# Supplementary material for: FRAP to Characterize Molecular Diffusion and Interaction in Various Membrane Environments
Source: PubMed Central journal article supplement (PMC4936743; doi:10.1371/journal.pone.0158457), 2016-07-07
Supplement: pone.0158457.s001.pdf [file pone.0158457.s001.pdf]

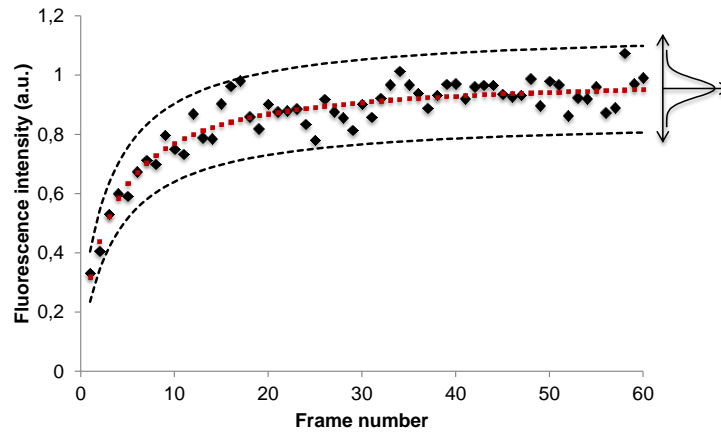

**S1 Figure.** Typical *in silico* simulated fluorescence recovery curve of a FRAP experiment (*i.e.* with the disk-shaped bleaching geometry). The simulated fluorescence intensity values (black diamonds) were generated by adding Gaussian noise  $G(i)$  to the theoretical values  $I(i)$  (red dots) deduced from Equation (1).  $G(i)$  is a random number with the Gaussian probability distribution centered on 0 with the standard deviation  $k \sqrt{I(i)}$  (zone delimited by the two dashed curves). In this example,  $\tau = 3$  frame periods and  $k = 0.05$ .
