# Supplementary material for: FRAP to Characterize Molecular Diffusion and Interaction in Various Membrane Environments
Source: PubMed Central journal article supplement (PMC4936743; doi:10.1371/journal.pone.0158457), 2016-07-07
Supplement: pone.0158457.s002.pdf [file pone.0158457.s002.pdf]

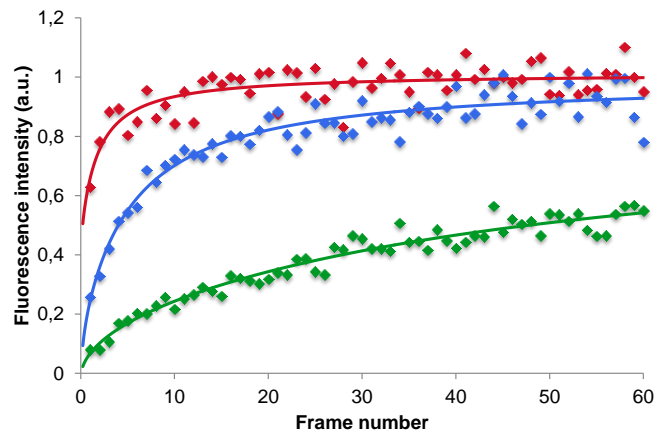

**S2 Figure.** Examples of 3 fitted *in silico* simulated fluorescence recovery curves for FRAP experiments (*i.e.* with the disk-shaped bleaching geometry) with 3 different characteristic diffusion times:  $\tau = 0.5$  (red), 5 (blue) or 50 (green) frame periods. The noise factor  $k$  used to generate the simulated fluorescence intensity values was 0.05 in all 3 cases. The fits were obtained using Equation (1).
