# Supplementary material for: FRAP to Characterize Molecular Diffusion and Interaction in Various Membrane Environments
Source: PubMed Central journal article supplement (PMC4936743; doi:10.1371/journal.pone.0158457), 2016-07-07
Supplement: pone.0158457.s006.pdf [file pone.0158457.s006.pdf]

**S1 Table.** Numerical values of the *in silico* studies of FRAP and FRAPP experiments with a single diffusing species (see the legend of S3 Fig for details). Each cell displays, for a given pair of  $(\tau, k)$  values, (i) the normalized difference between  $\langle \bar{\tau} \rangle$  and  $\tau$ ,  $(\langle \bar{\tau} \rangle - \tau) / \tau$  (left), and (ii) the normalized standard deviation,  $\sigma(\bar{\tau}) / \tau$  (right). The solvable cases (in green) were arbitrarily defined as the cases where  $\langle \bar{\tau} \rangle$  differs by less than 20% from  $\tau$  and  $\sigma(\bar{\tau}) / \tau$  is lower than 30%.

## FRAP

|                |      | $\tau \times \text{frame rate}$ |          |          |          |        |         |        |         |       |        |       |        |       |        |        |        |       |       |
|----------------|------|---------------------------------|----------|----------|----------|--------|---------|--------|---------|-------|--------|-------|--------|-------|--------|--------|--------|-------|-------|
|                |      | 0,2                             | 0,5      |          | 1        |        | 2       |        | 5       |       | 10     |       | 20     |       | 50     |        | 100    |       |       |
| Noise factor k | 0,02 | 0,50                            | 0,96     | 0,02     | 0,24     | 0,01   | 0,10    | 0,00   | 0,05    | 0,00  | 0,03   | 0,00  | 0,03   | 0,00  | 0,04   | 0,07   | 0,18   | 4,30  | 7,30  |
|                | 0,05 | 1190,00                         | 10590,00 | 0,21     | 0,66     | 0,05   | 0,25    | 0,02   | 0,13    | 0,01  | 0,09   | 0,02  | 0,09   | 0,04  | 0,16   | 9,00   | 21,00  | 23,00 | 25,00 |
|                | 0,1  |                                 |          | 453,00   | 3769,00  | 0,33   | 2,03    | 0,10   | 0,33    | 0,05  | 0,20   | 0,07  | 0,26   | 4,10  | 27,00  | 56,00  | 70,00  |       |       |
|                | 0,2  |                                 |          | 11219,00 | 30928,00 | 832,00 | 4135,00 | 172,00 | 1103,00 | 21,00 | 148,00 | 27,00 | 122,00 | 95,00 | 190,00 | 161,00 | 159,00 |       |       |

## FRAPP

|                |      | $\tau \times \text{frame rate}$ |        |       |        |      |       |      |       |      |       |       |      |      |      |      |       |       |      |
|----------------|------|---------------------------------|--------|-------|--------|------|-------|------|-------|------|-------|-------|------|------|------|------|-------|-------|------|
|                |      | 0,2                             | 0,5    |       | 1      |      | 2     |      | 5     |      | 10    |       | 20   |      | 50   |      | 100   |       |      |
| Noise factor k | 0,02 | 8,66                            | 109,04 | 0,02  | 0,34   | 0,01 | 0,07  | 0,00 | 0,03  | 0,00 | 0,02  | 0,00  | 0,01 | 0,00 | 0,01 | 0,00 | 0,03  | -1,00 | 0,00 |
|                | 0,05 | 5,46                            | 55,98  | 0,58  | 3,03   | 0,04 | 0,17  | 0,01 | 0,08  | 0,00 | 0,04  | 0,00  | 0,03 | 0,01 | 0,04 | 0,02 | 0,09  | -0,99 | 0,10 |
|                | 0,1  | 6,30                            | 35,53  | 1,95  | 13,27  | 0,19 | 0,62  | 0,02 | 0,18  | 0,01 | 0,08  | -0,04 | 0,13 | 0,01 | 0,08 | 0,12 | 0,28  | -0,81 | 2,22 |
|                | 0,2  | 8,46                            | 50,84  | 4,58  | 39,71  | 1,12 | 8,45  | 0,16 | 0,55  | 0,02 | 0,20  | -0,12 | 0,25 | 0,03 | 0,24 | 1,58 | 19,55 | -0,37 | 7,48 |
|                | 0,5  | 11,40                           | 59,78  | 14,52 | 241,81 | 3,46 | 36,84 | 1,51 | 14,01 | 0,83 | 12,37 | 0,07  | 1,29 | 0,41 | 3,01 | 2,29 | 31,81 | -0,60 | 2,00 |
