# Supplementary material for: FRAP to Characterize Molecular Diffusion and Interaction in Various Membrane Environments
Source: PubMed Central journal article supplement (PMC4936743; doi:10.1371/journal.pone.0158457), 2016-07-07
Supplement: pone.0158457.s007.pdf [file pone.0158457.s007.pdf]

**S2 Table.** Numerical values of the *in silico* studies of FRAP experiments with two diffusing species (see the legend of S4 Fig for details). Each cell displays, for a given pair of  $(\tau_1, \tau_2)$  values, (i) the normalized differences between the averages and the theoretical values (left):  $(\langle \bar{\tau}_1 \rangle - \tau_1) / \tau_1$  (first line),  $(\langle \bar{\tau}_2 \rangle - \tau_2) / \tau_2$  (second line),  $|\langle \bar{R} \rangle - R| / R + |(1 - \langle \bar{R} \rangle) - (1 - R)| / (1 - R)$  (third line), and (ii) the associated normalized standard deviations (right):  $\sigma(\bar{\tau}_1) / \tau_1$  (first line),  $\sigma(\bar{\tau}_2) / \tau_2$  (second line) and  $\sigma(\bar{R}) / R$  (third line). The solvable cases (in green) were arbitrarily defined as the cases where  $\langle \bar{\tau}_1 \rangle$ ,  $\langle \bar{\tau}_2 \rangle$  and  $\langle \bar{R} \rangle$  all differ by less than 20% from the theoretical values, and all normalized standard deviations are lower than 20%.

R=0.1

$\tau_1 \times \text{frame rate}$

|                                   |                          | $\tau_1 \times \text{frame rate}$ |                         |                         |                          |                         |                       |                        |                       |                       |
|-----------------------------------|--------------------------|-----------------------------------|-------------------------|-------------------------|--------------------------|-------------------------|-----------------------|------------------------|-----------------------|-----------------------|
| $k = 0,001$                       |                          | 0,2                               | 0,5                     | 1                       | 2                        | 5                       | 10                    | 20                     | 50                    |                       |
| $\tau_2 \times \text{frame rate}$ | 0,5                      | 1,12<br>3156,03<br>10,55          | 0,56<br>5991,37<br>3,05 |                         |                          |                         |                       |                        |                       |                       |
|                                   | 1                        | 2,90<br>5,43<br>8,64              | 0,97<br>20,06<br>3,36   | 0,63<br>5,35<br>9,27    | 0,34<br>20,38<br>2,95    |                         |                       |                        |                       |                       |
|                                   | 2                        | 2,61<br>2,24<br>3,35              | 2,27<br>13,13<br>1,92   | 0,56<br>0,94<br>4,07    | 0,84<br>3,05<br>1,86     | -0,05<br>0,72<br>3,93   | 0,49<br>1,37<br>2,32  |                        |                       |                       |
|                                   | 5                        | 1,99<br>0,03<br>1,06              | 2,47<br>0,07<br>0,76    | 0,15<br>0,01<br>0,76    | 0,52<br>0,01<br>0,62     | 0,01<br>0,01<br>0,57    | 0,41<br>0,04<br>0,60  | 0,09<br>0,15<br>2,11   | 0,43<br>0,21<br>1,88  |                       |
|                                   | 10                       | 0,60<br>0,00<br>0,63              | 0,96<br>0,01<br>0,42    | 0,05<br>0,00<br>0,28    | 0,31<br>0,01<br>0,36     | 0,05<br>0,00<br>0,06    | 0,18<br>0,01<br>0,06  | 0,00<br>0,00<br>0,11   | 0,15<br>0,01<br>0,09  | -0,02<br>0,13<br>2,11 |
|                                   | 20                       | 0,27<br>0,00<br>0,49              | 0,60<br>0,01<br>0,36    | -0,02<br>0,00<br>0,11   | 0,19<br>0,01<br>0,12     | 0,02<br>0,00<br>0,01    | 0,08<br>0,01<br>0,01  | 0,01<br>0,00<br>0,04   | 0,07<br>0,01<br>0,02  | 0,02<br>0,14<br>2,11  |
|                                   | 50                       | 0,22<br>0,00<br>0,26              | 0,42<br>0,01<br>0,20    | 0,01<br>0,00<br>0,07    | 0,14<br>0,01<br>0,06     | 0,00<br>0,00<br>0,01    | 0,07<br>0,02<br>0,01  | 0,00<br>0,00<br>0,05   | 0,05<br>0,04<br>0,03  | 0,01<br>0,13<br>0,16  |
|                                   | 100                      | 213,08<br>-0,26<br>1,20           | 41,02<br>0,03<br>2,03   | -0,74<br>-0,24<br>1,75  | 0,10<br>0,02<br>0,41     | 0,00<br>0,01<br>0,02    | 0,05<br>0,05<br>0,01  | 0,00<br>0,02<br>0,01   | 0,04<br>0,07<br>0,01  | 0,00<br>0,09<br>0,02  |
|                                   | 0,5                      | 1,07<br>3045,59<br>9,23           | 0,87<br>8451,79<br>3,90 |                         |                          |                         |                       |                        |                       |                       |
|                                   | 1                        | 3,30<br>3368,85<br>9,64           | 0,96<br>4767,18<br>2,13 | 0,64<br>3621,61<br>9,81 | 0,60<br>4372,65<br>2,05  |                         |                       |                        |                       |                       |
| 2                                 | 5,36<br>1218,98<br>6,99  | 2,66<br>1611,70<br>2,71           | 1,73<br>942,90<br>6,62  | 0,77<br>1758,29<br>2,44 | 0,57<br>1575,36<br>8,10  | 0,36<br>1898,37<br>2,28 |                       |                        |                       |                       |
| 5                                 | 5,83<br>49,77<br>2,27    | 4,92<br>122,88<br>1,76            | 0,74<br>13,46<br>1,58   | 1,08<br>54,83<br>1,05   | 0,32<br>6,87<br>1,81     | 0,76<br>29,30<br>1,41   | 0,14<br>66,95<br>3,41 | 0,49<br>152,80<br>2,35 |                       |                       |
| 10                                | 4,97<br>1,31<br>1,26     | 6,67<br>8,29<br>1,18              | 0,20<br>0,00<br>0,67    | 0,58<br>0,01<br>0,68    | 0,06<br>0,01<br>0,29     | 0,40<br>0,02<br>0,34    | 0,30<br>0,02<br>0,47  | 0,18<br>35,72<br>3,70  | 0,36<br>58,38<br>2,40 |                       |
| 20                                | 1,99<br>0,01<br>0,91     | 5,57<br>0,01<br>0,61              | 0,01<br>0,00<br>0,52    | 0,37<br>0,01<br>0,56    | 0,02<br>0,00<br>0,21     | 0,20<br>0,01<br>0,86    | 0,03<br>0,00<br>0,06  | 0,15<br>0,02<br>0,06   | 0,47<br>0,53<br>1,03  |                       |
| 50                                | 0,56<br>0,01<br>0,77     | 0,87<br>0,02<br>0,52              | -0,02<br>0,01<br>0,56   | 0,31<br>0,03<br>1,01    | 0,00<br>0,00<br>0,31     | 0,15<br>0,03<br>1,24    | -0,01<br>0,01<br>0,72 | 0,14<br>0,04<br>1,92   | 0,00<br>0,08<br>0,68  |                       |
| 100                               | 2,06<br>0,07<br>0,81     | 15,38<br>0,10<br>1,25             | 0,01<br>0,04<br>0,72    | 0,26<br>0,10<br>1,43    | -0,18<br>-0,03<br>3,05   | 0,26<br>0,13<br>3,47    | -0,05<br>0,07<br>1,12 | 0,16<br>0,28<br>2,71   | 0,01<br>0,41<br>0,07  |                       |
| 0,5                               | 1,55<br>1936,44<br>15,69 | 0,89<br>3367,52<br>6,21           |                         |                         |                          |                         |                       |                        |                       |                       |
| 1                                 | 2,61<br>241,62<br>11,31  | 1,34<br>479,63<br>5,99            | 0,63<br>234,20<br>11,56 | 0,60<br>480,70<br>5,67  |                          |                         |                       |                        |                       |                       |
| 2                                 | 3,56<br>103,80<br>6,05   | 2,12<br>253,76<br>5,01            | 0,75<br>108,47<br>6,24  | 0,93<br>228,33<br>4,60  | -0,03<br>115,11<br>6,27  | 0,45<br>232,56<br>4,83  |                       |                        |                       |                       |
| 5                                 | 7,88<br>11,60<br>3,77    | 5,17<br>24,63<br>2,64             | 2,20<br>12,05<br>4,12   | 2,12<br>27,62<br>1,72   | 0,95<br>7,47<br>4,38     | 0,93<br>22,57<br>1,83   | 0,13<br>11,48<br>4,36 | 0,54<br>27,63<br>3,26  |                       |                       |
| 10                                | 11,31<br>1,59<br>2,67    | 8,27<br>4,55<br>2,36              | 2,21<br>1,02<br>2,24    | 2,58<br>2,95<br>1,26    | 0,71<br>0,85<br>1,68     | 1,22<br>3,45<br>1,25    | 0,42<br>3,11<br>2,02  | 0,70<br>7,89<br>1,55   | 0,06<br>2,46<br>4,40  |                       |
| 20                                | 12,95<br>0,35<br>1,91    | 14,17<br>0,80<br>2,90             | 0,86<br>0,07<br>1,12    | 1,86<br>0,26<br>0,84    | 0,27<br>0,03<br>0,55     | 0,73<br>0,08<br>0,55    | 0,20<br>0,10<br>0,44  | 0,56<br>0,28<br>0,50   | 0,31<br>0,86<br>1,88  |                       |
| 50                                | 20,01<br>0,20<br>2,60    | 25,97<br>0,46<br>4,37             | 0,34<br>0,07<br>0,70    | 0,79<br>0,20<br>0,56    | 0,10<br>0,06<br>0,22     | 0,36<br>0,15<br>0,31    | 0,07<br>0,15<br>0,06  | 0,26<br>0,49<br>0,05   | 0,06<br>0,31<br>0,20  |                       |
| 100                               | 181,52<br>-0,24<br>18,33 | 73,58<br>0,18<br>12,60            | 0,30<br>-0,08<br>1,26   | 3,60<br>0,27<br>0,68    | -0,02<br>0,46<br>0,38    | 0,33<br>0,83<br>0,50    | -0,01<br>0,72<br>0,10 | 0,20<br>1,21<br>0,09   | 0,16<br>0,10<br>0,16  |                       |
| 0,5                               | 1,83<br>1565,12<br>19,49 | 1,46<br>2770,40<br>10,19          |                         |                         |                          |                         |                       |                        |                       |                       |
| 1                                 | 2,46<br>508,06<br>13,96  | 1,63<br>825,94<br>9,28            | 0,45<br>421,22<br>14,85 | 0,61<br>791,48<br>9,27  |                          |                         |                       |                        |                       |                       |
| 2                                 | 3,61<br>206,02<br>16,47  | 1,90<br>359,33<br>12,57           | 0,56<br>146,51<br>12,75 | 0,70<br>270,39<br>10,96 | -0,12<br>150,25<br>13,08 | 0,43<br>267,97<br>11,35 |                       |                        |                       |                       |
| 5                                 | 8,98<br>31,83<br>6,81    | 5,78<br>56,84<br>5,72             | 2,84<br>30,69<br>7,61   | 1,99<br>54,59<br>6,64   | 1,10<br>35,77<br>5,81    | 0,97<br>57,85<br>4,11   | 0,16<br>33,03<br>6,91 | 0,51<br>62,44<br>6,47  |                       |                       |
| 10                                | 18,02<br>5,30<br>6,70    | 9,37<br>10,67<br>5,91             | 4,57<br>6,33<br>4,46    | 3,34<br>13,59<br>3,43   | 1,80<br>7,55<br>3,37     | 1,60<br>13,53<br>1,98   | 0,66<br>9,34<br>4,10  | 0,90<br>17,32<br>3,55  | -0,02<br>6,96<br>7,73 |                       |
| 20                                | 30,79<br>2,68<br>5,87    | 15,82<br>4,80<br>5,29             | 5,81<br>2,90<br>2,43    | 5,41<br>5,79<br>2,58    | 1,46<br>1,52<br>1,98     | 2,07<br>3,67<br>1,86    | 0,71<br>1,91<br>1,47  | 1,02<br>4,60<br>1,71   | 0,46<br>3,24<br>3,76  |                       |
| 50                                | 55,09<br>1,64<br>9,68    | 36,55<br>2,70<br>11,45            | 4,65<br>1,01<br>3,06    | 6,85<br>2,49<br>5,01    | 0,58<br>1,69<br>1,01     | 1,49<br>4,65<br>2,19    | 0,37<br>2,11<br>0,31  | 0,54<br>4,41<br>0,41   | 0,14<br>2,97<br>0,59  |                       |
| 100                               | 180,60<br>-0,14<br>34,06 | 74,55<br>0,56<br>18,39            | 12,89<br>0,43<br>5,41   | 20,43<br>1,17<br>9,03   | -0,01<br>1,29<br>1,17    | 0,92<br>2,09<br>1,61    | 0,01<br>3,23<br>0,35  | 0,37<br>3,43<br>0,40   | 0,04<br>2,88<br>0,51  |                       |
| 0,5                               | 1,83<br>1565,12<br>19,49 | 1,46<br>2770,40<br>10,19          |                         |                         |                          |                         |                       |                        |                       |                       |
| 1                                 | 2,46<br>508,06<br>13,96  | 1,63<br>825,94<br>9,28            | 0,45<br>421,22<br>14,85 | 0,61<br>791,48<br>9,27  |                          |                         |                       |                        |                       |                       |
| 2                                 | 3,61<br>206,02<br>16,47  | 1,90<br>359,33<br>12,57           | 0,56<br>146,51<br>12,75 | 0,70<br>270,39<br>10,96 | -0,12<br>150,25<br>13,08 | 0,43<br>267,97<br>11,35 |                       |                        |                       |                       |
| 5                                 | 8,98<br>31,83<br>6,81    | 5,78<br>56,84<br>5,72             | 2,84<br>30,69<br>7,61   | 1,99<br>54,59<br>6,64   | 1,10<br>35,77<br>5,81    | 0,97<br>57,85<br>4,11   | 0,16<br>33,03<br>6,91 | 0,51<br>62,44<br>6,47  |                       |                       |
| 10                                | 18,02<br>5,30<br>6,70    | 9,37<br>10,67<br>5,91             | 4,57<br>6,33<br>4,46    | 3,34<br>13,59<br>3,43   | 1,80<br>7,55<br>3,37     | 1,60<br>13,53<br>1,98   | 0,66<br>9,34<br>4,10  | 0,90<br>17,32<br>3,55  | -0,02<br>6,96<br>7,73 |                       |
| 20                                | 30,79<br>2,68<br>5,87    | 15,82<br>4,80<br>5,29             | 5,81<br>2,90<br>2,43    | 5,41<br>5,79<br>2,58    | 1,46<br>1,52<br>1,98     | 2,07<br>3,67<br>1,86    | 0,71<br>1,91<br>1,47  | 1,02<br>4,60<br>1,71   | 0,46<br>3,24<br>3,76  |                       |
| 50                                | 55,09<br>1,64<br>9,68    | 36,55<br>2,70<br>11,45            | 4,65<br>1,01<br>3,06    | 6,85<br>2,49<br>5,01    | 0,58<br>1,69<br>1,01     | 1,49<br>4,65<br>2,19    | 0,37<br>2,11<br>0,31  | 0,54<br>4,41<br>0,41   | 0,14<br>2,97<br>0,59  |                       |
| 100                               | 180,60<br>-0,14<br>34,06 | 74,55<br>0,56<br>18,39            | 12,89<br>0,43<br>5,41   | 20,43<br>1,17<br>9,03   | -0,01<br>1,29<br>1,17    | 0,92<br>2,09<br>1,61    | 0,01<br>3,23<br>0,35  | 0,37<br>3,43<br>0,40   | 0,04<br>2,88<br>0,51  |                       |

R=0.2

$\tau_1 \times \text{frame rate}$

| $k=0,001$ | 0,2                    |                         | 0,5                     |                       | 1                     |                      | 2                     |                      | 5                    |                       | 10                    |                      | 20                     |                      | 50                     |                      |
|-----------|------------------------|-------------------------|-------------------------|-----------------------|-----------------------|----------------------|-----------------------|----------------------|----------------------|-----------------------|-----------------------|----------------------|------------------------|----------------------|------------------------|----------------------|
|           | 0,5                    | 1,11<br>1976,00<br>5,38 | 0,50<br>3657,80<br>1,46 |                       |                       |                      |                       |                      |                      |                       |                       |                      |                        |                      |                        |                      |
| 1         | 2,14<br>8,43<br>3,65   | 1,07<br>21,89<br>1,54   | 0,37<br>14,25<br>3,75   | 0,38<br>48,55<br>1,73 |                       |                      |                       |                      |                      |                       |                       |                      |                        |                      |                        |                      |
| 2         | 2,39<br>0,84<br>1,76   | 1,85<br>2,52<br>0,90    | 0,42<br>0,69<br>1,83    | 0,67<br>2,25<br>0,93  | -0,06<br>0,81<br>2,02 | 0,48<br>1,17<br>1,36 |                       |                      |                      |                       |                       |                      |                        |                      |                        |                      |
| 5         | 0,69<br>0,01<br>0,43   | 0,92<br>0,01<br>0,33    | 0,06<br>0,01<br>0,24    | 0,32<br>0,02<br>0,26  | 0,00<br>0,00<br>0,10  | 0,19<br>0,02<br>0,10 | -0,03<br>0,06<br>0,57 | 0,23<br>0,14<br>0,47 |                      |                       |                       |                      |                        |                      |                        |                      |
| 10        | 0,21<br>0,00<br>0,39   | 0,49<br>0,01<br>0,28    | 0,02<br>0,00<br>0,06    | 0,15<br>0,01<br>0,09  | -0,01<br>0,00<br>0,02 | 0,09<br>0,01<br>0,01 | 0,01<br>0,00<br>0,06  | 0,06<br>0,02<br>0,05 | 0,01<br>0,12<br>0,88 | 0,19<br>0,19<br>0,75  |                       |                      |                        |                      |                        |                      |
| 20        | 0,16<br>0,00<br>0,26   | 0,39<br>0,01<br>0,21    | 0,02<br>0,00<br>0,04    | 0,11<br>0,01<br>0,04  | 0,00<br>0,00<br>0,01  | 0,05<br>0,01<br>0,01 | 0,00<br>0,00<br>0,02  | 0,04<br>0,01<br>0,11 | 0,01<br>0,01<br>0,11 | 0,07<br>0,03<br>0,08  | 0,00<br>0,16<br>0,93  | 0,20<br>0,19<br>0,72 |                        |                      |                        |                      |
| 50        | 0,02<br>0,00<br>0,24   | 0,27<br>0,01<br>0,17    | 0,00<br>0,00<br>0,03    | 0,08<br>0,01<br>0,03  | 0,00<br>0,00<br>0,01  | 0,04<br>0,02<br>0,01 | 0,00<br>0,00<br>0,00  | 0,02<br>0,02<br>0,00 | 0,00<br>0,00<br>0,02 | 0,03<br>0,03<br>0,02  | -0,01<br>0,01<br>0,09 | 0,06<br>0,08<br>0,07 | -0,07<br>0,12<br>0,46  | 0,18<br>0,19<br>0,30 |                        |                      |
| 100       | -0,68<br>-0,29<br>1,30 | 0,02<br>0,01<br>0,09    | -0,69<br>-0,34<br>1,26  | 0,07<br>0,02<br>0,22  | 0,00<br>0,02<br>0,02  | 0,03<br>0,08<br>0,02 | 0,00<br>0,02<br>0,02  | 0,02<br>0,08<br>0,02 | 0,00<br>0,11<br>0,03 | 0,03<br>0,20<br>-0,03 | -0,01<br>0,19<br>0,05 | 0,04<br>0,30<br>0,03 | -0,09<br>-0,11<br>0,22 | 0,09<br>0,11<br>0,16 | 0,13<br>-0,38<br>13,12 | 0,13<br>0,07<br>5,30 |

| $k=0,002$ | 0,2                     |                         | 0,5                      |                         | 1                       |                         | 2                    |                       | 5                      |                       | 10                    |                      | 20                    |                      | 50                    |                      |
|-----------|-------------------------|-------------------------|--------------------------|-------------------------|-------------------------|-------------------------|----------------------|-----------------------|------------------------|-----------------------|-----------------------|----------------------|-----------------------|----------------------|-----------------------|----------------------|
|           | 0,5                     | 1,05<br>8656,34<br>5,31 | 1,02<br>10462,24<br>1,66 |                         |                         |                         |                      |                       |                        |                       |                       |                      |                       |                      |                       |                      |
| 1         | 2,62<br>2651,47<br>4,74 | 1,28<br>4827,24<br>1,40 | 0,50<br>2378,47<br>4,56  | 0,52<br>3269,63<br>1,39 |                         |                         |                      |                       |                        |                       |                       |                      |                       |                      |                       |                      |
| 2         | 3,83<br>690,76<br>2,44  | 2,12<br>1218,09<br>1,13 | 0,77<br>449,85<br>2,48   | 0,84<br>959,59<br>1,17  | 0,44<br>1207,88<br>3,60 | 0,32<br>1686,00<br>1,15 |                      |                       |                        |                       |                       |                      |                       |                      |                       |                      |
| 5         | 2,18<br>4,32<br>0,70    | 2,47<br>24,77<br>0,45   | 0,24<br>0,03<br>0,69     | 0,67<br>0,07<br>0,40    | 0,03<br>0,03<br>0,51    | 0,39<br>0,08<br>0,45    | 0,06<br>7,73<br>1,29 | 0,36<br>42,23<br>0,98 |                        |                       |                       |                      |                       |                      |                       |                      |
| 10        | 0,70<br>0,01<br>0,58    | 1,00<br>0,01<br>0,39    | 0,02<br>0,00<br>0,45     | 0,32<br>0,02<br>0,87    | 0,02<br>0,00<br>0,05    | 0,17<br>0,02<br>0,06    | 0,04<br>0,02<br>0,16 | 0,17<br>0,04<br>0,15  | -0,08<br>15,78<br>1,43 | 0,32<br>36,99<br>0,92 |                       |                      |                       |                      |                       |                      |
| 20        | 0,38<br>0,01<br>0,56    | 0,76<br>0,01<br>0,38    | 0,00<br>0,00<br>0,12     | 0,19<br>0,01<br>0,13    | 0,01<br>0,00<br>0,02    | 0,12<br>0,01<br>0,01    | 0,00<br>0,00<br>0,04 | 0,08<br>0,02<br>0,03  | 0,03<br>0,04<br>0,24   | 0,16<br>8,74<br>0,22  | -0,03<br>4,02<br>1,12 | 0,30<br>0,14<br>0,85 |                       |                      |                       |                      |
| 50        | 0,24<br>0,01<br>0,43    | 0,50<br>0,03<br>0,34    | 0,00<br>0,00<br>0,21     | 0,19<br>0,04<br>0,01    | 0,01<br>0,01<br>0,02    | 0,08<br>0,04<br>0,01    | 0,01<br>0,02<br>0,01 | 0,06<br>0,05<br>0,01  | 0,01<br>0,04<br>0,08   | 0,08<br>0,09<br>0,37  | -0,01<br>0,26<br>0,17 | 0,13<br>0,51<br>0,14 | -0,10<br>0,71<br>0,63 | 0,26<br>1,07<br>0,52 |                       |                      |
| 100       | -0,07<br>0,08<br>0,97   | 0,53<br>0,40<br>1,02    | 0,02<br>0,12<br>0,15     | 0,18<br>0,27<br>0,34    | -0,02<br>0,08<br>0,38   | 0,10<br>0,23<br>1,45    | 0,00<br>0,27<br>0,05 | 0,05<br>0,82<br>0,07  | 0,00<br>1,05<br>0,10   | 0,05<br>1,86<br>0,12  | -0,02<br>1,30<br>0,18 | 0,07<br>1,76<br>0,10 | -0,14<br>0,22<br>0,34 | 0,17<br>0,39<br>0,25 | -0,40<br>0,09<br>2,71 | 0,16<br>0,43<br>1,79 |

| $k=0,005$ | 0,2                    |                         | 0,5                     |                        | 1                      |                        | 2                     |                       | 5                     |                      | 10                    |                      | 20                    |                      | 50                    |                      |
|-----------|------------------------|-------------------------|-------------------------|------------------------|------------------------|------------------------|-----------------------|-----------------------|-----------------------|----------------------|-----------------------|----------------------|-----------------------|----------------------|-----------------------|----------------------|
|           | 0,5                    | 1,23<br>1169,55<br>7,40 | 0,90<br>1979,87<br>3,16 |                        |                        |                        |                       |                       |                       |                      |                       |                      |                       |                      |                       |                      |
| 1         | 2,66<br>337,48<br>6,02 | 1,38<br>557,73<br>2,98  | 0,58<br>343,86<br>6,79  | 0,54<br>610,32<br>3,12 |                        |                        |                       |                       |                       |                      |                       |                      |                       |                      |                       |                      |
| 2         | 3,14<br>100,15<br>3,48 | 2,07<br>224,01<br>2,45  | 0,70<br>124,84<br>2,90  | 0,82<br>234,64<br>1,48 | -0,10<br>99,45<br>3,58 | 0,43<br>210,21<br>2,85 |                       |                       |                       |                      |                       |                      |                       |                      |                       |                      |
| 5         | 4,59<br>11,43<br>1,64  | 4,25<br>31,15<br>0,81   | 0,97<br>1,51<br>1,69    | 1,26<br>7,19<br>0,68   | 0,36<br>5,99<br>1,69   | 0,79<br>21,54<br>0,82  | 0,03<br>11,22<br>2,11 | 0,54<br>27,06<br>1,23 |                       |                      |                       |                      |                       |                      |                       |                      |
| 10        | 3,17<br>0,42<br>0,99   | 4,69<br>2,10<br>0,87    | 0,36<br>0,02<br>0,76    | 0,86<br>0,05<br>0,55   | 0,10<br>0,08<br>0,48   | 0,54<br>0,48<br>0,41   | 0,13<br>0,57<br>0,50  | 0,38<br>2,85<br>0,46  | -0,09<br>3,91<br>1,82 | 0,32<br>8,09<br>1,43 |                       |                      |                       |                      |                       |                      |
| 20        | 2,34<br>0,17<br>0,56   | 4,49<br>0,91<br>0,36    | 0,02<br>0,01<br>0,54    | 0,45<br>0,03<br>0,48   | 0,02<br>0,01<br>0,10   | 0,27<br>0,04<br>0,15   | 0,05<br>0,03<br>0,11  | 0,24<br>0,07<br>0,10  | 0,03<br>0,80<br>0,48  | 0,29<br>1,88<br>0,35 | -0,07<br>1,20<br>1,70 | 0,31<br>1,93<br>1,36 |                       |                      |                       |                      |
| 50        | 1,10<br>0,11<br>0,49   | 1,70<br>0,49<br>0,36    | 0,16<br>0,08<br>0,32    | 0,39<br>0,12<br>0,29   | 0,01<br>0,04<br>0,05   | 0,19<br>0,13<br>0,07   | -0,01<br>0,06<br>0,02 | 0,13<br>0,17<br>0,02  | 0,03<br>1,37<br>0,11  | 0,16<br>3,00<br>0,09 | -0,07<br>1,28<br>0,27 | 0,22<br>1,60<br>0,18 | -0,07<br>2,56<br>1,27 | 0,31<br>3,43<br>1,47 |                       |                      |
| 100       | 0,15<br>-0,14<br>0,86  | 1,35<br>0,30<br>0,43    | -0,33<br>0,12<br>1,17   | 0,38<br>0,79<br>0,61   | 0,02<br>1,19<br>0,15   | 0,05<br>1,83<br>0,13   | 0,00<br>2,77<br>0,19  | 0,10<br>3,37<br>0,17  | -0,04<br>2,95<br>0,23 | 0,10<br>3,21<br>0,18 | -0,11<br>1,01<br>0,29 | 0,14<br>1,22<br>0,15 | 0,14<br>0,95<br>1,37  | 0,33<br>1,68<br>1,84 | -0,43<br>0,63<br>3,66 | 0,17<br>0,93<br>2,20 |

| $k=0,01$ | 0,2                    |                         | 0,5                     |                        | 1                       |                        | 2                     |                       | 5                     |                       | 10                    |                      | 20                    |                      | 50                      |                      |
|----------|------------------------|-------------------------|-------------------------|------------------------|-------------------------|------------------------|-----------------------|-----------------------|-----------------------|-----------------------|-----------------------|----------------------|-----------------------|----------------------|-------------------------|----------------------|
|          | 0,5                    | 1,65<br>1769,15<br>9,85 | 1,22<br>2722,34<br>4,95 |                        |                         |                        |                       |                       |                       |                       |                       |                      |                       |                      |                         |                      |
| 1        | 2,75<br>372,76<br>7,53 | 1,70<br>692,86<br>4,74  | 0,61<br>424,19<br>8,42  | 0,59<br>716,87<br>5,19 |                         |                        |                       |                       |                       |                       |                       |                      |                       |                      |                         |                      |
| 2        | 2,68<br>159,93<br>8,22 | 1,90<br>274,72<br>7,34  | 0,52<br>193,11<br>7,25  | 0,78<br>351,98<br>7,10 | -0,21<br>162,16<br>7,85 | 0,35<br>271,06<br>6,47 |                       |                       |                       |                       |                       |                      |                       |                      |                         |                      |
| 5        | 7,66<br>27,45<br>3,96  | 4,90<br>51,03<br>3,89   | 1,78<br>15,40<br>2,82   | 1,63<br>39,94<br>1,67  | 0,54<br>27,17<br>2,60   | 0,78<br>47,30<br>1,91  | 0,01<br>29,62<br>3,43 | 0,44<br>54,27<br>3,12 |                       |                       |                       |                      |                       |                      |                         |                      |
| 10       | 11,84<br>7,59<br>2,25  | 7,13<br>15,67<br>2,28   | 1,51<br>1,93<br>1,41    | 1,92<br>7,04<br>1,44   | 0,57<br>2,59<br>1,17    | 1,03<br>8,22<br>0,64   | 0,19<br>6,93<br>1,31  | 0,56<br>14,22<br>1,24 | -0,11<br>8,64<br>3,27 | 0,37<br>13,60<br>3,65 |                       |                      |                       |                      |                         |                      |
| 20       | 12,62<br>2,26<br>1,36  | 12,00<br>5,05<br>1,83   | 1,16<br>0,41<br>0,76    | 1,59<br>1,78<br>0,54   | 0,25<br>1,97<br>0,50    | 0,70<br>1,87<br>0,43   | 0,17<br>0,81<br>0,32  | 0,48<br>3,15<br>0,30  | 0,20<br>5,20<br>1,05  | 0,42<br>7,20<br>1,29  | -0,10<br>2,54<br>3,52 | 0,30<br>3,73<br>3,80 |                       |                      |                         |                      |
| 50       | 9,59<br>1,61<br>1,14   | 16,93<br>2,98<br>2,19   | 0,46<br>1,33<br>0,68    | 0,85<br>3,86<br>0,55   | 0,12<br>2,02<br>0,24    | 0,39<br>4,38<br>0,30   | 0,05<br>3,76<br>0,12  | 0,24<br>6,30<br>0,13  | -0,05<br>5,27<br>0,25 | 0,25<br>7,55<br>0,14  | -0,12<br>3,37<br>0,57 | 0,31<br>4,04<br>0,95 | -0,28<br>1,13<br>4,29 | 0,26<br>1,52<br>4,71 |                         |                      |
| 100      | 46,54<br>0,88<br>4,42  | 51,99<br>1,95<br>5,96   | -0,11<br>1,27<br>1,30   | 0,61<br>2,38<br>0,76   | -0,07<br>3,96<br>0,42   | 0,30<br>4,14<br>0,34   | -0,02<br>7,15<br>0,31 | 0,19<br>6,81<br>0,23  | -0,05<br>7,90<br>0,39 | 0,18<br>7,09<br>0,21  | -0,16<br>2,90<br>0,47 | 0,23<br>2,86<br>0,58 | -0,19<br>0,29<br>5,91 | 0,26<br>0,74<br>5,82 | -0,14<br>-0,43<br>22,04 | 0,22<br>0,15<br>9,01 |

R=0.3

$\tau_1 \times \text{frame rate}$

| $k=0,001$ | 0,2                     | 0,5                     | 1                      | 2                     | 5                     | 10                   | 20                   | 50                   |                       |                      |                       |                      |                        |                      |                      |      |
|-----------|-------------------------|-------------------------|------------------------|-----------------------|-----------------------|----------------------|----------------------|----------------------|-----------------------|----------------------|-----------------------|----------------------|------------------------|----------------------|----------------------|------|
| 0,5       | 0,95<br>1525,47<br>3,52 | 0,47<br>3554,16<br>0,97 |                        |                       |                       |                      |                      |                      |                       |                      |                       |                      |                        |                      |                      |      |
| 1         | 1,49<br>33,46<br>2,05   | 1,07<br>131,79<br>0,96  | 0,17<br>13,74<br>2,25  | 0,42<br>32,03<br>1,17 |                       |                      |                      |                      |                       |                      |                       |                      |                        |                      |                      |      |
| 2         | 1,72<br>0,35<br>0,94    | 1,55<br>0,93<br>0,51    | 0,25<br>0,31<br>1,14   | 0,61<br>0,67<br>0,50  | -0,12<br>3,17<br>1,34 | 0,36<br>8,62<br>0,75 |                      |                      |                       |                      |                       |                      |                        |                      |                      |      |
| 5         | 0,29<br>0,01<br>0,35    | 0,65<br>0,01<br>0,26    | 0,02<br>0,00<br>0,14   | 0,27<br>0,02<br>0,17  | 0,02<br>0,01<br>0,08  | 0,13<br>0,02<br>0,07 | 0,01<br>0,05<br>0,37 | 0,15<br>0,09<br>0,27 |                       |                      |                       |                      |                        |                      |                      |      |
| 10        | 0,08<br>0,00<br>0,26    | 0,38<br>0,01<br>0,22    | 0,00<br>0,00<br>0,04   | 0,11<br>0,01<br>0,04  | 0,01<br>0,00<br>0,02  | 0,06<br>0,01<br>0,01 | 0,01<br>0,02<br>0,05 | 0,05<br>0,12<br>0,48 | 0,00<br>0,15<br>0,57  |                      |                       |                      |                        |                      |                      |      |
| 20        | 0,07<br>0,00<br>0,21    | 0,30<br>0,01<br>0,18    | 0,00<br>0,00<br>0,03   | 0,07<br>0,01<br>0,02  | 0,00<br>0,00<br>0,01  | 0,04<br>0,01<br>0,00 | 0,03<br>0,01<br>0,01 | 0,03<br>0,04<br>0,09 | -0,01<br>0,00<br>0,53 | 0,06<br>0,15<br>0,43 |                       |                      |                        |                      |                      |      |
| 50        | -0,08<br>0,00<br>0,21   | 0,21<br>0,02<br>0,17    | 0,01<br>0,00<br>0,02   | 0,05<br>0,02<br>0,02  | 0,00<br>0,00<br>0,01  | 0,02<br>0,02<br>0,01 | 0,00<br>0,01<br>0,00 | 0,02<br>0,03<br>0,01 | 0,00<br>0,04<br>0,07  | 0,05<br>0,10<br>0,05 | -0,08<br>0,11<br>0,34 | 0,13<br>0,18<br>0,26 |                        |                      |                      |      |
| 100       | -0,81<br>-0,25<br>1,77  | 0,02<br>0,03<br>0,08    | -0,27<br>-0,26<br>0,34 | 0,11<br>0,08<br>0,14  | 0,00<br>0,02<br>0,02  | 0,00<br>0,02<br>0,02 | 0,00<br>0,03<br>0,03 | 0,02<br>0,10<br>0,02 | 0,00<br>0,24<br>0,06  | 0,02<br>0,44<br>0,06 | 0,00<br>0,25<br>0,07  | 0,03<br>0,32<br>0,05 | -0,07<br>-0,12<br>0,20 | 0,07<br>0,15<br>0,15 | 0,10<br>0,08<br>7,70 | 3,18 |

| $k=0,002$ | 0,2                      | 0,5                      | 1                       | 2                       | 5                       | 10                      | 20                   | 50                    |                       |                       |                       |                      |                       |                      |                       |                      |
|-----------|--------------------------|--------------------------|-------------------------|-------------------------|-------------------------|-------------------------|----------------------|-----------------------|-----------------------|-----------------------|-----------------------|----------------------|-----------------------|----------------------|-----------------------|----------------------|
| 0,5       | 1,15<br>10715,46<br>3,89 | 0,57<br>14528,02<br>1,06 |                         |                         |                         |                         |                      |                       |                       |                       |                       |                      |                       |                      |                       |                      |
| 1         | 2,19<br>2494,51<br>2,88  | 1,43<br>4120,77<br>1,10  | 0,45<br>2209,88<br>3,05 | 0,41<br>3874,57<br>0,80 |                         |                         |                      |                       |                       |                       |                       |                      |                       |                      |                       |                      |
| 2         | 2,77<br>324,79<br>1,48   | 1,99<br>656,10<br>0,74   | 0,62<br>249,79<br>1,57  | 0,73<br>669,17<br>0,69  | 0,10<br>1004,26<br>1,68 | 0,34<br>1617,42<br>0,77 |                      |                       |                       |                       |                       |                      |                       |                      |                       |                      |
| 5         | 1,00<br>0,03<br>0,49     | 1,39<br>0,05<br>0,30     | -0,02<br>0,01<br>0,41   | 0,42<br>0,04<br>0,29    | 0,01<br>0,02<br>0,74    | 0,27<br>0,06<br>0,43    | 0,03<br>7,01<br>0,74 | 0,28<br>31,49<br>0,57 |                       |                       |                       |                      |                       |                      |                       |                      |
| 10        | 0,38<br>0,01<br>0,43     | 0,76<br>0,02<br>0,34     | 0,00<br>0,00<br>0,14    | 0,23<br>0,02<br>0,16    | 0,04<br>0,01<br>0,04    | 0,11<br>0,02<br>0,03    | 0,00<br>0,01<br>0,09 | 0,11<br>0,04<br>0,08  | -0,03<br>2,79<br>0,85 | 0,25<br>8,07<br>0,56  |                       |                      |                       |                      |                       |                      |
| 20        | 0,10<br>0,00<br>0,43     | 0,55<br>0,01<br>0,29     | -0,02<br>0,00<br>0,08   | 0,17<br>0,02<br>0,08    | 0,00<br>0,00<br>0,01    | 0,07<br>0,02<br>0,01    | 0,06<br>0,03<br>0,02 | 0,01<br>0,03<br>0,13  | 0,08<br>0,06<br>0,11  | -0,08<br>2,13<br>0,73 | 0,24<br>5,40<br>0,59  |                      |                       |                      |                       |                      |
| 50        | 0,15<br>0,01<br>0,32     | 0,44<br>0,04<br>0,26     | 0,01<br>0,01<br>0,05    | 0,11<br>0,04<br>0,04    | 0,00<br>0,01<br>0,01    | 0,05<br>0,02<br>0,01    | 0,04<br>0,06<br>0,00 | 0,00<br>0,03<br>0,03  | 0,04<br>0,12<br>0,02  | 0,00<br>0,67<br>0,12  | 0,04<br>1,38<br>0,09  | 0,08<br>0,83<br>0,42 | -0,14<br>0,35<br>0,35 | 0,20<br>1,55<br>0,35 |                       |                      |
| 100       | 0,12<br>0,15<br>0,34     | 0,39<br>0,28<br>0,39     | 0,00<br>0,10<br>0,09    | 0,12<br>0,30<br>0,07    | 0,01<br>0,24<br>0,07    | 0,05<br>0,59<br>0,07    | 0,00<br>0,40<br>0,08 | 0,03<br>1,09<br>0,08  | -0,01<br>1,36<br>0,24 | 0,05<br>2,24<br>1,02  | -0,02<br>1,87<br>0,22 | 0,05<br>1,85<br>0,14 | -0,12<br>0,47<br>0,38 | 0,14<br>1,06<br>0,26 | -0,37<br>0,00<br>2,44 | 0,15<br>0,40<br>1,33 |

| $k=0,005$ | 0,2                     | 0,5                     | 1                      | 2                      | 5                       | 10                     | 20                     | 50                    |                        |                       |                       |                       |                       |                      |                       |                      |
|-----------|-------------------------|-------------------------|------------------------|------------------------|-------------------------|------------------------|------------------------|-----------------------|------------------------|-----------------------|-----------------------|-----------------------|-----------------------|----------------------|-----------------------|----------------------|
| 0,5       | 1,41<br>1449,88<br>6,01 | 1,00<br>2691,63<br>2,91 |                        |                        |                         |                        |                        |                       |                        |                       |                       |                       |                       |                      |                       |                      |
| 1         | 2,40<br>269,39<br>4,95  | 1,33<br>555,39<br>2,39  | 0,45<br>524,38<br>4,67 | 0,49<br>713,84<br>2,47 |                         |                        |                        |                       |                        |                       |                       |                       |                       |                      |                       |                      |
| 2         | 2,70<br>89,15<br>2,46   | 1,89<br>196,61<br>1,86  | 0,60<br>161,42<br>2,15 | 0,83<br>291,05<br>1,29 | -0,19<br>114,76<br>2,34 | 0,38<br>227,41<br>1,54 |                        |                       |                        |                       |                       |                       |                       |                      |                       |                      |
| 5         | 3,37<br>4,64<br>1,00    | 3,26<br>20,85<br>0,54   | 0,51<br>1,05<br>0,94   | 1,02<br>8,61<br>0,43   | 0,25<br>2,88<br>1,02    | 0,60<br>11,47<br>0,49  | -0,11<br>16,56<br>1,02 | 0,40<br>33,46<br>0,71 |                        |                       |                       |                       |                       |                      |                       |                      |
| 10        | 1,99<br>0,09<br>0,58    | 2,53<br>0,37<br>0,42    | 0,21<br>0,03<br>0,44   | 0,56<br>0,06<br>0,36   | 0,03<br>0,03<br>0,18    | 0,31<br>0,11<br>0,20   | 0,01<br>1,37<br>0,27   | 0,26<br>5,77<br>0,22  | -0,11<br>10,17<br>1,14 | 0,33<br>10,17<br>0,96 |                       |                       |                       |                      |                       |                      |
| 20        | 0,78<br>0,01<br>0,50    | 1,22<br>0,03<br>0,37    | 0,02<br>0,01<br>0,32   | 0,37<br>0,05<br>0,29   | -0,03<br>0,00<br>0,06   | 0,18<br>0,05<br>0,07   | 0,15<br>0,08<br>0,06   | 0,03<br>0,51<br>0,31  | 0,22<br>1,46<br>0,26   | -0,15<br>1,28<br>0,99 | 0,31<br>1,72<br>0,86  |                       |                       |                      |                       |                      |
| 50        | 0,60<br>0,11<br>0,45    | 0,97<br>0,49<br>0,32    | 0,05<br>0,07<br>0,22   | 0,30<br>0,16<br>0,21   | 0,00<br>0,05<br>0,04    | 0,14<br>0,15<br>0,10   | 0,03<br>0,97<br>0,06   | -0,01<br>1,60<br>0,15 | 0,10<br>2,76<br>0,11   | -0,07<br>2,06<br>0,32 | 0,19<br>2,64<br>0,20  | -0,18<br>3,59<br>0,72 | 0,28<br>4,81<br>0,71  |                      |                       |                      |
| 100       | -0,34<br>-0,15<br>1,30  | 0,67<br>0,46<br>0,48    | -0,28<br>0,07<br>0,61  | 0,29<br>0,57<br>0,44   | 0,00<br>1,42<br>0,19    | 0,08<br>1,78<br>0,17   | -0,01<br>2,29<br>0,21  | 0,08<br>2,73<br>0,18  | 0,03<br>4,01<br>0,31   | 0,06<br>3,84<br>0,23  | -0,08<br>5,63<br>0,51 | 0,11<br>4,58<br>0,38  | -0,18<br>1,44<br>1,05 | 0,28<br>2,38<br>1,27 | -0,44<br>0,61<br>3,14 | 0,15<br>0,83<br>1,71 |

| $k=0,01$ | 0,2                     | 0,5                     | 1                      | 2                      | 5                       | 10                     | 20                     | 50                    |                        |                       |                       |                      |                       |                      |                         |                      |
|----------|-------------------------|-------------------------|------------------------|------------------------|-------------------------|------------------------|------------------------|-----------------------|------------------------|-----------------------|-----------------------|----------------------|-----------------------|----------------------|-------------------------|----------------------|
| 0,5      | 1,67<br>1247,49<br>7,47 | 1,46<br>2315,46<br>4,32 |                        |                        |                         |                        |                        |                       |                        |                       |                       |                      |                       |                      |                         |                      |
| 1        | 2,60<br>449,51<br>6,37  | 1,72<br>702,63<br>3,72  | 0,60<br>309,42<br>6,60 | 0,66<br>596,41<br>4,13 |                         |                        |                        |                       |                        |                       |                       |                      |                       |                      |                         |                      |
| 2        | 2,40<br>110,86<br>5,65  | 1,71<br>236,01<br>4,09  | 0,43<br>234,18<br>4,78 | 0,76<br>407,67<br>4,83 | -0,29<br>149,60<br>6,13 | 0,38<br>302,43<br>5,97 |                        |                       |                        |                       |                       |                      |                       |                      |                         |                      |
| 5        | 5,79<br>19,23<br>1,96   | 3,88<br>44,00<br>1,51   | 1,06<br>19,87<br>1,43  | 1,37<br>45,63<br>0,63  | 0,18<br>19,63<br>1,38   | 0,71<br>46,86<br>0,66  | -0,14<br>35,15<br>1,93 | 0,40<br>53,62<br>1,86 |                        |                       |                       |                      |                       |                      |                         |                      |
| 10       | 6,12<br>4,44<br>1,12    | 5,45<br>11,35<br>1,42   | 0,81<br>0,20<br>0,83   | 1,23<br>0,39<br>0,47   | 0,28<br>3,11<br>0,69    | 0,68<br>9,98<br>0,39   | 0,11<br>5,27<br>0,59   | 0,47<br>12,77<br>0,40 | -0,14<br>12,09<br>2,51 | 0,28<br>17,39<br>2,43 |                       |                      |                       |                      |                         |                      |
| 20       | 4,81<br>1,21<br>0,70    | 6,35<br>3,59<br>1,11    | 0,37<br>0,07<br>0,56   | 0,74<br>0,15<br>0,43   | 0,04<br>0,06<br>0,22    | 0,32<br>0,11<br>0,26   | 0,08<br>3,01<br>0,15   | 0,28<br>4,11<br>0,50  | 0,03<br>5,52<br>0,79   | 0,29<br>2,40<br>0,90  | -0,22<br>2,30<br>2,80 | 0,30<br>4,00<br>2,80 |                       |                      |                         |                      |
| 50       | 2,37<br>1,40<br>0,60    | 5,22<br>2,96<br>0,90    | 0,16<br>1,15<br>0,52   | 0,60<br>2,80<br>0,42   | 0,04<br>1,86<br>0,17    | 0,25<br>3,46<br>0,16   | 0,02<br>4,39<br>0,17   | 0,19<br>6,64<br>0,18  | -0,05<br>6,86<br>0,34  | 0,20<br>6,88<br>0,18  | -0,18<br>4,90<br>0,58 | 0,25<br>5,93<br>0,45 | -0,25<br>1,25<br>2,84 | 0,21<br>1,66<br>2,62 |                         |                      |
| 100      | 1,71<br>0,34<br>1,16    | 10,84<br>1,37<br>0,64   | -0,16<br>1,10<br>0,81  | 0,40<br>1,73<br>0,55   | -0,03<br>3,15<br>0,28   | 0,21<br>2,99<br>0,19   | -0,04<br>5,50<br>0,33  | 0,14<br>4,54<br>0,23  | -0,08<br>7,46<br>0,44  | 0,12<br>5,44<br>0,25  | -0,20<br>4,65<br>0,58 | 0,18<br>4,11<br>0,21 | -0,24<br>0,87<br>3,70 | 0,23<br>0,87<br>3,92 | -0,21<br>-0,43<br>15,77 | 0,20<br>0,19<br>5,83 |

R=0.4

$\tau_1 \times \text{frame rate}$

| $k=0,001$                         |     | 0,2                     | 0,5                     | 1                     | 2                     | 5                     | 10                   | 20                    | 50                    |                      |
|-----------------------------------|-----|-------------------------|-------------------------|-----------------------|-----------------------|-----------------------|----------------------|-----------------------|-----------------------|----------------------|
| $\tau_1 \times \text{frame rate}$ | 0,5 | 0,72<br>1705,29<br>2,54 | 0,44<br>3809,26<br>0,73 |                       |                       |                       |                      |                       |                       |                      |
|                                   | 1   | 1,26<br>79,93<br>1,53   | 0,99<br>389,09<br>0,71  | 0,11<br>35,61<br>1,72 | 0,44<br>92,11<br>1,00 |                       |                      |                       |                       |                      |
|                                   | 2   | 1,29<br>0,22<br>0,73    | 1,39<br>0,30<br>0,36    | 0,09<br>0,24<br>0,83  | 0,50<br>0,30<br>0,38  | -0,22<br>1,30<br>0,79 | 0,37<br>3,14<br>0,59 |                       |                       |                      |
|                                   | 5   | 0,16<br>0,01<br>0,32    | 0,52<br>0,01<br>0,24    | -0,03<br>0,00<br>0,07 | 0,19<br>0,02<br>0,09  | -0,02<br>0,00<br>0,06 | 0,10<br>0,03<br>0,04 | -0,01<br>0,03<br>0,30 | 0,13<br>0,08<br>0,22  |                      |
|                                   | 10  | 0,02<br>0,00<br>0,25    | 0,32<br>0,01<br>0,18    | 0,01<br>0,00<br>0,02  | 0,09<br>0,01<br>0,02  | 0,01<br>0,00<br>0,01  | 0,04<br>0,01<br>0,04 | 0,00<br>0,00<br>0,43  | 0,04<br>0,12<br>0,31  |                      |
|                                   | 20  | 0,01<br>0,00<br>0,18    | 0,25<br>0,01<br>0,14    | 0,01<br>0,00<br>0,02  | 0,07<br>0,01<br>0,02  | 0,00<br>0,00<br>0,00  | 0,03<br>0,01<br>0,01 | 0,02<br>0,00<br>0,06  | -0,01<br>0,04<br>0,05 | 0,04<br>0,18<br>0,29 |
|                                   | 50  | -0,29<br>-0,03<br>0,36  | 0,16<br>0,02<br>0,16    | 0,00<br>0,01<br>0,02  | 0,04<br>0,02<br>0,01  | 0,00<br>0,00<br>0,01  | 0,02<br>0,03<br>0,00 | 0,00<br>0,01<br>0,01  | 0,00<br>0,05<br>0,05  | 0,04<br>0,14<br>0,26 |
|                                   | 100 | -0,77<br>-0,24<br>1,37  | 0,04<br>0,03<br>0,12    | -0,01<br>0,01<br>0,05 | 0,05<br>0,11<br>0,04  | 0,00<br>0,13<br>0,03  | 0,02<br>0,13<br>0,03 | 0,00<br>0,25<br>0,04  | 0,01<br>0,39<br>0,08  | 0,02<br>0,59<br>0,08 |

| $k=0,002$                         |     | 0,2                     | 0,5                     | 1                       | 2                       | 5                      | 10                      | 20                    | 50                    |                       |
|-----------------------------------|-----|-------------------------|-------------------------|-------------------------|-------------------------|------------------------|-------------------------|-----------------------|-----------------------|-----------------------|
| $\tau_1 \times \text{frame rate}$ | 0,5 | 0,98<br>6538,69<br>2,93 | 0,92<br>7970,71<br>0,81 |                         |                         |                        |                         |                       |                       |                       |
|                                   | 1   | 1,64<br>3512,71<br>1,87 | 1,42<br>5191,19<br>0,94 | 0,39<br>2067,51<br>2,26 | 0,32<br>3474,25<br>0,69 |                        |                         |                       |                       |                       |
|                                   | 2   | 2,37<br>496,85<br>1,01  | 1,81<br>2257,94<br>0,55 | 0,13<br>68,82<br>0,89   | 0,58<br>230,77<br>0,46  | 0,01<br>649,85<br>1,15 | 0,35<br>1236,48<br>0,69 |                       |                       |                       |
|                                   | 5   | 0,67<br>0,02<br>0,32    | 0,90<br>0,04<br>0,27    | 0,03<br>0,02<br>0,27    | 0,37<br>0,05<br>0,20    | 0,00<br>0,03<br>0,18   | 0,22<br>0,07<br>0,15    | -0,06<br>4,11<br>0,59 | 0,23<br>26,65<br>0,42 |                       |
|                                   | 10  | 0,15<br>0,00<br>0,42    | 0,56<br>0,02<br>0,25    | 0,01<br>0,00<br>0,07    | 0,20<br>0,02<br>0,06    | -0,02<br>0,01<br>0,03  | 0,09<br>0,02<br>0,10    | 0,02<br>0,05<br>0,07  | -0,04<br>4,90<br>0,59 | 0,20<br>14,12<br>0,44 |
|                                   | 20  | 0,17<br>0,00<br>0,30    | 0,44<br>0,02<br>0,22    | 0,00<br>0,00<br>0,05    | 0,11<br>0,02<br>0,04    | 0,01<br>0,00<br>0,01   | 0,06<br>0,03<br>0,02    | 0,04<br>0,10<br>0,14  | 0,01<br>0,04<br>0,10  | 0,08<br>3,33<br>0,40  |
|                                   | 50  | 0,11<br>0,02<br>0,23    | 0,35<br>0,05<br>0,20    | 0,00<br>0,01<br>0,05    | 0,10<br>0,05<br>0,04    | 0,00<br>0,01<br>0,02   | 0,03<br>0,06<br>0,01    | 0,03<br>0,15<br>0,02  | 0,00<br>0,60<br>0,12  | 0,03<br>1,16<br>0,09  |
|                                   | 100 | 0,50<br>0,24<br>0,56    | 4,51<br>0,70<br>0,96    | -0,01<br>0,27<br>0,10   | 0,09<br>0,81<br>0,09    | -0,01<br>1,00<br>0,40  | 0,08<br>1,00<br>1,71    | 0,01<br>0,85<br>0,13  | 0,03<br>1,47<br>0,13  | -0,01<br>1,76<br>0,38 |

| $k=0,005$                         |     | 0,2                     | 0,5                     | 1                      | 2                      | 5                       | 10                     | 20                     | 50                    |                       |
|-----------------------------------|-----|-------------------------|-------------------------|------------------------|------------------------|-------------------------|------------------------|------------------------|-----------------------|-----------------------|
| $\tau_1 \times \text{frame rate}$ | 0,5 | 1,20<br>1262,45<br>4,32 | 0,77<br>1940,50<br>2,17 |                        |                        |                         |                        |                        |                       |                       |
|                                   | 1   | 2,36<br>404,17<br>3,79  | 1,11<br>750,50<br>2,15  | 0,35<br>398,27<br>3,94 | 0,53<br>671,65<br>2,30 |                         |                        |                        |                       |                       |
|                                   | 2   | 2,38<br>112,30<br>1,55  | 1,68<br>229,17<br>0,95  | 0,36<br>101,30<br>1,57 | 0,71<br>214,76<br>1,11 | -0,23<br>166,11<br>2,21 | 0,40<br>329,31<br>1,73 |                        |                       |                       |
|                                   | 5   | 2,10<br>4,45<br>0,66    | 2,42<br>19,21<br>0,36   | 0,27<br>0,15<br>0,69   | 0,78<br>0,45<br>0,35   | 0,07<br>1,59<br>0,64    | 0,48<br>7,28<br>0,35   | -0,12<br>14,54<br>0,74 | 0,34<br>35,11<br>0,49 |                       |
|                                   | 10  | 1,26<br>0,04<br>0,45    | 1,60<br>0,05<br>0,32    | 0,09<br>0,02<br>0,31   | 0,46<br>0,06<br>0,31   | -0,03<br>0,01<br>0,12   | 0,26<br>0,07<br>0,13   | 0,04<br>0,29<br>0,22   | 0,20<br>11,56<br>0,18 | -0,15<br>6,52<br>0,90 |
|                                   | 20  | 0,66<br>0,03<br>0,31    | 0,83<br>0,04<br>0,27    | 0,05<br>0,01<br>0,16   | 0,28<br>0,06<br>0,18   | 0,00<br>0,01<br>0,03    | 0,14<br>0,06<br>0,02   | 0,01<br>0,09<br>0,07   | 0,13<br>0,09<br>0,05  | 0,00<br>0,88<br>0,29  |
|                                   | 50  | 0,33<br>0,07<br>0,50    | 0,85<br>0,19<br>0,33    | -0,03<br>0,07<br>0,16  | 0,22<br>0,19<br>0,14   | 0,00<br>0,18<br>0,05    | 0,11<br>0,52<br>0,33   | -0,01<br>0,33<br>1,01  | 0,07<br>2,40<br>0,15  | -0,01<br>3,26<br>0,35 |
|                                   | 100 | -0,43<br>-0,15<br>1,10  | 0,50<br>0,39<br>0,43    | -0,07<br>0,56<br>0,28  | 0,24<br>0,97<br>0,21   | -0,01<br>1,83<br>0,21   | 0,09<br>2,06<br>0,18   | 0,00<br>2,60<br>0,25   | 0,05<br>2,46<br>0,18  | -0,02<br>3,00<br>0,30 |

| $k=0,01$                          |     | 0,2                     | 0,5                     | 1                      | 2                      | 5                       | 10                     | 20                     | 50                    |                        |
|-----------------------------------|-----|-------------------------|-------------------------|------------------------|------------------------|-------------------------|------------------------|------------------------|-----------------------|------------------------|
| $\tau_1 \times \text{frame rate}$ | 0,5 | 1,34<br>1830,48<br>5,71 | 1,29<br>3179,45<br>3,69 |                        |                        |                         |                        |                        |                       |                        |
|                                   | 1   | 2,74<br>632,45<br>5,17  | 1,58<br>913,89<br>3,96  | 0,42<br>439,10<br>4,65 | 0,63<br>751,74<br>3,29 |                         |                        |                        |                       |                        |
|                                   | 2   | 2,17<br>190,02<br>5,39  | 1,74<br>350,32<br>5,01  | 0,32<br>149,03<br>4,83 | 0,60<br>295,82<br>5,18 | -0,25<br>188,13<br>6,09 | 0,33<br>308,45<br>5,68 |                        |                       |                        |
|                                   | 5   | 4,33<br>19,52<br>1,35   | 3,63<br>45,61<br>1,44   | 0,68<br>13,82<br>1,03  | 1,03<br>44,66<br>0,33  | 0,13<br>24,14<br>0,88   | 0,57<br>54,61<br>0,40  | -0,09<br>44,12<br>1,59 | 0,39<br>75,59<br>1,59 |                        |
|                                   | 10  | 3,44<br>2,95<br>0,64    | 3,71<br>9,58<br>0,73    | 0,29<br>0,87<br>0,68   | 0,87<br>4,65<br>0,44   | 0,11<br>1,43<br>0,41    | 0,51<br>5,52<br>0,27   | 0,04<br>3,99<br>0,36   | 0,34<br>11,58<br>0,27 | -0,25<br>13,95<br>1,88 |
|                                   | 20  | 2,93<br>0,88<br>0,44    | 4,90<br>4,06<br>0,31    | 0,12<br>0,05<br>0,40   | 0,55<br>0,13<br>0,31   | 0,08<br>0,57<br>0,13    | 0,32<br>2,86<br>0,15   | 0,01<br>1,06<br>0,12   | 0,22<br>4,50<br>0,11  | -0,06<br>5,45<br>0,31  |
|                                   | 50  | 1,30<br>1,27<br>0,54    | 2,00<br>2,44<br>0,41    | 0,11<br>1,18<br>0,39   | 0,42<br>2,24<br>0,30   | 0,04<br>1,78<br>0,16    | 0,20<br>3,21<br>0,17   | -0,01<br>3,03<br>0,16  | 0,13<br>5,14<br>0,19  | -0,04<br>5,68<br>0,34  |
|                                   | 100 | 1,02<br>0,75<br>1,02    | 1,26<br>1,63<br>0,58    | -0,16<br>1,38<br>0,55  | 0,36<br>1,80<br>0,40   | -0,04<br>3,99<br>0,34   | 0,15<br>3,40<br>0,24   | -0,03<br>4,86<br>0,36  | 0,11<br>3,41<br>0,24  | -0,08<br>5,97<br>0,46  |

R=0.5

$\tau_1 \times \text{frame rate}$

| $k=0,001$ | 0,2                     | 0,5                     | 1                     | 2                      | 5                     | 10                   | 20                   | 50                    |                       |                       |                      |                        |                      |
|-----------|-------------------------|-------------------------|-----------------------|------------------------|-----------------------|----------------------|----------------------|-----------------------|-----------------------|-----------------------|----------------------|------------------------|----------------------|
| 0,5       | 0,73<br>1521,29<br>2,26 | 0,49<br>3292,46<br>0,88 |                       |                        |                       |                      |                      |                       |                       |                       |                      |                        |                      |
| 1         | 0,94<br>25,53<br>1,09   | 0,87<br>85,04<br>0,58   | 0,02<br>30,72<br>1,26 | 0,40<br>111,16<br>0,91 |                       |                      |                      |                       |                       |                       |                      |                        |                      |
| 2         | 0,92<br>0,20<br>0,51    | 1,00<br>0,37<br>0,28    | 0,01<br>0,26<br>0,61  | 0,43<br>0,43<br>0,30   | -0,25<br>1,24<br>0,61 | 0,36<br>2,10<br>0,50 |                      |                       |                       |                       |                      |                        |                      |
| 5         | 0,08<br>0,01<br>0,28    | 0,49<br>0,02<br>0,20    | -0,02<br>0,00<br>0,05 | 0,16<br>0,03<br>0,04   | 0,01<br>0,04<br>0,07  | 0,09<br>0,10<br>0,06 |                      |                       |                       |                       |                      |                        |                      |
| 10        | 0,04<br>0,00<br>0,19    | 0,28<br>0,01<br>0,15    | 0,00<br>0,00<br>0,02  | 0,06<br>0,01<br>0,02   | 0,04<br>0,02<br>0,01  | 0,00<br>0,03<br>0,05 | 0,04<br>0,13<br>0,42 | -0,02<br>0,11<br>0,34 |                       |                       |                      |                        |                      |
| 20        | 0,01<br>0,00<br>0,12    | 0,18<br>0,01<br>0,09    | 0,01<br>0,00<br>0,02  | 0,05<br>0,01<br>0,01   | 0,06<br>0,02<br>0,00  | 0,09<br>0,02<br>0,01 | 0,00<br>0,04<br>0,06 | 0,03<br>-0,04<br>0,41 | 0,10<br>0,21<br>0,31  |                       |                      |                        |                      |
| 50        | -0,35<br>-0,06<br>0,40  | 0,13<br>0,02<br>0,16    | 0,00<br>0,00<br>0,02  | 0,04<br>0,03<br>0,02   | 0,00<br>0,02<br>0,01  | 0,01<br>0,05<br>0,01 | 0,00<br>0,07<br>0,05 | 0,03<br>0,19<br>0,04  | -0,10<br>0,01<br>0,46 | 0,11<br>0,17<br>0,34  |                      |                        |                      |
| 100       | -0,72<br>-0,30<br>1,10  | 0,04<br>0,03<br>0,08    | 0,00<br>0,05<br>0,05  | 0,04<br>0,15<br>0,04   | 0,00<br>0,22<br>0,05  | 0,01<br>0,38<br>0,06 | 0,00<br>0,44<br>0,10 | 0,01<br>0,77<br>0,10  | 0,00<br>0,58<br>0,09  | 0,02<br>-0,26<br>0,23 | 0,05<br>0,10<br>0,18 | -0,15<br>-0,38<br>3,58 | 0,07<br>0,07<br>1,80 |

| $k=0,002$ | 0,2                     | 0,5                     | 1                       | 2                       | 5                       | 10                      | 20                    | 50                    |                       |                      |                       |                      |                        |                      |
|-----------|-------------------------|-------------------------|-------------------------|-------------------------|-------------------------|-------------------------|-----------------------|-----------------------|-----------------------|----------------------|-----------------------|----------------------|------------------------|----------------------|
| 0,5       | 0,90<br>3587,82<br>2,44 | 0,54<br>6113,70<br>0,68 |                         |                         |                         |                         |                       |                       |                       |                      |                       |                      |                        |                      |
| 1         | 1,81<br>5535,72<br>1,57 | 1,10<br>7788,99<br>0,54 | 0,31<br>1049,54<br>1,99 | 0,47<br>1760,62<br>0,79 |                         |                         |                       |                       |                       |                      |                       |                      |                        |                      |
| 2         | 1,39<br>60,30<br>0,69   | 1,42<br>227,15<br>0,37  | 0,19<br>29,04<br>0,79   | 0,54<br>204,60<br>0,42  | -0,02<br>975,97<br>0,85 | 0,33<br>1403,27<br>0,56 |                       |                       |                       |                      |                       |                      |                        |                      |
| 5         | 0,42<br>0,02<br>0,35    | 0,89<br>0,05<br>0,24    | 0,03<br>0,02<br>0,19    | 0,31<br>0,05<br>0,15    | -0,01<br>0,02<br>0,12   | 0,16<br>0,07<br>0,09    | -0,06<br>0,14<br>0,41 | 0,18<br>0,25<br>0,31  |                       |                      |                       |                      |                        |                      |
| 10        | 0,25<br>0,01<br>0,33    | 0,59<br>0,02<br>0,22    | 0,00<br>0,00<br>0,06    | 0,16<br>0,03<br>0,06    | -0,01<br>0,00<br>0,03   | 0,08<br>0,04<br>0,02    | 0,00<br>0,05<br>0,08  | 0,07<br>10,35<br>0,38 | -0,04<br>3,93<br>0,55 | 0,18<br>0,10<br>0,38 |                       |                      |                        |                      |
| 20        | 0,10<br>0,01<br>0,28    | 0,42<br>0,02<br>0,18    | 0,00<br>0,00<br>0,04    | 0,11<br>0,03<br>0,03    | 0,00<br>0,01<br>0,01    | 0,05<br>0,03<br>0,02    | 0,04<br>0,04<br>0,14  | 0,07<br>0,11<br>0,10  | -0,01<br>1,77<br>0,49 | 0,07<br>2,43<br>0,34 | -0,08<br>0,16         |                      |                        |                      |
| 50        | 0,04<br>0,02<br>0,25    | 0,32<br>0,06<br>0,17    | -0,06<br>-0,01<br>0,97  | 0,16<br>0,07<br>2,70    | 0,00<br>0,08<br>0,02    | 0,03<br>0,03<br>0,01    | 0,00<br>0,09<br>0,01  | 0,03<br>0,04<br>0,04  | 0,00<br>1,02<br>0,18  | 0,03<br>1,76<br>0,12 | -0,18<br>1,47<br>0,68 | 0,19<br>2,49<br>0,43 |                        |                      |
| 100       | -0,03<br>0,55<br>0,90   | 0,36<br>1,02<br>1,75    | -0,05<br>0,89<br>1,42   | 0,22<br>1,36<br>3,81    | 0,00<br>0,62<br>0,12    | 0,03<br>1,27<br>0,14    | 0,00<br>1,19<br>0,17  | 0,03<br>2,13<br>0,22  | 0,00<br>1,92<br>0,30  | 0,02<br>2,28<br>0,20 | -0,02<br>1,96<br>0,30 | 0,03<br>1,72<br>0,35 | -0,13<br>-0,13<br>2,51 | 0,13<br>0,30<br>0,84 |

| $k=0,005$ | 0,2                     | 0,5                     | 1                      | 2                      | 5                       | 10                     | 20                     | 50                    |                       |                       |                       |                      |                       |                      |
|-----------|-------------------------|-------------------------|------------------------|------------------------|-------------------------|------------------------|------------------------|-----------------------|-----------------------|-----------------------|-----------------------|----------------------|-----------------------|----------------------|
| 0,5       | 0,84<br>1360,28<br>3,46 | 0,97<br>2167,32<br>2,19 |                        |                        |                         |                        |                        |                       |                       |                       |                       |                      |                       |                      |
| 1         | 1,84<br>512,28<br>2,97  | 1,19<br>867,88<br>2,12  | 0,28<br>478,43<br>3,12 | 0,51<br>791,67<br>1,82 |                         |                        |                        |                       |                       |                       |                       |                      |                       |                      |
| 2         | 2,03<br>139,38<br>1,53  | 1,85<br>267,27<br>1,44  | 0,07<br>134,06<br>1,20 | 0,61<br>275,58<br>0,61 | -0,32<br>140,11<br>2,27 | 0,37<br>292,50<br>1,82 |                        |                       |                       |                       |                       |                      |                       |                      |
| 5         | 1,49<br>1,83<br>0,49    | 1,76<br>12,63<br>0,28   | 0,22<br>0,15<br>0,54   | 0,64<br>0,26<br>0,28   | 0,02<br>3,71<br>0,44    | 0,41<br>17,88<br>0,30  | -0,12<br>21,00<br>0,53 | 0,30<br>41,49<br>0,36 |                       |                       |                       |                      |                       |                      |
| 10        | 0,77<br>0,04<br>0,41    | 1,33<br>0,08<br>0,26    | 0,02<br>0,02<br>0,26   | 0,38<br>0,09<br>0,24   | -0,01<br>0,02<br>0,08   | 0,18<br>0,09<br>0,07   | 0,00<br>0,12<br>0,19   | 0,16<br>0,25<br>0,16  | -0,17<br>7,62<br>0,70 | 0,28<br>12,00<br>0,51 |                       |                      |                       |                      |
| 20        | 0,48<br>0,04<br>0,39    | 0,85<br>0,05<br>0,32    | 0,02<br>0,01<br>0,14   | 0,27<br>0,07<br>0,15   | 0,01<br>0,02<br>0,02    | 0,11<br>0,08<br>0,02   | 0,00<br>0,15<br>0,05   | 0,10<br>0,15<br>0,05  | -0,02<br>0,79<br>0,24 | 0,13<br>2,34<br>0,17  | -0,24<br>1,05<br>0,85 | 0,25<br>1,61<br>0,80 |                       |                      |
| 50        | 0,14<br>0,13<br>0,49    | 0,74<br>0,47<br>0,34    | 0,01<br>0,36<br>0,13   | 0,19<br>1,02<br>0,12   | 0,01<br>0,36<br>0,07    | 0,09<br>1,26<br>0,09   | 0,00<br>0,79<br>0,09   | 0,06<br>1,80<br>0,13  | 0,00<br>2,99<br>0,24  | 0,06<br>3,73<br>0,20  | -0,11<br>2,11<br>0,49 | 0,13<br>2,35<br>0,28 | -0,22<br>4,72<br>1,37 | 0,20<br>6,41<br>0,96 |
| 100       | -0,36<br>-0,09<br>0,90  | 0,54<br>0,45<br>0,45    | -0,05<br>1,39<br>2,25  | 0,17<br>1,51<br>2,21   | -0,02<br>2,28<br>0,28   | 0,07<br>2,30<br>0,21   | -0,02<br>2,89<br>0,32  | 0,05<br>2,86<br>0,24  | -0,03<br>3,38<br>0,37 | 0,04<br>2,60<br>0,23  | -0,09<br>4,02<br>0,58 | 0,09<br>2,83<br>0,33 | 1,16<br>3,00<br>1,16  | 0,59<br>3,37<br>1,42 |

| $k=0,01$ | 0,2                     | 0,5                     | 1                      | 2                      | 5                       | 10                     | 20                     | 50                    |                        |                       |                       |                      |                       |                      |
|----------|-------------------------|-------------------------|------------------------|------------------------|-------------------------|------------------------|------------------------|-----------------------|------------------------|-----------------------|-----------------------|----------------------|-----------------------|----------------------|
| 0,5      | 1,64<br>1033,72<br>5,83 | 1,32<br>1885,19<br>3,79 |                        |                        |                         |                        |                        |                       |                        |                       |                       |                      |                       |                      |
| 1        | 2,31<br>580,99<br>4,69  | 1,62<br>775,96<br>3,36  | 0,46<br>602,03<br>4,77 | 0,67<br>923,59<br>3,41 |                         |                        |                        |                       |                        |                       |                       |                      |                       |                      |
| 2        | 1,87<br>159,31<br>5,03  | 1,54<br>254,97<br>4,30  | 0,04<br>129,71<br>4,45 | 0,54<br>288,47<br>4,82 | -0,34<br>198,74<br>6,40 | 0,36<br>374,24<br>5,96 |                        |                       |                        |                       |                       |                      |                       |                      |
| 5        | 3,32<br>22,19<br>0,87   | 3,47<br>52,35<br>0,77   | 0,21<br>4,71<br>0,80   | 0,82<br>21,47<br>0,33  | -0,02<br>18,01<br>0,73  | 0,48<br>45,11<br>0,45  | -0,16<br>41,96<br>1,46 | 0,35<br>65,72<br>1,94 |                        |                       |                       |                      |                       |                      |
| 10       | 2,81<br>2,13<br>0,53    | 3,38<br>8,89<br>0,35    | 0,10<br>0,14<br>0,58   | 0,74<br>0,43<br>0,36   | -0,02<br>0,71<br>0,30   | 0,38<br>5,95<br>0,24   | -0,03<br>6,36<br>0,31  | 0,30<br>15,80<br>0,22 | -0,25<br>14,35<br>1,73 | 0,28<br>19,72<br>2,17 |                       |                      |                       |                      |
| 20       | 1,41<br>0,38<br>0,44    | 2,06<br>1,85<br>0,30    | 0,18<br>0,11<br>0,34   | 0,54<br>0,27<br>0,30   | 0,04<br>0,87<br>0,09    | 0,28<br>3,59<br>0,09   | -0,01<br>1,33<br>0,11  | 0,19<br>4,05<br>0,09  | -0,09<br>6,84<br>0,40  | 0,23<br>9,75<br>0,27  | -0,29<br>4,66<br>2,18 | 0,24<br>6,82<br>2,27 |                       |                      |
| 50       | 0,66<br>1,08<br>0,57    | 1,25<br>1,94<br>0,39    | 0,01<br>2,46<br>0,36   | 0,38<br>3,47<br>0,27   | -0,03<br>2,92<br>0,21   | 0,17<br>4,26<br>0,21   | -0,01<br>4,93<br>0,29  | 0,11<br>5,58<br>0,26  | -0,06<br>8,02<br>0,51  | 0,13<br>7,06<br>0,27  | -0,16<br>5,05<br>0,68 | 0,21<br>4,94<br>0,34 | -0,33<br>1,23<br>3,39 | 0,19<br>2,44<br>2,94 |
| 100      | 0,01<br>0,50<br>0,82    | 0,83<br>1,07<br>0,47    | -0,06<br>2,48<br>0,41  | 0,32<br>2,52<br>0,32   | -0,06<br>4,30<br>0,40   | 0,15<br>3,22<br>0,24   | -0,05<br>4,31<br>0,24  | 0,10<br>3,76<br>0,27  | -0,07<br>5,26<br>0,52  | 0,10<br>3,96<br>0,28  | -0,18<br>3,43<br>0,70 | 0,17<br>2,69<br>0,29 | -0,36<br>1,52<br>2,95 | 0,19<br>0,30<br>2,75 |

R=0.6

$\tau_1 \times \text{frame rate}$

| $k=0,001$ | 0,2                     | 0,5                     | 1                       | 2                      | 5                     | 10                   | 20                    | 50                   |
|-----------|-------------------------|-------------------------|-------------------------|------------------------|-----------------------|----------------------|-----------------------|----------------------|
| 0,5       | 0,58<br>1685,22<br>1,97 | 0,54<br>3945,57<br>0,86 |                         |                        |                       |                      |                       |                      |
| 1         | 0,75<br>74,68<br>0,91   | 0,71<br>319,16<br>0,41  | -0,09<br>146,74<br>0,93 | 0,34<br>818,44<br>0,69 |                       |                      |                       |                      |
| 2         | 0,59<br>0,15<br>0,43    | 0,80<br>0,19<br>0,21    | -0,05<br>0,21<br>0,46   | 0,39<br>0,30<br>0,27   | -0,16<br>2,36<br>0,61 | 0,29<br>5,72<br>0,39 |                       |                      |
| 5         | 0,03<br>0,00<br>0,24    | 0,42<br>0,03<br>0,19    | -0,02<br>0,00<br>0,03   | 0,13<br>0,03<br>0,03   | 0,01<br>0,02<br>0,07  | 0,07<br>0,05<br>0,06 | -0,02<br>0,05<br>0,27 | 0,09<br>0,11<br>0,20 |
| 10        | 0,02<br>0,00<br>0,18    | 0,29<br>0,02<br>0,14    | 0,00<br>0,00<br>0,01    | 0,06<br>0,02<br>0,01   | 0,01<br>0,01<br>0,02  | 0,04<br>0,02<br>0,01 | 0,00<br>0,00<br>0,05  | 0,03<br>0,03<br>0,03 |
| 20        | 0,01<br>0,00<br>0,11    | 0,16<br>0,01<br>0,09    | 0,00<br>0,00<br>0,01    | 0,04<br>0,02<br>0,01   | 0,00<br>0,00<br>0,01  | 0,02<br>0,01<br>0,01 | 0,00<br>0,01<br>0,07  | 0,03<br>0,06<br>0,05 |
| 50        | -0,35<br>-0,09<br>0,37  | 0,10<br>0,02<br>0,11    | 0,00<br>0,01<br>0,02    | 0,03<br>0,04<br>0,01   | 0,00<br>0,02<br>0,01  | 0,02<br>0,06<br>0,01 | 0,00<br>0,10<br>0,08  | 0,01<br>0,27<br>0,05 |
| 100       | -0,64<br>-0,37<br>0,88  | 0,06<br>0,03<br>0,10    | 0,00<br>0,15<br>0,07    | 0,03<br>0,28<br>0,06   | 0,00<br>0,22<br>0,08  | 0,02<br>0,48<br>0,08 | 0,00<br>0,30<br>0,10  | 0,01<br>0,57<br>0,09 |

| $k=0,002$ | 0,2                      | 0,5                      | 1                       | 2                       | 5                        | 10                      | 20                    | 50                    |
|-----------|--------------------------|--------------------------|-------------------------|-------------------------|--------------------------|-------------------------|-----------------------|-----------------------|
| 0,5       | 0,85<br>13891,70<br>2,26 | 0,71<br>37241,24<br>0,79 |                         |                         |                          |                         |                       |                       |
| 1         | 1,62<br>4801,07<br>1,41  | 1,04<br>4966,46<br>0,57  | 0,25<br>1444,78<br>1,60 | 0,29<br>3505,16<br>0,65 |                          |                         |                       |                       |
| 2         | 1,25<br>70,78<br>0,61    | 1,32<br>235,86<br>0,29   | 0,07<br>92,77<br>0,64   | 0,47<br>369,64<br>0,36  | -0,02<br>1436,05<br>0,75 | 0,29<br>2038,43<br>0,49 |                       |                       |
| 5         | 0,48<br>0,04<br>0,28     | 0,72<br>0,05<br>0,20     | -0,04<br>0,00<br>0,15   | 0,27<br>0,07<br>0,12    | -0,02<br>0,03<br>0,14    | 0,16<br>0,09<br>0,10    | -0,07<br>2,32<br>0,45 | 0,19<br>19,65<br>0,28 |
| 10        | 0,11<br>0,01<br>0,27     | 0,43<br>0,03<br>0,20     | 0,01<br>0,00<br>0,03    | 0,13<br>0,04<br>0,03    | 0,00<br>0,01<br>0,03     | 0,06<br>0,04<br>0,02    | 0,00<br>0,01<br>0,12  | 0,05<br>0,12<br>0,09  |
| 20        | 0,03<br>0,00<br>0,24     | 0,36<br>0,03<br>0,19     | 0,00<br>0,00<br>0,03    | 0,09<br>0,03<br>0,03    | 0,00<br>0,01<br>0,01     | 0,04<br>0,04<br>0,01    | 0,03<br>0,06<br>0,02  | 0,00<br>0,05<br>0,12  |
| 50        | 0,01<br>0,03<br>0,20     | 0,29<br>0,09<br>0,16     | 0,00<br>0,02<br>0,04    | 0,08<br>0,09<br>0,04    | 0,00<br>0,03<br>0,02     | 0,02<br>0,10<br>0,02    | 0,00<br>0,62<br>0,07  | 0,02<br>1,66<br>0,12  |
| 100       | -0,01<br>0,99<br>0,31    | 0,27<br>1,35<br>0,22     | 0,00<br>0,98<br>0,18    | 0,06<br>1,47<br>0,16    | 0,00<br>1,30<br>0,19     | 0,03<br>1,71<br>0,18    | 0,00<br>2,05<br>0,27  | 0,02<br>2,26<br>0,24  |

| $k=0,005$ | 0,2                     | 0,5                     | 1                      | 2                      | 5                       | 10                     | 20                     | 50                    |
|-----------|-------------------------|-------------------------|------------------------|------------------------|-------------------------|------------------------|------------------------|-----------------------|
| 0,5       | 1,12<br>1401,90<br>4,09 | 1,04<br>2167,49<br>2,66 |                        |                        |                         |                        |                        |                       |
| 1         | 1,68<br>505,63<br>2,82  | 1,14<br>875,58<br>2,21  | 0,24<br>548,09<br>3,16 | 0,47<br>893,42<br>2,25 |                         |                        |                        |                       |
| 2         | 1,47<br>97,62<br>1,51   | 1,39<br>218,54<br>1,62  | 0,02<br>100,04<br>1,24 | 0,56<br>268,11<br>1,45 | -0,31<br>162,06<br>2,55 | 0,31<br>333,02<br>2,67 |                        |                       |
| 5         | 1,34<br>0,98<br>0,44    | 1,65<br>7,47<br>0,25    | 0,15<br>0,22<br>0,42   | 0,45<br>0,45<br>0,21   | -0,03<br>2,51<br>0,32   | 0,30<br>9,95<br>0,24   | -0,22<br>23,56<br>0,53 | 0,32<br>49,85<br>0,48 |
| 10        | 0,67<br>0,06<br>0,34    | 1,03<br>0,08<br>0,29    | 0,01<br>0,03<br>0,17   | 0,31<br>0,09<br>0,16   | 0,02<br>0,06<br>0,08    | 0,15<br>0,12<br>0,07   | -0,01<br>0,16<br>0,24  | 0,16<br>4,88<br>0,15  |
| 20        | 0,29<br>0,04<br>0,36    | 0,72<br>0,08<br>0,27    | 0,01<br>0,03<br>0,11   | 0,24<br>0,09<br>0,11   | 0,00<br>0,04<br>0,02    | 0,11<br>0,12<br>0,02   | -0,01<br>0,14<br>0,06  | 0,08<br>1,63<br>0,28  |
| 50        | 0,11<br>0,22<br>0,45    | 0,60<br>0,72<br>0,29    | -0,02<br>0,55<br>0,16  | 0,18<br>1,25<br>0,14   | 0,00<br>1,14<br>0,13    | 0,07<br>2,15<br>0,16   | 0,00<br>2,21<br>0,20   | 0,05<br>3,14<br>0,20  |
| 100       | -0,29<br>0,01<br>0,71   | 0,47<br>0,56<br>0,41    | -0,05<br>1,81<br>0,31  | 0,16<br>1,88<br>0,24   | 0,00<br>3,32<br>0,40    | 0,07<br>2,68<br>0,28   | -0,01<br>2,94<br>0,34  | 0,03<br>2,53<br>0,25  |

| $k=0,01$ | 0,2                     | 0,5                     | 1                       | 2                      | 5                       | 10                     | 20                     | 50                    |
|----------|-------------------------|-------------------------|-------------------------|------------------------|-------------------------|------------------------|------------------------|-----------------------|
| 0,5      | 1,69<br>1325,84<br>5,86 | 1,51<br>2576,14<br>4,41 |                         |                        |                         |                        |                        |                       |
| 1        | 2,28<br>634,50<br>4,53  | 1,40<br>1476,26<br>3,45 | 0,35<br>654,50<br>4,35  | 0,67<br>905,40<br>3,59 |                         |                        |                        |                       |
| 2        | 1,54<br>178,63<br>5,05  | 1,33<br>289,84<br>4,76  | -0,02<br>192,63<br>5,83 | 0,44<br>307,73<br>5,86 | -0,38<br>189,21<br>6,59 | 0,29<br>292,32<br>6,45 |                        |                       |
| 5        | 2,45<br>19,11<br>0,61   | 2,24<br>53,28<br>0,30   | 0,44<br>21,24<br>0,66   | 0,84<br>45,92<br>0,28  | -0,03<br>19,18<br>0,55  | 0,41<br>42,37<br>0,25  | -0,25<br>55,17<br>1,09 | 0,34<br>81,20<br>1,53 |
| 10       | 1,88<br>1,40<br>0,36    | 2,02<br>6,59<br>0,31    | 0,09<br>0,18<br>0,41    | 0,47<br>0,57<br>0,27   | -0,06<br>1,22<br>0,23   | 0,34<br>6,84<br>0,17   | -0,03<br>10,41<br>0,26 | 0,27<br>17,82<br>2,36 |
| 20       | 0,98<br>0,37<br>0,44    | 1,51<br>1,50<br>0,34    | -0,05<br>0,31<br>0,30   | 0,39<br>2,29<br>0,26   | -0,01<br>0,48<br>0,06   | 0,19<br>2,17<br>0,08   | -0,02<br>2,07<br>0,15  | 0,15<br>5,38<br>0,10  |
| 50       | 0,45<br>1,38<br>0,52    | 0,95<br>1,96<br>0,32    | -0,03<br>3,44<br>0,35   | 0,33<br>3,76<br>0,25   | -0,02<br>5,37<br>0,35   | 0,14<br>6,17<br>0,30   | -0,02<br>6,17<br>0,40  | 0,09<br>6,39<br>0,32  |
| 100      | -0,08<br>0,63<br>0,74   | 0,76<br>1,26<br>0,43    | -0,12<br>3,26<br>0,45   | 0,26<br>2,97<br>0,28   | -0,05<br>4,94<br>0,46   | 0,12<br>4,00<br>0,33   | -0,05<br>5,52<br>0,50  | 0,08<br>4,13<br>0,34  |

R=0.7

$\tau_1 \times \text{frame rate}$

| $k=0,001$ | 0,2                     | 0,5                     | 1                       | 2                       | 5                     | 10                   | 20                    | 50                    |
|-----------|-------------------------|-------------------------|-------------------------|-------------------------|-----------------------|----------------------|-----------------------|-----------------------|
| 0,5       | 0,48<br>1846,01<br>1,76 | 0,45<br>3715,97<br>0,91 |                         |                         |                       |                      |                       |                       |
| 1         | 0,65<br>219,09<br>0,82  | 0,68<br>839,24<br>0,46  | -0,06<br>318,16<br>1,06 | 0,31<br>1027,13<br>0,76 |                       |                      |                       |                       |
| 2         | 0,60<br>0,24<br>0,43    | 0,81<br>0,30<br>0,19    | -0,09<br>0,35<br>0,36   | 0,35<br>0,57<br>0,25    | -0,23<br>2,45<br>0,62 | 0,28<br>6,31<br>0,41 |                       |                       |
| 5         | 0,14<br>0,02<br>0,20    | 0,37<br>0,04<br>0,13    | -0,01<br>0,01<br>0,03   | 0,12<br>0,05<br>0,03    | 0,00<br>0,06<br>0,09  | 0,07<br>0,19<br>0,25 |                       |                       |
| 10        | 0,01<br>0,00<br>0,15    | 0,24<br>0,02<br>0,12    | 0,00<br>0,00<br>0,01    | 0,05<br>0,02<br>0,01    | 0,00<br>0,01<br>0,06  | 0,03<br>0,05<br>0,04 | -0,04<br>0,21<br>0,52 | 0,08<br>0,36<br>0,37  |
| 20        | -0,01<br>0,00<br>0,13   | 0,19<br>0,02<br>0,09    | 0,00<br>0,00<br>0,01    | 0,04<br>0,02<br>0,01    | 0,00<br>0,00<br>0,01  | 0,01<br>0,03<br>0,06 | 0,01<br>0,08<br>0,06  | -0,01<br>0,12<br>0,71 |
| 50        | -0,26<br>-0,10<br>0,29  | 0,17<br>0,05<br>0,15    | 0,00<br>0,01<br>0,02    | 0,03<br>0,05<br>0,01    | 0,00<br>0,01<br>0,01  | 0,01<br>0,06<br>0,01 | 0,00<br>0,26<br>0,03  | 0,01<br>0,30<br>0,07  |
| 100       | -0,52<br>-0,45<br>0,68  | 0,09<br>0,02<br>0,10    | 0,00<br>0,34<br>0,12    | 0,03<br>0,61<br>0,12    | 0,00<br>0,73<br>0,13  | 0,00<br>0,67<br>0,16 | 0,01<br>1,08<br>0,16  | 0,00<br>0,85<br>0,19  |

| $k=0,002$ | 0,2                     | 0,5                      | 1                       | 2                       | 5                       | 10                      | 20                    | 50                    |
|-----------|-------------------------|--------------------------|-------------------------|-------------------------|-------------------------|-------------------------|-----------------------|-----------------------|
| 0,5       | 0,59<br>8171,46<br>2,26 | 0,80<br>11549,43<br>1,28 |                         |                         |                         |                         |                       |                       |
| 1         | 1,18<br>4408,33<br>1,28 | 0,69<br>5253,39<br>0,66  | 0,20<br>2043,45<br>1,74 | 0,41<br>4241,61<br>0,89 |                         |                         |                       |                       |
| 2         | 0,86<br>93,72<br>0,49   | 0,99<br>299,53<br>0,24   | -0,06<br>130,77<br>0,44 | 0,38<br>351,41<br>0,27  | -0,07<br>939,99<br>0,79 | 0,30<br>1390,53<br>0,51 |                       |                       |
| 5         | 0,28<br>0,04<br>0,28    | 0,67<br>0,08<br>0,20     | 0,00<br>0,03<br>0,13    | 0,24<br>0,10<br>0,12    | -0,02<br>0,05<br>0,17   | 0,13<br>0,13<br>0,11    |                       |                       |
| 10        | 0,14<br>0,02<br>0,25    | 0,43<br>0,04<br>0,18     | -0,01<br>0,00<br>0,03   | 0,13<br>0,05<br>0,04    | 0,00<br>0,01<br>0,04    | 0,05<br>0,10<br>0,08    | -0,01<br>7,76<br>0,68 | 0,14<br>19,98<br>0,50 |
| 20        | 0,03<br>0,01<br>0,17    | 0,25<br>0,04<br>0,14     | 0,01<br>0,01<br>0,02    | 0,08<br>0,04<br>0,02    | 0,00<br>0,05<br>0,01    | 0,03<br>0,07<br>0,02    | -0,01<br>2,27<br>0,14 | 0,04<br>1,44<br>0,12  |
| 50        | -0,06<br>0,01<br>0,20   | 0,25<br>0,11<br>0,15     | 0,00<br>0,07<br>0,05    | 0,06<br>0,15<br>0,04    | 0,00<br>0,21<br>0,05    | 0,02<br>0,66<br>0,07    | 0,00<br>1,19<br>0,15  | 0,02<br>2,24<br>0,17  |
| 100       | 0,03<br>1,88<br>0,39    | 0,24<br>2,30<br>0,31     | -0,01<br>2,14<br>0,31   | 0,05<br>2,76<br>0,26    | -0,01<br>2,50<br>0,33   | 0,03<br>2,57<br>0,26    | 0,00<br>2,50<br>0,35  | 0,02<br>2,33<br>0,25  |

| $k=0,005$ | 0,2                     | 0,5                     | 1                      | 2                      | 5                       | 10                     | 20                   | 50                   |
|-----------|-------------------------|-------------------------|------------------------|------------------------|-------------------------|------------------------|----------------------|----------------------|
| 0,5       | 0,92<br>1954,94<br>3,97 | 0,98<br>3236,63<br>2,79 |                        |                        |                         |                        |                      |                      |
| 1         | 1,52<br>618,59<br>3,17  | 1,17<br>1027,02<br>2,58 | 0,16<br>556,45<br>3,14 | 0,46<br>948,24<br>2,43 |                         |                        |                      |                      |
| 2         | 1,12<br>111,08<br>1,82  | 1,15<br>213,61<br>2,63  | -0,09<br>83,53<br>1,28 | 0,49<br>164,96<br>2,04 | -0,38<br>132,65<br>2,99 | 0,28<br>234,59<br>3,04 |                      |                      |
| 5         | 1,09<br>0,55<br>0,36    | 1,29<br>2,75<br>0,23    | 0,00<br>0,55<br>0,41   | 0,41<br>3,49<br>0,19   | -0,09<br>3,88<br>0,29   | 0,28<br>17,40<br>0,20  |                      |                      |
| 10        | 0,39<br>0,06<br>0,34    | 0,98<br>0,13<br>0,27    | -0,01<br>0,06<br>0,18  | 0,31<br>0,13<br>0,17   | -0,01<br>0,05<br>0,09   | 0,13<br>0,15<br>0,06   |                      |                      |
| 20        | 0,25<br>0,06<br>0,33    | 0,60<br>0,10<br>0,23    | 0,00<br>0,05<br>0,08   | 0,21<br>0,13<br>0,09   | -0,01<br>0,04<br>0,03   | 0,10<br>0,15<br>0,02   |                      |                      |
| 50        | 0,08<br>0,46<br>0,42    | 0,56<br>1,08<br>0,29    | 0,01<br>1,28<br>0,19   | 0,13<br>2,33<br>0,22   | -0,01<br>2,11<br>0,22   | 0,07<br>3,11<br>0,23   |                      |                      |
| 100       | -0,22<br>0,07<br>0,56   | 0,44<br>0,72<br>0,33    | -0,03<br>2,71<br>0,40  | 0,12<br>2,24<br>0,28   | -0,02<br>3,91<br>0,50   | 0,06<br>3,41<br>0,36   | 0,00<br>3,20<br>0,46 | 0,04<br>3,11<br>0,32 |

| $k=0,01$ | 0,2                     | 0,5                     | 1                       | 2                      | 5                       | 10                     | 20                   | 50                   |
|----------|-------------------------|-------------------------|-------------------------|------------------------|-------------------------|------------------------|----------------------|----------------------|
| 0,5      | 1,45<br>1044,51<br>6,72 | 1,50<br>2071,65<br>5,08 |                         |                        |                         |                        |                      |                      |
| 1        | 2,04<br>663,78<br>5,35  | 1,60<br>898,56<br>4,53  | 0,25<br>552,69<br>4,50  | 0,60<br>877,79<br>3,80 |                         |                        |                      |                      |
| 2        | 1,00<br>163,60<br>4,82  | 1,15<br>339,33<br>4,62  | -0,12<br>116,65<br>5,33 | 0,55<br>276,51<br>5,57 | -0,45<br>154,34<br>8,96 | 0,28<br>376,03<br>8,21 |                      |                      |
| 5        | 1,66<br>20,02<br>0,78   | 1,70<br>48,50<br>1,58   | 0,05<br>15,94<br>0,56   | 0,60<br>43,57<br>0,24  | -0,16<br>37,74<br>0,41  | 0,40<br>78,29<br>0,53  |                      |                      |
| 10       | 1,41<br>2,55<br>0,35    | 1,72<br>8,51<br>0,29    | 0,10<br>2,77<br>0,36    | 0,55<br>9,50<br>0,25   | -0,02<br>4,08<br>0,19   | 0,28<br>10,99<br>0,13  |                      |                      |
| 20       | 0,88<br>1,62<br>0,44    | 1,30<br>3,69<br>0,29    | 0,05<br>1,71<br>0,24    | 0,39<br>4,59<br>0,21   | 0,00<br>1,70<br>0,10    | 0,20<br>4,56<br>0,12   |                      |                      |
| 50       | 0,28<br>2,31<br>0,52    | 0,89<br>3,38<br>0,39    | -0,10<br>4,36<br>0,48   | 0,30<br>5,27<br>0,35   | -0,06<br>6,75<br>0,47   | 0,14<br>6,63<br>0,38   |                      |                      |
| 100      | -0,14<br>1,17<br>0,62   | 0,67<br>1,69<br>0,42    | -0,12<br>4,16<br>0,43   | 0,23<br>3,33<br>0,31   | -0,04<br>6,27<br>0,62   | 0,11<br>4,89<br>0,43   | 0,00<br>5,75<br>0,58 | 0,08<br>4,19<br>0,39 |

R=0.8

$\tau_1 \times \text{frame rate}$

| $k=0,001$ | 0,2                     | 0,5                     | 1                       | 2                       | 5                     | 10                   | 20                   | 50                   |
|-----------|-------------------------|-------------------------|-------------------------|-------------------------|-----------------------|----------------------|----------------------|----------------------|
| 0,5       | 0,36<br>2056,94<br>1,80 | 0,48<br>5148,88<br>1,22 |                         |                         |                       |                      |                      |                      |
| 1         | 0,27<br>136,44<br>0,69  | 0,53<br>451,27<br>0,55  | -0,10<br>563,76<br>1,34 | 0,33<br>1795,18<br>0,93 |                       |                      |                      |                      |
| 2         | 0,26<br>0,35<br>0,39    | 0,63<br>1,06<br>0,15    | -0,12<br>1,12<br>0,35   | 0,31<br>4,80<br>0,21    | -0,27<br>3,67<br>1,22 | 0,25<br>9,65<br>1,04 |                      |                      |
| 5         | -0,07<br>0,00<br>0,23   | 0,34<br>0,06<br>0,17    | -0,01<br>0,01<br>0,05   | 0,11<br>0,08<br>0,04    | -0,01<br>0,02<br>0,14 | 0,06<br>0,16<br>0,09 |                      |                      |
| 10        | -0,05<br>0,00<br>0,15   | 0,23<br>0,03<br>0,13    | 0,01<br>0,01<br>0,01    | 0,05<br>0,04<br>0,01    | 0,00<br>0,05<br>0,03  | 0,03<br>0,02<br>0,02 | 0,08<br>0,22<br>0,89 | 0,09<br>0,34<br>0,66 |
| 20        | 0,00<br>0,00<br>0,09    | 0,15<br>0,03<br>0,07    | 0,00<br>0,01<br>0,01    | 0,04<br>0,04<br>0,01    | 0,00<br>0,01<br>0,01  | 0,02<br>0,05<br>0,02 | 0,01<br>0,06<br>0,10 | 0,02<br>0,15<br>0,08 |
| 50        | -0,14<br>-0,10<br>0,17  | 0,15<br>0,07<br>0,11    | 0,00<br>0,04<br>0,03    | 0,03<br>0,09<br>0,02    | 0,00<br>0,14<br>0,03  | 0,01<br>0,19<br>0,03 | 0,00<br>0,28<br>0,06 | 0,01<br>0,69<br>0,09 |
| 100       | -0,31<br>-0,43<br>0,44  | 0,14<br>0,08<br>0,14    | 0,00<br>0,68<br>0,19    | 0,03<br>1,00<br>0,19    | 0,00<br>1,14<br>0,24  | 0,01<br>1,26<br>0,20 | 0,00<br>1,65<br>0,33 | 0,01<br>1,82<br>0,29 |

| $k=0,002$ | 0,2                      | 0,5                      | 1                       | 2                       | 5                        | 10                      | 20                     | 50                     |
|-----------|--------------------------|--------------------------|-------------------------|-------------------------|--------------------------|-------------------------|------------------------|------------------------|
| 0,5       | 0,54<br>17559,43<br>1,85 | 0,41<br>24466,47<br>0,82 |                         |                         |                          |                         |                        |                        |
| 1         | 0,69<br>4672,35<br>1,58  | 1,01<br>5829,63<br>1,55  | 0,18<br>1257,40<br>2,57 | 0,37<br>3037,41<br>1,57 |                          |                         |                        |                        |
| 2         | 0,40<br>135,82<br>1,47   | 1,18<br>699,38<br>1,77   | -0,06<br>263,65<br>0,47 | 0,35<br>728,40<br>0,37  | -0,15<br>1363,95<br>0,99 | 0,30<br>1762,23<br>0,66 |                        |                        |
| 5         | 0,04<br>0,03<br>0,29     | 0,43<br>0,10<br>0,20     | -0,02<br>0,08<br>0,22   | 0,21<br>0,16<br>0,31    | -0,03<br>0,11<br>0,23    | 0,13<br>0,23<br>0,19    | -0,12<br>22,31<br>0,89 | 0,18<br>77,30<br>0,64  |
| 10        | 0,01<br>0,02<br>0,24     | 0,38<br>0,07<br>0,17     | -0,01<br>0,02<br>0,03   | 0,11<br>0,08<br>0,02    | 0,05<br>0,09<br>0,04     | -0,01<br>0,06<br>0,13   | 0,04<br>0,16<br>0,09   | -0,16<br>26,74<br>1,31 |
| 20        | 0,00<br>0,01<br>0,17     | 0,27<br>0,06<br>0,13     | 0,01<br>0,02<br>0,02    | 0,07<br>0,07<br>0,02    | 0,00<br>0,08<br>0,02     | 0,03<br>0,13<br>0,03    | -0,02<br>0,95<br>0,27  | 0,04<br>3,56<br>2,23   |
| 50        | 0,03<br>0,58<br>0,22     | 0,22<br>1,67<br>0,20     | -0,01<br>0,56<br>0,11   | 0,06<br>1,87<br>0,16    | 0,00<br>0,85<br>0,12     | 0,02<br>2,11<br>0,18    | 0,00<br>3,17<br>0,25   | -0,01<br>3,06<br>0,32  |
| 100       | -0,05<br>2,87<br>0,48    | 0,20<br>3,43<br>0,40     | -0,01<br>3,16<br>0,44   | 0,05<br>3,20<br>0,34    | -0,01<br>3,12<br>0,43    | 0,02<br>3,39<br>0,37    | 0,00<br>3,63<br>0,51   | 0,01<br>3,28<br>0,37   |

| $k=0,005$ | 0,2                    | 0,5                     | 1                       | 2                       | 5                       | 10                     | 20                     | 50                    |
|-----------|------------------------|-------------------------|-------------------------|-------------------------|-------------------------|------------------------|------------------------|-----------------------|
| 0,5       | 0,93<br>994,08<br>4,91 | 1,03<br>1602,08<br>4,11 |                         |                         |                         |                        |                        |                       |
| 1         | 1,10<br>584,37<br>3,56 | 0,99<br>1028,46<br>3,61 | 0,13<br>629,30<br>3,85  | 0,41<br>1219,55<br>3,33 |                         |                        |                        |                       |
| 2         | 0,96<br>167,67<br>1,27 | 1,10<br>338,44<br>1,70  | -0,07<br>204,26<br>1,15 | 0,45<br>348,65<br>1,84  | -0,42<br>120,60<br>5,93 | 0,27<br>235,78<br>5,97 |                        |                       |
| 5         | 0,80<br>4,71<br>0,37   | 1,09<br>17,53<br>0,23   | -0,05<br>4,13<br>0,31   | 0,41<br>19,10<br>0,18   | -0,14<br>19,95<br>0,26  | 0,24<br>45,54<br>0,22  | -0,25<br>45,47<br>1,17 | 0,28<br>86,05<br>1,14 |
| 10        | 0,35<br>0,11<br>0,32   | 0,79<br>0,19<br>0,24    | 0,01<br>0,13<br>0,13    | 0,26<br>0,26<br>0,10    | 0,00<br>0,95<br>0,15    | 0,14<br>5,34<br>0,11   | -0,04<br>5,35<br>0,40  | 0,12<br>14,14<br>0,30 |
| 20        | 0,21<br>0,25<br>0,33   | 0,61<br>1,03<br>0,24    | 0,01<br>0,42<br>0,09    | 0,19<br>1,68<br>0,12    | 0,00<br>0,47<br>0,06    | 0,08<br>2,22<br>0,08   | -0,02<br>1,30<br>0,17  | 0,08<br>3,92<br>0,17  |
| 50        | -0,10<br>0,90<br>0,49  | 0,49<br>1,77<br>0,32    | -0,02<br>3,75<br>0,44   | 0,14<br>4,06<br>0,35    | -0,01<br>4,61<br>0,44   | 0,06<br>5,29<br>0,41   | -0,02<br>4,85<br>0,46  | 0,04<br>6,11<br>0,46  |
| 100       | -0,32<br>0,42<br>0,52  | 0,38<br>1,20<br>0,34    | -0,05<br>3,63<br>0,54   | 0,12<br>3,49<br>0,41    | -0,03<br>4,04<br>0,55   | 0,05<br>3,13<br>0,35   | -0,02<br>4,66<br>0,64  | 0,04<br>4,15<br>0,46  |

| $k=0,01$ | 0,2                     | 0,5                     | 1                      | 2                      | 5                        | 10                      | 20                     | 50                     |
|----------|-------------------------|-------------------------|------------------------|------------------------|--------------------------|-------------------------|------------------------|------------------------|
| 0,5      | 1,78<br>1139,08<br>9,26 | 1,62<br>2342,40<br>7,04 |                        |                        |                          |                         |                        |                        |
| 1        | 1,90<br>615,71<br>6,89  | 1,54<br>958,34<br>5,95  | 0,16<br>622,06<br>5,23 | 0,56<br>992,20<br>4,96 |                          |                         |                        |                        |
| 2        | 1,32<br>230,63<br>4,30  | 1,48<br>399,98<br>5,29  | 0,25<br>185,84<br>4,49 | 0,57<br>287,72<br>4,08 | -0,50<br>133,84<br>12,19 | 0,25<br>264,37<br>10,99 |                        |                        |
| 5        | 1,23<br>29,04<br>0,97   | 1,43<br>57,40<br>2,48   | -0,06<br>36,64<br>0,59 | 0,55<br>75,87<br>1,62  | -0,29<br>54,10<br>0,82   | 0,36<br>98,41<br>1,97   | -0,35<br>80,72<br>4,03 | 0,28<br>119,06<br>4,56 |
| 10       | 0,97<br>5,53<br>0,46    | 1,41<br>12,61<br>0,27   | -0,11<br>4,88<br>0,32  | 0,39<br>16,30<br>0,22  | -0,08<br>15,07<br>0,24   | 0,26<br>27,99<br>0,21   | -0,20<br>29,70<br>0,68 | 0,25<br>40,29<br>0,52  |
| 20       | 0,49<br>2,00<br>0,52    | 1,03<br>5,51<br>0,36    | -0,02<br>3,61<br>0,26  | 0,33<br>7,42<br>0,23   | -0,02<br>9,88<br>0,35    | 0,17<br>14,57<br>0,38   | -0,08<br>12,41<br>0,59 | 0,14<br>17,07<br>0,39  |
| 50       | 0,10<br>3,28<br>0,65    | 0,74<br>3,88<br>0,38    | -0,11<br>7,89<br>0,58  | 0,23<br>6,36<br>0,42   | -0,08<br>10,55<br>0,75   | 0,12<br>10,35<br>0,61   | -0,05<br>11,97<br>0,93 | 0,09<br>8,24<br>0,54   |
| 100      | -0,14<br>2,19<br>0,62   | 0,65<br>2,75<br>0,46    | -0,12<br>6,10<br>0,62  | 0,23<br>5,09<br>0,51   | -0,08<br>6,57<br>0,71    | 0,11<br>4,99<br>0,46    | -0,07<br>7,49<br>0,85  | 0,08<br>6,08<br>0,54   |

R=0.9

$\tau_1 \times \text{frame rate}$

| $k=0,001$ | 0,2                     | 0,5                     | 1                       | 2                       | 5                     | 10                    | 20                    | 50                    |                        |                      |                        |                      |                        |                      |                         |                      |
|-----------|-------------------------|-------------------------|-------------------------|-------------------------|-----------------------|-----------------------|-----------------------|-----------------------|------------------------|----------------------|------------------------|----------------------|------------------------|----------------------|-------------------------|----------------------|
| 0,5       | 0,28<br>1395,24<br>2,75 | 0,39<br>3403,93<br>2,03 |                         |                         |                       |                       |                       |                       |                        |                      |                        |                      |                        |                      |                         |                      |
| 1         | 0,15<br>718,77<br>1,00  | 0,43<br>2026,73<br>1,08 | -0,13<br>886,37<br>1,97 | 0,25<br>2121,44<br>1,82 |                       |                       |                       |                       |                        |                      |                        |                      |                        |                      |                         |                      |
| 2         | 0,13<br>2,04<br>0,42    | 0,45<br>8,63<br>0,19    | -0,23<br>10,50<br>0,70  | 0,26<br>40,20<br>0,56   | -0,37<br>3,37<br>4,18 | 0,26<br>13,43<br>2,76 |                       |                       |                        |                      |                        |                      |                        |                      |                         |                      |
| 5         | 0,00<br>0,04<br>0,17    | 0,33<br>0,12<br>0,15    | -0,03<br>0,01<br>0,10   | 0,10<br>0,14<br>0,09    | -0,03<br>0,06<br>0,33 | 0,07<br>0,20<br>0,30  | -0,09<br>1,24<br>1,64 | 0,12<br>1,44          |                        |                      |                        |                      |                        |                      |                         |                      |
| 10        | 0,00<br>0,02<br>0,09    | 0,18<br>0,06<br>0,08    | -0,01<br>0,01<br>0,03   | 0,05<br>0,08<br>0,02    | -0,01<br>0,01<br>0,07 | 0,03<br>0,16<br>0,05  | -0,01<br>0,28<br>2,76 | 0,14<br>2,06          |                        |                      |                        |                      |                        |                      |                         |                      |
| 20        | 0,01<br>0,02<br>0,08    | 0,14<br>0,06<br>0,06    | -0,01<br>0,01<br>0,01   | 0,03<br>0,08<br>0,01    | 0,00<br>0,02<br>0,02  | 0,01<br>0,05<br>0,04  | 0,00<br>0,12<br>0,25  | -0,21<br>0,12<br>3,86 | 0,18<br>2,33           |                      |                        |                      |                        |                      |                         |                      |
| 50        | -0,03<br>0,08<br>0,14   | 0,15<br>0,44<br>0,12    | 0,00<br>0,46<br>0,11    | 0,03<br>1,15<br>0,15    | 0,00<br>0,78<br>0,14  | 0,01<br>2,01<br>0,20  | 0,00<br>1,10<br>0,24  | 0,01<br>1,50<br>0,58  | -0,03<br>-0,44<br>5,10 | 0,03<br>0,20<br>2,25 |                        |                      |                        |                      |                         |                      |
| 100       | -0,15<br>-0,37<br>0,28  | 0,12<br>0,21<br>0,13    | 0,00<br>1,70<br>0,38    | 0,02<br>1,76<br>0,32    | 0,00<br>2,11<br>0,42  | 0,01<br>2,04<br>0,32  | 0,00<br>3,29<br>0,59  | 0,01<br>2,82<br>0,44  | 0,00<br>0,62<br>0,22   | 0,01<br>0,89<br>0,17 | -0,04<br>-0,60<br>0,46 | 0,04<br>0,10<br>0,72 | -0,21<br>-0,71<br>4,53 | 0,15<br>0,04<br>2,08 | -0,33<br>-0,46<br>13,19 | 0,05<br>0,07<br>3,98 |

  

| $k=0,002$ | 0,2                      | 0,5                      | 1                      | 2                       | 5                        | 10                      | 20                      | 50                     |                        |                        |                        |                       |                       |                      |                        |                      |
|-----------|--------------------------|--------------------------|------------------------|-------------------------|--------------------------|-------------------------|-------------------------|------------------------|------------------------|------------------------|------------------------|-----------------------|-----------------------|----------------------|------------------------|----------------------|
| 0,5       | 0,35<br>22210,97<br>2,36 | 0,45<br>27449,74<br>1,96 |                        |                         |                          |                         |                         |                        |                        |                        |                        |                       |                       |                      |                        |                      |
| 1         | 0,36<br>7606,52<br>1,95  | 1,38<br>8382,10<br>2,01  | 0,13<br>597,10<br>3,57 | 0,22<br>1595,87<br>2,40 |                          |                         |                         |                        |                        |                        |                        |                       |                       |                      |                        |                      |
| 2         | 0,37<br>636,25<br>0,89   | 0,93<br>1522,86<br>0,95  | 0,08<br>361,34<br>1,43 | 0,28<br>1446,83<br>0,97 | -0,09<br>1348,75<br>1,79 | 0,22<br>1739,48<br>1,21 |                         |                        |                        |                        |                        |                       |                       |                      |                        |                      |
| 5         | 0,16<br>0,26<br>0,75     | 0,50<br>0,64<br>1,04     | -0,07<br>1,77<br>1,29  | 0,20<br>14,55<br>1,72   | -0,06<br>12,49<br>0,61   | 0,13<br>50,58<br>0,58   | -0,18<br>124,11<br>2,44 | 0,19<br>243,53<br>1,73 |                        |                        |                        |                       |                       |                      |                        |                      |
| 10        | 0,01<br>0,05<br>0,21     | 0,39<br>0,15<br>0,16     | -0,02<br>0,07<br>0,81  | 0,11<br>0,19<br>1,46    | 0,00<br>0,09<br>0,12     | 0,05<br>0,23<br>0,30    | -0,01<br>1,73<br>0,33   | 0,04<br>11,27<br>0,30  | -0,16<br>90,98<br>2,89 | 0,19<br>122,17<br>2,16 |                        |                       |                       |                      |                        |                      |
| 20        | -0,07<br>0,03<br>0,17    | 0,24<br>0,16<br>0,14     | 0,00<br>0,08<br>1,20   | 0,07<br>0,20<br>2,04    | 0,00<br>0,37<br>0,05     | 0,03<br>2,92<br>0,10    | -0,01<br>0,42<br>0,11   | 0,03<br>2,62<br>0,12   | -0,04<br>9,64<br>1,02  | 0,06<br>13,89<br>0,92  | -0,18<br>20,91<br>3,40 | 0,18<br>30,41<br>2,23 |                       |                      |                        |                      |
| 50        | -0,01<br>4,48<br>0,52    | 0,22<br>6,12<br>0,49     | 0,00<br>5,05<br>1,03   | 0,05<br>6,47<br>1,28    | -0,01<br>5,33<br>0,48    | 0,02<br>7,24<br>0,55    | 0,00<br>6,80<br>0,61    | 0,01<br>8,81<br>0,67   | -0,02<br>7,22<br>0,82  | 0,02<br>7,56<br>0,60   | -0,04<br>7,00<br>2,25  | 0,12<br>6,84<br>1,56  | -0,23<br>3,59<br>6,89 | 0,19<br>6,23<br>3,58 |                        |                      |
| 100       | -0,06<br>7,49<br>0,93    | 0,20<br>6,59<br>0,68     | -0,02<br>7,62<br>1,78  | 0,05<br>6,24<br>1,50    | -0,01<br>9,36<br>1,10    | 0,02<br>6,44<br>0,69    | -0,01<br>9,36<br>0,92   | 0,02<br>6,44<br>0,68   | -0,02<br>5,68<br>0,90  | 0,02<br>4,88<br>0,58   | -0,04<br>3,45<br>1,97  | 0,11<br>3,36<br>1,57  | -0,22<br>2,02<br>6,28 | 0,16<br>3,82<br>3,43 | -0,44<br>0,30<br>10,37 | 0,13<br>1,41<br>2,93 |

  

| $k=0,005$ | 0,2                    | 0,5                     | 1                       | 2                       | 5                       | 10                      | 20                     | 50                    |                       |                       |                       |                       |                       |                      |                        |                      |
|-----------|------------------------|-------------------------|-------------------------|-------------------------|-------------------------|-------------------------|------------------------|-----------------------|-----------------------|-----------------------|-----------------------|-----------------------|-----------------------|----------------------|------------------------|----------------------|
| 0,5       | 0,84<br>924,18<br>8,02 | 1,17<br>1887,64<br>7,72 |                         |                         |                         |                         |                        |                       |                       |                       |                       |                       |                       |                      |                        |                      |
| 1         | 0,72<br>917,64<br>5,90 | 1,07<br>1399,24<br>6,90 | 0,08<br>621,97<br>5,74  | 0,42<br>1107,71<br>5,36 |                         |                         |                        |                       |                       |                       |                       |                       |                       |                      |                        |                      |
| 2         | 0,84<br>291,20<br>3,23 | 1,00<br>508,15<br>4,39  | -0,02<br>341,68<br>2,89 | 0,39<br>503,04<br>3,51  | -0,51<br>83,94<br>14,49 | 0,22<br>221,48<br>12,18 |                        |                       |                       |                       |                       |                       |                       |                      |                        |                      |
| 5         | 0,13<br>7,02<br>0,43   | 0,72<br>21,06<br>0,23   | -0,13<br>24,94<br>0,25  | 0,33<br>55,25<br>0,17   | -0,30<br>49,33<br>1,44  | 0,27<br>86,76<br>2,07   | -0,39<br>35,14<br>5,40 | 0,27<br>74,84<br>4,61 |                       |                       |                       |                       |                       |                      |                        |                      |
| 10        | 0,20<br>3,05<br>0,40   | 0,68<br>8,39<br>0,28    | -0,08<br>3,49<br>0,17   | 0,26<br>11,96<br>0,20   | -0,12<br>9,91<br>0,53   | 0,18<br>22,07<br>0,43   | -0,15<br>26,28<br>1,62 | 0,18<br>37,50<br>1,40 | -0,44<br>4,24<br>8,52 | 0,24<br>10,82<br>5,47 |                       |                       |                       |                      |                        |                      |
| 20        | 0,00<br>1,69<br>0,38   | 0,48<br>4,05<br>0,30    | -0,04<br>4,70<br>0,26   | 0,16<br>10,15<br>0,41   | -0,03<br>7,32<br>0,40   | 0,08<br>12,83<br>0,40   | -0,05<br>9,81<br>0,74  | 0,07<br>15,64<br>0,55 | -0,18<br>7,59<br>2,67 | 0,18<br>10,75<br>2,12 | -0,40<br>0,92<br>8,68 | 0,21<br>2,44<br>5,35  |                       |                      |                        |                      |
| 50        | -0,08<br>4,05<br>0,74  | 0,47<br>4,94<br>0,56    | -0,08<br>7,06<br>0,69   | 0,13<br>7,13<br>0,57    | -0,03<br>10,39<br>0,97  | 0,06<br>8,34<br>0,68    | -0,02<br>13,87<br>1,29 | 0,04<br>11,00<br>0,81 | -0,09<br>6,90<br>1,86 | 0,13<br>6,87<br>1,20  | -0,29<br>6,87<br>5,29 | 0,21<br>1,60<br>3,58  | -0,26<br>3,71<br>8,44 | 0,20<br>5,76<br>4,60 |                        |                      |
| 100       | -0,18<br>1,95<br>0,61  | 0,41<br>2,69<br>0,44    | -0,08<br>6,23<br>0,87   | 0,11<br>4,89<br>0,57    | -0,04<br>7,08<br>0,92   | 0,06<br>5,41<br>0,56    | -0,05<br>6,76<br>1,00  | 0,07<br>5,19<br>0,66  | -0,11<br>3,00<br>1,75 | 0,11<br>3,32<br>1,24  | -0,18<br>7,41<br>3,54 | 0,17<br>10,13<br>1,97 | -0,21<br>2,04<br>8,89 | 0,17<br>3,10<br>5,14 | -0,52<br>0,70<br>11,64 | 0,16<br>1,72<br>4,47 |

  

| $k=0,01$ | 0,2                     | 0,5                      | 1                       | 2                       | 5                        | 10                      | 20                      | 50                      |                         |                        |                        |                      |                         |                      |                         |                       |
|----------|-------------------------|--------------------------|-------------------------|-------------------------|--------------------------|-------------------------|-------------------------|-------------------------|-------------------------|------------------------|------------------------|----------------------|-------------------------|----------------------|-------------------------|-----------------------|
| 0,5      | 1,08<br>723,18<br>12,29 | 1,36<br>1300,68<br>10,97 |                         |                         |                          |                         |                         |                         |                         |                        |                        |                      |                         |                      |                         |                       |
| 1        | 1,63<br>565,04<br>13,58 | 1,65<br>966,80<br>13,58  | 0,28<br>758,98<br>10,03 | 0,57<br>1319,41<br>9,12 |                          |                         |                         |                         |                         |                        |                        |                      |                         |                      |                         |                       |
| 2        | 1,49<br>220,93<br>9,73  | 1,59<br>416,44<br>12,40  | 0,22<br>301,22<br>8,69  | 0,63<br>464,42<br>9,60  | -0,52<br>135,22<br>27,83 | 0,23<br>276,29<br>20,23 |                         |                         |                         |                        |                        |                      |                         |                      |                         |                       |
| 5        | 0,37<br>43,32<br>3,53   | 1,04<br>85,39<br>8,91    | -0,12<br>82,94<br>2,64  | 0,44<br>124,65<br>5,85  | -0,39<br>83,74<br>6,23   | 0,28<br>124,24<br>9,63  | -0,52<br>64,85<br>13,15 | 0,27<br>113,49<br>11,33 |                         |                        |                        |                      |                         |                      |                         |                       |
| 10       | 0,21<br>24,94<br>1,07   | 0,84<br>36,02<br>3,01    | -0,22<br>29,35<br>0,68  | 0,34<br>45,97<br>2,14   | -0,25<br>41,95<br>1,64   | 0,24<br>61,88<br>3,00   | -0,31<br>40,71<br>3,28  | 0,23<br>53,31<br>4,66   | -0,46<br>16,32<br>14,26 | 0,23<br>28,59<br>10,35 |                        |                      |                         |                      |                         |                       |
| 20       | 0,14<br>10,65<br>0,79   | 0,82<br>15,71<br>0,66    | -0,13<br>21,62<br>0,84  | 0,30<br>25,06<br>0,70   | -0,14<br>23,70<br>1,02   | 0,18<br>23,53<br>0,74   | -0,15<br>26,97<br>1,65  | 0,18<br>25,96<br>1,43   | -0,37<br>12,18<br>6,76  | 0,24<br>14,79<br>5,39  | -0,40<br>2,82<br>14,92 | 0,20<br>5,41<br>9,90 |                         |                      |                         |                       |
| 50       | -0,17<br>7,23<br>0,89   | 0,65<br>7,97<br>0,59     | -0,19<br>13,68<br>1,08  | 0,23<br>10,89<br>1,05   | -0,14<br>18,52<br>1,46   | 0,16<br>15,43<br>0,95   | -0,15<br>16,46<br>2,00  | 0,16<br>12,37<br>1,46   | -0,34<br>7,47<br>4,85   | 0,22<br>8,03<br>3,55   | -0,42<br>1,54<br>11,18 | 0,21<br>3,16<br>8,81 | -0,44<br>0,31<br>16,72  | 0,17<br>1,57<br>9,91 |                         |                       |
| 100      | -0,14<br>3,68<br>1,04   | 0,55<br>4,99<br>2,50     | -0,19<br>9,07<br>1,05   | 0,26<br>8,11<br>0,80    | -0,16<br>10,09<br>1,65   | 0,18<br>7,43<br>3,25    | -0,19<br>9,52<br>2,36   | 0,16<br>7,39<br>2,90    | -0,31<br>3,44<br>5,74   | 0,22<br>4,10<br>5,14   | -0,39<br>0,80<br>10,44 | 0,20<br>1,83<br>8,01 | -0,43<br>-0,29<br>14,48 | 0,16<br>0,72<br>9,84 | -0,55<br>-0,17<br>25,72 | 0,13<br>0,55<br>13,65 |
