# Supplementary material for: FRAP to Characterize Molecular Diffusion and Interaction in Various Membrane Environments
Source: PubMed Central journal article supplement (PMC4936743; doi:10.1371/journal.pone.0158457), 2016-07-07
Supplement: pone.0158457.s008.pdf [file pone.0158457.s008.pdf]

**S3 Table.** Numerical values of the *in silico* studies of FRAPP experiments with two diffusing species (see the legend of S5 Fig for details). Each cell displays, for a given pair of  $(\tau_1, \tau_2)$  values, (i) the normalized differences between the averages and the theoretical values (left):  $(\langle \bar{\tau}_1 \rangle - \tau_1) / \tau_1$  (first line),  $(\langle \bar{\tau}_2 \rangle - \tau_2) / \tau_2$  (second line),  $|\langle \bar{R} \rangle - R| / R + |(1 - \langle \bar{R} \rangle) - (1 - R)| / (1 - R)$  (third line), and (ii) the associated normalized standard deviations (right):  $\sigma(\bar{\tau}_1) / \tau_1$  (first line),  $\sigma(\bar{\tau}_2) / \tau_2$  (second line) and  $\sigma(\bar{R}) / R$  (third line). The solvable cases (in green) were arbitrarily defined as the cases where  $\langle \bar{\tau}_1 \rangle$ ,  $\langle \bar{\tau}_2 \rangle$  and  $\langle \bar{R} \rangle$  all differ by less than 20% from the theoretical values, and all normalized standard deviations are lower than 20%.

R=0.1

$\tau_1 \times \text{frame rate}$

| $k=0,001$ | 0,2                      | 0,5                     | 1                       | 2                       | 5                      | 10                     | 20                   | 50                    |
|-----------|--------------------------|-------------------------|-------------------------|-------------------------|------------------------|------------------------|----------------------|-----------------------|
| 0,5       | 1,46<br>2815,38<br>11,22 | 0,26<br>3278,00<br>3,15 |                         |                         |                        |                        |                      |                       |
| 1         | 3,90<br>2494,67<br>10,22 | 0,34<br>2593,08<br>2,06 | 0,81<br>2050,66<br>9,15 | 0,21<br>2415,58<br>1,81 |                        |                        |                      |                       |
| 2         | 7,70<br>440,22<br>8,45   | 1,50<br>642,41<br>3,04  | 0,42<br>67,66<br>3,13   | 0,47<br>303,14<br>2,00  | 0,13<br>143,65<br>2,46 | 0,30<br>416,84<br>2,02 |                      |                       |
| 5         | 18,39<br>76,06<br>7,26   | 4,48<br>152,50<br>3,27  | 0,02<br>0,00<br>0,68    | 0,20<br>0,00<br>0,71    | 0,01<br>0,00<br>0,03   | 0,07<br>0,00<br>0,02   | 0,09<br>0,00<br>0,12 | 0,09<br>0,01<br>0,09  |
| 10        | 44,11<br>76,82<br>7,72   | 7,00<br>101,64<br>2,91  | 0,38<br>0,00<br>0,38    | 1,50<br>0,00<br>0,57    | 0,00<br>0,00<br>0,02   | 0,04<br>0,00<br>0,02   | 0,04<br>0,00<br>0,03 | 0,08<br>0,01<br>0,26  |
| 20        | 64,68<br>0,22<br>2,03    | 18,91<br>1,10<br>1,27   | 10,82<br>0,00<br>1,18   | 9,42<br>0,00<br>0,97    | 0,00<br>0,00<br>0,02   | 0,03<br>0,00<br>0,01   | 0,00<br>0,00<br>0,00 | 0,54<br>-0,02<br>1,43 |
| 50        | 116,25<br>0,08<br>1,43   | 51,28<br>0,20<br>0,89   | -0,01<br>0,00<br>0,14   | 0,07<br>0,00<br>0,12    | 0,00<br>0,00<br>0,01   | 0,02<br>0,00<br>0,01   | 0,01<br>0,00<br>0,06 | 0,04<br>0,01<br>0,04  |
| 100       | 188,18<br>0,09<br>1,25   | 67,60<br>0,18<br>0,89   | -3,65<br>-0,01<br>0,18  | 14,55<br>0,03<br>0,29   | 0,00<br>0,01<br>0,01   | 0,01<br>0,00<br>0,01   | 0,00<br>0,01<br>0,00 | 0,03<br>0,04<br>0,21  |

| $k=0,002$ | 0,2                      | 0,5                     | 1                        | 2                       | 5                      | 10                     | 20                   | 50                    |
|-----------|--------------------------|-------------------------|--------------------------|-------------------------|------------------------|------------------------|----------------------|-----------------------|
| 0,5       | 1,59<br>2856,18<br>10,20 | 0,28<br>3198,58<br>3,00 |                          |                         |                        |                        |                      |                       |
| 1         | 3,86<br>2040,31<br>10,48 | 0,42<br>2101,99<br>2,33 | 0,85<br>1880,25<br>10,09 | 0,24<br>1710,06<br>2,12 |                        |                        |                      |                       |
| 2         | 7,82<br>325,45<br>10,02  | 1,66<br>573,13<br>3,69  | 1,38<br>350,32<br>5,32   | 0,87<br>663,52<br>2,35  | 0,47<br>707,57<br>6,45 | 0,32<br>884,69<br>2,23 |                      |                       |
| 5         | 18,84<br>75,03<br>7,91   | 4,68<br>142,90<br>3,29  | 0,33<br>5,10<br>1,19     | 0,88<br>37,41<br>1,22   | 0,03<br>0,00<br>0,09   | 0,14<br>0,01<br>0,17   | 0,01<br>0,02<br>0,34 | 0,17<br>0,02<br>0,45  |
| 10        | 42,67<br>44,58<br>7,97   | 7,42<br>64,94<br>4,14   | 0,80<br>0,77<br>0,92     | 2,04<br>7,58<br>0,90    | 0,12<br>0,00<br>0,12   | 0,58<br>0,00<br>0,36   | 0,04<br>0,00<br>0,11 | 0,19<br>0,00<br>0,46  |
| 20        | 66,66<br>1,54<br>2,77    | 20,02<br>4,00<br>2,46   | 5,18<br>0,00<br>0,85     | 6,31<br>0,00<br>0,66    | 0,00<br>0,00<br>0,03   | 0,05<br>0,00<br>0,03   | 0,01<br>0,00<br>0,01 | 0,03<br>-0,01<br>0,78 |
| 50        | 136,52<br>0,27<br>1,75   | 46,19<br>0,58<br>1,35   | 0,35<br>0,00<br>0,41     | 3,21<br>0,00<br>0,56    | 0,00<br>0,01<br>0,03   | 0,06<br>0,00<br>0,10   | 0,02<br>0,01<br>0,50 | 0,01<br>0,02<br>0,01  |
| 100       | 197,49<br>0,31<br>1,83   | 71,64<br>0,52<br>1,58   | -1,42<br>0,00<br>0,34    | 18,43<br>0,03<br>0,45   | 0,00<br>0,01<br>0,03   | 0,00<br>0,02<br>0,02   | 0,00<br>0,03<br>0,06 | 0,02<br>0,05<br>0,10  |

| $k=0,005$ | 0,2                     | 0,5                     | 1                        | 2                       | 5                      | 10                     | 20                    | 50                    |
|-----------|-------------------------|-------------------------|--------------------------|-------------------------|------------------------|------------------------|-----------------------|-----------------------|
| 0,5       | 1,55<br>1585,54<br>9,26 | 0,45<br>2277,74<br>3,58 |                          |                         |                        |                        |                       |                       |
| 1         | 3,75<br>763,69<br>12,80 | 0,63<br>1111,10<br>6,60 | 0,85<br>1245,97<br>11,31 | 0,25<br>1319,34<br>4,83 |                        |                        |                       |                       |
| 2         | 7,61<br>267,73<br>13,24 | 1,67<br>479,79<br>6,62  | 2,12<br>450,07<br>9,02   | 0,76<br>525,41<br>3,86  | 0,65<br>561,40<br>9,44 | 0,36<br>680,20<br>3,74 |                       |                       |
| 5         | 19,60<br>118,80<br>9,46 | 4,27<br>147,43<br>5,04  | 3,62<br>37,63<br>4,55    | 2,38<br>84,34<br>2,98   | 0,37<br>8,60<br>1,28   | 0,61<br>35,32<br>1,34  | 0,17<br>23,81<br>2,34 | 0,39<br>70,29<br>1,88 |
| 10        | 42,57<br>39,52<br>9,11  | 8,66<br>49,16<br>4,66   | 6,58<br>16,57<br>3,40    | 4,71<br>33,33<br>2,43   | 0,29<br>0,00<br>0,39   | 0,74<br>0,01<br>0,84   | 0,06<br>0,00<br>0,11  | 0,26<br>20,10<br>0,22 |
| 20        | 75,32<br>6,44<br>3,47   | 17,06<br>10,13<br>2,82  | 9,74<br>0,85<br>1,89     | 9,32<br>2,91<br>1,68    | 0,11<br>0,00<br>0,10   | 0,65<br>0,01<br>0,12   | 0,03<br>0,00<br>0,03  | 0,10<br>0,01<br>0,02  |
| 50        | 137,81<br>0,49<br>3,43  | 81,73<br>0,68<br>2,91   | 7,31<br>0,10<br>1,00     | 17,64<br>0,29<br>0,77   | -1,46<br>0,00<br>0,25  | 8,37<br>0,02<br>0,66   | -0,04<br>0,03<br>0,25 | 0,14<br>0,03<br>0,66  |
| 100       | 192,35<br>0,95<br>3,22  | 71,64<br>1,47<br>2,97   | 5,23<br>0,08<br>0,88     | 17,24<br>0,44<br>0,96   | -0,25<br>0,01<br>0,10  | 0,05<br>0,04<br>0,31   | -0,05<br>0,09<br>0,03 | 0,51<br>1,17<br>0,67  |

| $k=0,01$ | 0,2                       | 0,5                      | 1                        | 2                      | 5                       | 10                      | 20                    | 50                     |
|----------|---------------------------|--------------------------|--------------------------|------------------------|-------------------------|-------------------------|-----------------------|------------------------|
| 0,5      | 1,65<br>1897,67<br>14,59  | 0,77<br>2203,86<br>12,56 |                          |                        |                         |                         |                       |                        |
| 1        | 2,02<br>716,95<br>14,42   | 14,50<br>901,15<br>12,12 | 0,82<br>1082,02<br>13,72 | 0,36<br>955,71<br>9,77 |                         |                         |                       |                        |
| 2        | -26,58<br>410,69<br>15,81 | 346,17<br>489,18<br>9,60 | 2,35<br>335,59<br>12,54  | 0,66<br>387,69<br>8,20 | 0,76<br>434,81<br>12,69 | 0,28<br>510,50<br>7,89  |                       |                        |
| 5        | 20,66<br>105,16<br>13,26  | 5,01<br>151,98<br>9,71   | 5,79<br>65,69<br>7,29    | 2,24<br>107,66<br>4,91 | -2,97<br>52,06<br>4,88  | 43,50<br>107,71<br>4,22 | 0,50<br>64,91<br>5,64 | 0,43<br>108,10<br>3,38 |
| 10       | 42,64<br>41,31<br>9,93    | 8,93<br>54,77<br>5,96    | 11,89<br>33,57<br>5,14   | 4,27<br>40,90<br>3,58  | 1,48<br>8,53<br>1,92    | 1,85<br>23,41<br>2,04   | 0,36<br>1,62<br>0,89  | 0,52<br>23,09<br>2,98  |
| 20       | 74,08<br>9,06<br>3,89     | 18,41<br>10,69<br>3,32   | 18,51<br>4,25<br>2,23    | 9,67<br>5,55<br>1,95   | 1,41<br>0,79<br>0,85    | 2,80<br>2,71<br>1,85    | 0,11<br>0,01<br>0,08  | 0,23<br>0,02<br>0,08   |
| 50       | 146,04<br>1,52<br>5,75    | 47,61<br>1,78<br>5,74    | 27,24<br>1,03<br>2,73    | 17,50<br>1,47<br>2,59  | 0,12<br>0,04<br>0,25    | 0,76<br>0,38<br>0,47    | -0,03<br>0,00<br>0,45 | 0,19<br>0,04<br>1,91   |
| 100      | 188,58<br>1,76<br>4,15    | 99,81<br>2,10<br>3,94    | 20,40<br>1,04<br>2,12    | 36,19<br>1,61<br>2,39  | -0,38<br>0,01<br>0,20   | 4,14<br>0,06<br>0,25    | 0,06<br>0,10<br>0,80  | 0,07<br>0,26<br>0,06   |

R=0.1

| $k=0,02$ | 0,2                        | 0,5                        | 1                         | 2                         | 5                         | 10                        | 20                    | 50                     |
|----------|----------------------------|----------------------------|---------------------------|---------------------------|---------------------------|---------------------------|-----------------------|------------------------|
| 0,5      | 2,25<br>1795,49<br>31,71   | 1,73<br>2353,40<br>42,13   |                           |                           |                           |                           |                       |                        |
| 1        | 0,73<br>761,23<br>16,42    | 21,15<br>925,20<br>12,62   | -2,11<br>727,75<br>19,34  | 13,13<br>874,96<br>16,55  |                           |                           |                       |                        |
| 2        | -294,10<br>289,09<br>18,58 | 1750,93<br>384,17<br>13,44 | -16,19<br>325,60<br>17,27 | 183,46<br>399,19<br>13,25 | -32,01<br>461,22<br>16,82 | 229,90<br>479,27<br>12,41 |                       |                        |
| 5        | -6,58<br>107,61<br>18,39   | 274,32<br>136,72<br>14,02  | 6,95<br>110,11<br>13,02   | 1,97<br>128,29<br>9,71    | 2,41<br>68,48<br>9,65     | 1,11<br>105,66<br>8,52    | 0,72<br>88,92<br>8,78 | 0,43<br>119,92<br>7,64 |
| 10       | 42,67<br>41,88<br>12,99    | 9,07<br>43,45<br>10,84     | 14,30<br>29,98<br>8,59    | 4,55<br>36,32<br>6,81     | 4,19<br>26,11<br>5,03     | 2,41<br>31,88<br>5,75     | 0,12<br>11,02<br>2,58 | 8,44<br>21,33<br>2,14  |
| 20       | 76,68<br>8,21<br>7,00      | 17,45<br>9,32<br>6,89      | 23,96<br>8,29<br>7,25     | 8,66<br>9,84<br>7,63      | 4,85<br>2,77<br>4,05      | 4,28<br>5,29<br>6,11      | 1,08<br>2,68<br>0,90  | 1,24<br>5,00<br>1,64   |
| 50       | 143,49<br>3,77<br>9,16     | 48,21<br>3,73<br>10,30     | 36,29<br>2,50<br>6,14     | 19,52<br>3,12<br>6,31     | 4,10<br>1,58<br>1,95      | 8,00<br>3,44<br>2,83      | 0,15<br>0,12<br>0,36  | 0,48<br>0,54<br>0,85   |
| 100      | 147,33<br>2,51<br>7,13     | 104,25<br>2,61<br>5,93     | 32,80<br>3,19<br>4,76     | 22,39<br>3,37<br>4,91     | 0,81<br>0,32<br>1,37      | 5,59<br>1,15<br>3,75      | 0,18<br>0,23<br>0,57  | 1,98<br>0,69<br>1,38   |
|          |                            |                            |                           |                           |                           |                           | 0,55<br>5,74<br>1,94  | 0,60<br>6,96<br>2,52   |
|          |                            |                            |                           |                           |                           |                           | 0,31<br>11,39<br>4,44 | 0,32<br>10,93<br>4,54  |
|          |                            |                            |                           |                           |                           |                           | 0,23<br>4,62<br>5,20  | 0,40<br>3,91<br>6,39   |
|          |                            |                            |                           |                           |                           |                           | 0,07<br>3,35<br>4,15  | 0,47<br>3,51<br>5,30   |
|          |                            |                            |                           |                           |                           |                           | -0,46<br>4,32<br>6,08 | 0,71<br>5,29<br>4,72   |

| $k=0,05$ | 0,2                            | 0,5                            | 1                              | 2                               | 5                         | 10                        | 20                      | 50                      |
|----------|--------------------------------|--------------------------------|--------------------------------|---------------------------------|---------------------------|---------------------------|-------------------------|-------------------------|
| 0,5      | -168871,3<br>-36335,5<br>738,2 | 681284,6<br>147843,1<br>2441,9 |                                |                                 |                           |                           |                         |                         |
| 1        | -73061,9<br>-10486,4<br>1357,5 | 471201,6<br>72608,2<br>8946,4  | -5363,09<br>-1092,72<br>251,75 | 53365,69<br>18488,61<br>2090,03 |                           |                           |                         |                         |
| 2        | -168,7<br>378,0<br>29,3        | 1032,0<br>341,4<br>27,9        | -20,83<br>330,73<br>32,41      | 233,99<br>354,14<br>29,95       | -14,72<br>414,42<br>31,13 | 114,24<br>383,87<br>28,88 |                         |                         |
| 5        | 22,2<br>103,5<br>26,8          | 5,3<br>109,7<br>23,3           | 7,59<br>97,12<br>24,28         | 2,37<br>117,47<br>21,38         | 3,01<br>97,89<br>25,83    | 1,00<br>115,67<br>23,14   | 1,05<br>98,53<br>21,61  | 0,54<br>108,10<br>23,35 |
| 10       | 42,4<br>42,0<br>16,5           | 9,1<br>42,8<br>18,0            | 15,30<br>42,28<br>17,37        | 4,09<br>41,28<br>18,62          | 5,68<br>30,78<br>10,31    | 2,03<br>31,65<br>12,50    | 2,13<br>36,41<br>10,31  | 1,03<br>40,67<br>14,81  |
| 20       | 75,7<br>12,6<br>10,4           | 15,2<br>12,0<br>11,0           | 24,72<br>10,82<br>10,59        | 7,97<br>12,98<br>12,50          | 10,42<br>11,10<br>6,94    | 4,18<br>13,30<br>8,68     | 3,53<br>9,73<br>4,55    | 1,93<br>11,83<br>7,22   |
| 50       | 113,1<br>7,3<br>14,9           | 48,4<br>7,9<br>13,3            | 37,55<br>7,70<br>15,63         | 16,96<br>7,18<br>13,87          | 11,54<br>5,78<br>11,15    | 7,09<br>7,68<br>12,93     | 2,66<br>5,46<br>4,11    | 2,49<br>8,30<br>7,12    |
| 100      | 166,0<br>3,3<br>16,3           | 271,6<br>3,8<br>14,8           | 45,08<br>4,71<br>13,39         | 87,42<br>5,08<br>17,70          | 11,21<br>5,49<br>9,39     | 12,14<br>7,13<br>13,97    | 1,89<br>7,88<br>4,58    | 4,53<br>9,01<br>9,51    |
|          |                                |                                |                                |                                 |                           |                           | 0,74<br>8,84<br>6,94    | 0,82<br>8,97<br>8,67    |
|          |                                |                                |                                |                                 |                           |                           | 0,53<br>11,14<br>6,94   | 0,59<br>8,35<br>8,67    |
|          |                                |                                |                                |                                 |                           |                           | 0,08<br>9,67<br>12,98   | 0,43<br>7,99<br>16,85   |
|          |                                |                                |                                |                                 |                           |                           | 0,09<br>8,59<br>10,86   | 0,59<br>9,98<br>12,86   |
|          |                                |                                |                                |                                 |                           |                           | -0,51<br>10,69<br>11,72 | 0,25<br>10,95<br>11,01  |

R=0.2

$\tau_1 \times \text{frame rate}$

| $k=0,001$ | 0,2                     | 0,5                     | 1                       | 2                       | 5                     | 10                   | 20                   | 50                    |                      |
|-----------|-------------------------|-------------------------|-------------------------|-------------------------|-----------------------|----------------------|----------------------|-----------------------|----------------------|
| 0,5       | 1,46<br>5939,61<br>5,17 | 0,20<br>5839,80<br>0,78 |                         |                         |                       |                      |                      |                       |                      |
| 1         | 3,08<br>78,11<br>2,33   | 0,92<br>320,69<br>1,25  | 0,61<br>1353,60<br>3,87 | 0,29<br>1749,55<br>1,07 |                       |                      |                      |                       |                      |
| 2         | 7,74<br>571,27<br>4,16  | 1,47<br>777,18<br>1,65  | 0,07<br>0,01<br>0,58    | 0,28<br>0,01<br>0,50    | 0,02<br>0,04<br>0,47  | 0,18<br>0,14<br>0,47 |                      |                       |                      |
| 5         | 18,24<br>198,45<br>2,80 | 4,36<br>266,46<br>1,49  | 0,02<br>0,00<br>1,51    | 0,11<br>0,00<br>1,05    | 0,00<br>0,00<br>0,03  | 0,04<br>0,00<br>0,12 | 0,01<br>0,00<br>1,98 | 0,05<br>0,01<br>1,00  |                      |
| 10        | 39,09<br>65,60<br>2,66  | 9,20<br>81,02<br>1,40   | 2,35<br>0,00<br>1,20    | 3,38<br>0,00<br>1,52    | 0,00<br>0,00<br>0,01  | 0,02<br>0,00<br>0,01 | 0,01<br>0,00<br>0,01 | -0,01<br>0,00<br>0,16 | 0,10<br>0,01<br>0,17 |
| 20        | 54,46<br>1,18<br>1,12   | 24,03<br>4,21<br>0,80   | 0,00<br>0,00<br>0,08    | 0,05<br>0,00<br>0,07    | 0,00<br>0,00<br>0,01  | 0,01<br>0,00<br>0,01 | 0,00<br>0,00<br>0,02 | 0,01<br>0,00<br>0,01  | 0,08<br>0,03<br>0,22 |
| 50        | 84,28<br>0,05<br>0,86   | 48,16<br>0,09<br>0,56   | 0,01<br>0,00<br>0,07    | 0,04<br>0,00<br>0,06    | 0,00<br>0,00<br>0,01  | 0,01<br>0,00<br>0,01 | 0,00<br>0,00<br>0,00 | 0,01<br>0,01<br>0,03  | 0,02<br>0,03<br>0,38 |
| 100       | 130,14<br>0,11<br>1,04  | 77,14<br>0,15<br>0,34   | 0,00<br>0,00<br>0,07    | 0,04<br>0,01<br>0,07    | -2,47<br>6,91<br>1,14 | 5,91<br>0,00<br>2,59 | 0,00<br>0,00<br>0,01 | 0,01<br>0,01<br>0,01  | 0,03<br>0,01<br>0,01 |

| $k=0,002$ | 0,2                     | 0,5                     | 1                       | 2                       | 5                      | 10                     | 20                   | 50                    |                      |
|-----------|-------------------------|-------------------------|-------------------------|-------------------------|------------------------|------------------------|----------------------|-----------------------|----------------------|
| 0,5       | 1,43<br>4355,01<br>5,30 | 0,30<br>4037,51<br>1,40 |                         |                         |                        |                        |                      |                       |                      |
| 1         | 3,03<br>250,88<br>3,83  | 0,92<br>625,80<br>2,39  | 0,69<br>1418,45<br>4,67 | 0,27<br>1718,28<br>1,51 |                        |                        |                      |                       |                      |
| 2         | 8,21<br>475,12<br>5,42  | 1,41<br>577,67<br>2,00  | 0,37<br>32,47<br>1,38   | 0,56<br>148,96<br>0,86  | 0,13<br>104,49<br>1,62 | 0,27<br>368,51<br>1,13 |                      |                       |                      |
| 5         | 19,03<br>138,74<br>4,46 | 4,77<br>188,09<br>2,27  | 0,03<br>0,00<br>1,23    | 0,20<br>0,00<br>0,97    | 0,00<br>0,00<br>0,07   | 0,08<br>0,01<br>0,21   | 0,01<br>0,00<br>1,43 | 0,08<br>0,01<br>1,00  |                      |
| 10        | 41,04<br>41,74<br>3,26  | 8,50<br>65,65<br>1,96   | 1,00<br>0,00<br>0,69    | 2,44<br>0,00<br>1,02    | 0,00<br>0,00<br>0,02   | 0,04<br>0,00<br>0,01   | 0,03<br>0,00<br>0,45 | -0,01<br>0,01<br>0,38 | 0,15<br>0,03<br>0,38 |
| 20        | 28,67<br>1,48<br>1,73   | 317,95<br>4,24<br>1,25  | -0,01<br>0,00<br>0,25   | 0,11<br>0,00<br>0,25    | 0,01<br>0,00<br>0,01   | 0,03<br>0,00<br>0,01   | 0,02<br>0,00<br>0,03 | 0,00<br>0,01<br>0,02  | 0,04<br>0,43<br>0,68 |
| 50        | 112,78<br>0,17<br>1,25  | 48,02<br>0,28<br>0,84   | 0,00<br>0,00<br>0,14    | 0,08<br>0,00<br>0,12    | 0,00<br>0,00<br>0,02   | 0,01<br>0,00<br>0,00   | 0,01<br>0,00<br>0,01 | 0,02<br>0,02<br>0,07  | 0,05<br>0,06<br>0,45 |
| 100       | 146,48<br>0,20<br>1,55  | 78,34<br>0,33<br>1,39   | 0,01<br>0,00<br>0,13    | 0,08<br>0,01<br>0,12    | -3,27<br>-0,12<br>1,61 | 8,46<br>0,12<br>3,30   | 0,00<br>0,02<br>0,01 | 0,01<br>0,02<br>0,01  | 0,01<br>0,04<br>0,01 |

| $k=0,005$ | 0,2                     | 0,5                     | 1                       | 2                       | 5                      | 10                     | 20                   | 50                   |                       |
|-----------|-------------------------|-------------------------|-------------------------|-------------------------|------------------------|------------------------|----------------------|----------------------|-----------------------|
| 0,5       | 1,55<br>2911,27<br>6,31 | 0,53<br>2765,43<br>3,73 |                         |                         |                        |                        |                      |                      |                       |
| 1         | 3,51<br>759,38<br>6,46  | 0,79<br>1023,44<br>4,43 | 0,68<br>1262,17<br>4,69 | 0,30<br>1296,48<br>2,07 |                        |                        |                      |                      |                       |
| 2         | 2,82<br>391,23<br>6,12  | 51,42<br>458,76<br>3,57 | 1,41<br>241,23<br>3,15  | 0,67<br>456,12<br>1,54  | 0,43<br>332,58<br>3,69 | 0,30<br>479,36<br>1,59 |                      |                      |                       |
| 5         | 18,47<br>114,22<br>5,99 | 4,95<br>150,49<br>3,85  | 0,90<br>6,94<br>1,30    | 1,19<br>34,74<br>0,97   | 0,05<br>0,01<br>0,15   | 0,25<br>0,02<br>0,20   | 0,08<br>0,07<br>0,98 | 0,23<br>0,23<br>0,73 |                       |
| 10        | 39,93<br>39,92<br>4,06  | 9,33<br>54,63<br>2,76   | 1,02<br>2,01<br>0,89    | 2,34<br>9,89<br>0,76    | 0,01<br>0,00<br>0,06   | 0,11<br>0,01<br>0,05   | 0,08<br>0,01<br>0,03 | 0,02<br>1,70<br>0,78 | 0,19<br>8,32<br>0,67  |
| 20        | 73,03<br>8,76<br>2,45   | 18,94<br>12,12<br>1,72  | 0,16<br>0,00<br>0,69    | 1,15<br>0,01<br>0,57    | -0,01<br>0,00<br>0,04  | 0,06<br>0,01<br>0,04   | 0,05<br>0,01<br>0,02 | 0,01<br>0,01<br>0,09 | 0,07<br>0,03<br>0,08  |
| 50        | 111,39<br>0,49<br>1,95  | 49,84<br>0,74<br>1,56   | 0,02<br>0,00<br>0,57    | 0,21<br>0,01<br>0,46    | -0,06<br>-0,01<br>0,17 | 0,15<br>0,03<br>0,33   | 0,00<br>0,02<br>0,01 | 0,05<br>0,04<br>0,03 | -0,01<br>0,19<br>0,15 |
| 100       | 146,69<br>0,90<br>1,87  | 72,10<br>1,20<br>1,27   | 0,00<br>0,00<br>0,48    | 0,20<br>0,03<br>0,41    | -1,28<br>-0,05<br>0,62 | 5,12<br>0,09<br>1,96   | 0,00<br>0,04<br>0,02 | 0,03<br>0,04<br>0,02 | -0,03<br>0,11<br>0,03 |

| $k=0,01$ | 0,2                     | 0,5                      | 1                      | 2                      | 5                      | 10                     | 20                    | 50                    |                       |
|----------|-------------------------|--------------------------|------------------------|------------------------|------------------------|------------------------|-----------------------|-----------------------|-----------------------|
| 0,5      | 1,59<br>1801,25<br>9,37 | 0,82<br>2659,95<br>10,99 |                        |                        |                        |                        |                       |                       |                       |
| 1        | 3,64<br>586,78<br>8,02  | 0,86<br>882,13<br>6,15   | 0,71<br>607,75<br>7,49 | 0,42<br>832,60<br>5,29 |                        |                        |                       |                       |                       |
| 2        | 8,29<br>397,15<br>8,06  | 1,66<br>480,79<br>6,89   | 2,04<br>300,80<br>5,32 | 0,72<br>439,34<br>3,26 | 0,50<br>342,76<br>5,43 | 0,34<br>450,88<br>3,71 |                       |                       |                       |
| 5        | 18,95<br>83,40<br>6,83  | 5,37<br>114,05<br>4,91   | 3,94<br>62,94<br>2,73  | 2,27<br>108,11<br>2,61 | 0,39<br>11,24<br>0,89  | 0,61<br>39,11<br>0,87  | 0,20<br>22,21<br>1,43 | 0,31<br>54,49<br>0,91 |                       |
| 10       | 42,64<br>33,58<br>5,12  | 8,47<br>40,14<br>3,84    | 6,38<br>16,25<br>1,65  | 4,22<br>29,67<br>1,11  | 0,07<br>0,01<br>0,19   | 0,31<br>0,04<br>0,26   | 0,18<br>0,01<br>0,12  | 0,06<br>13,08<br>1,22 | 0,27<br>21,02<br>0,94 |
| 20       | 73,38<br>9,06<br>2,56   | 19,35<br>9,93<br>2,28    | 6,49<br>1,21<br>1,26   | 7,60<br>3,01<br>1,26   | 0,04<br>0,00<br>0,10   | 0,15<br>0,01<br>0,09   | 0,01<br>0,00<br>0,03  | 0,09<br>0,02<br>0,02  | 0,03<br>0,07<br>0,18  |
| 50       | 109,77<br>1,80<br>2,91  | 44,11<br>2,25<br>3,76    | 6,34<br>0,43<br>1,07   | 20,94<br>1,05<br>1,01  | -0,03<br>-0,01<br>0,18 | 0,16<br>0,04<br>0,22   | 0,01<br>0,00<br>0,02  | 0,06<br>0,04<br>0,02  | -0,05<br>0,01<br>0,18 |
| 100      | 149,60<br>1,14<br>3,47  | 76,84<br>1,55<br>3,12    | 3,86<br>0,15<br>0,94   | 17,66<br>0,69<br>0,89  | -0,52<br>-0,01<br>0,32 | 3,21<br>0,12<br>0,97   | -0,24<br>0,02<br>0,36 | 1,62<br>0,12<br>2,04  | 0,52<br>0,20<br>1,93  |

R=0.2

| $k=0,02$ | 0,2                                 | 0,5                              | 1                                        | 2                              | 5                                | 10                            | 20                            | 50                            |
|----------|-------------------------------------|----------------------------------|------------------------------------------|--------------------------------|----------------------------------|-------------------------------|-------------------------------|-------------------------------|
| 0,5      | 2,36<br>1831,48<br>17,73<br>27,61   | 1,70<br>2493,30                  |                                          |                                |                                  |                               |                               |                               |
| 1        | 0,33<br>794,81<br>10,49<br>10,88    | 23,18<br>1047,06<br>9,72<br>9,33 | 0,22<br>923,13<br>1070,10                |                                |                                  |                               |                               |                               |
| 2        | -104,04<br>334,90<br>10,04<br>10,42 | 813,92<br>322,04<br>7,05<br>6,51 | 2,05<br>292,53<br>374,56<br>9,72<br>9,33 | 1,71<br>371,70<br>393,33       | -30,24<br>216,85<br>7,47<br>6,43 |                               |                               |                               |
| 5        | 20,43<br>104,71<br>7,85<br>7,50     | 4,91<br>118,38<br>5,36<br>6,07   | 5,65<br>104,12<br>132,88<br>5,36<br>6,07 | 1,98<br>132,88<br>2,46<br>2,27 | 1,16<br>81,65<br>2,46<br>2,27    | 0,47<br>84,55<br>3,12<br>3,08 | 0,40                          |                               |
| 10       | 42,81<br>40,06<br>6,77<br>5,59      | 8,45<br>44,99<br>5,99<br>5,39    | 10,85<br>23,99<br>3,07<br>3,43           | 4,81<br>32,97<br>3,43          | 1,14<br>9,74<br>0,84<br>0,74     | 1,46<br>21,16<br>0,74         | 0,24<br>3,67<br>0,53<br>0,53  | 0,49<br>13,36<br>2,04<br>2,17 |
| 20       | 73,17<br>7,52<br>4,32<br>4,40       | 19,64<br>9,20<br>2,24<br>2,41    | 17,06<br>6,39<br>2,24<br>2,63            | 9,40<br>8,22<br>3,17           | 0,73<br>0,46<br>0,68<br>1,44     | 1,55<br>1,86<br>1,44          | 0,17<br>0,11<br>0,13<br>0,17  | 0,46<br>0,82<br>0,35<br>0,34  |
| 50       | 106,60<br>2,55<br>5,35<br>5,43      | 48,88<br>3,16<br>5,43            | 20,71<br>2,24<br>2,41<br>2,63            | 14,86<br>2,86<br>2,63          | 0,00<br>0,12<br>0,53<br>1,20     | 3,24<br>0,81<br>1,20          | 0,02<br>0,04<br>0,07<br>0,09  | 0,16<br>0,09<br>0,26<br>0,68  |
| 100      | 108,20<br>2,41<br>4,37<br>3,44      | 52,53<br>2,43<br>3,44            | 17,95<br>1,29<br>1,99<br>2,65            | 20,88<br>2,12<br>2,65          | -0,98<br>0,14<br>0,73<br>2,05    | 5,14<br>0,57<br>2,05          | 0,04<br>0,47<br>0,14<br>0,12  | 0,13<br>1,30<br>0,36<br>1,20  |
|          |                                     |                                  |                                          |                                |                                  |                               | -0,13<br>1,30<br>0,48<br>0,24 | 0,81<br>3,96<br>3,23<br>2,78  |
|          |                                     |                                  |                                          |                                |                                  |                               | -0,02<br>3,96<br>3,23<br>2,78 | 0,17<br>3,96<br>3,23<br>2,78  |
|          |                                     |                                  |                                          |                                |                                  |                               | -0,29<br>3,96<br>3,23<br>2,78 | 1,12<br>3,96<br>3,23<br>2,78  |
|          |                                     |                                  |                                          |                                |                                  |                               | -0,29<br>3,96<br>3,23<br>2,78 | 1,12<br>3,96<br>3,23<br>2,78  |
|          |                                     |                                  |                                          |                                |                                  |                               | -0,41<br>3,16<br>4,16         | 0,23<br>3,16<br>4,16          |
|          |                                     |                                  |                                          |                                |                                  |                               | -0,41<br>3,16<br>4,16         | 0,23<br>3,16<br>4,16          |

| $k=0,05$ | 0,2                                            | 0,5                            | 1                                                                 | 2                         | 5                                  | 10                              | 20                                    | 50                            |
|----------|------------------------------------------------|--------------------------------|-------------------------------------------------------------------|---------------------------|------------------------------------|---------------------------------|---------------------------------------|-------------------------------|
| 0,5      | -30592,50<br>-50534,72<br>516,95<br>1691,71    | -437086,91<br>239962,74        |                                                                   |                           |                                    |                                 |                                       |                               |
| 1        | -46,07<br>789,87<br>22,42<br>24,85             | 487,88<br>989,49<br>24,85      | -8620,34<br>60312,29<br>-1876,67<br>20109,00<br>211,65<br>1348,82 |                           |                                    |                                 |                                       |                               |
| 2        | 9,00<br>331,00<br>20,48<br>18,15               | 2,63<br>345,58<br>18,15        | -24,29<br>271,61<br>20,07<br>19,09                                | 269,02<br>323,42<br>19,09 | -10,61<br>113,43<br>14,89<br>16,63 |                                 |                                       |                               |
| 5        | 22,16<br>108,24<br>17,40<br>14,35              | 5,98<br>121,55<br>14,35        | 7,25<br>109,44<br>13,38<br>13,26                                  | 2,28<br>104,47<br>13,26   | 2,44<br>121,88<br>10,30<br>11,93   | 0,82<br>99,92<br>11,40<br>11,93 | 0,41                                  |                               |
| 10       | 43,69<br>42,03<br>8,99<br>9,15                 | 9,98<br>47,27<br>9,15          | 13,64<br>30,92<br>7,63<br>9,35                                    | 4,36<br>38,24<br>9,35     | 4,46<br>25,07<br>4,90<br>6,60      | 2,26<br>37,94<br>6,60           | 1,13<br>28,14<br>2,39<br>3,97         | 0,90<br>42,36<br>5,54<br>7,08 |
| 20       | 70,69<br>10,29<br>6,37<br>6,19<br>9,23<br>8,42 | 18,80<br>12,29<br>6,19<br>6,87 | 22,89<br>10,98<br>6,34<br>11,32                                   | 8,92<br>11,25<br>11,32    | 6,00<br>7,92<br>2,33<br>3,89       | 3,51<br>10,59<br>1,25           | 1,18<br>3,70<br>0,66<br>1,25          | 1,13<br>6,81<br>1,25          |
| 50       | 83,74<br>6,37<br>6,19<br>9,23<br>8,42          | 39,97<br>6,19<br>6,87          | 27,71<br>6,43<br>7,15<br>8,46                                     | 15,13<br>7,52<br>8,46     | 5,03<br>3,19<br>3,71<br>7,51       | 5,92<br>5,53<br>7,51            | 0,37<br>1,82<br>0,52<br>1,23          | 1,02<br>3,67<br>1,23          |
| 100      | 188,77<br>2,60<br>10,23<br>9,39                | 301,88<br>2,61<br>9,39         | 39,92<br>2,92<br>8,40<br>8,98                                     | 66,24<br>3,92<br>8,98     | 3,68<br>4,32<br>3,00<br>4,89       | 5,71<br>5,25<br>4,89            | -293,34<br>50,64<br>155,77<br>1541,88 | 2918,28<br>50,64<br>1,50      |
|          |                                                |                                |                                                                   |                           |                                    |                                 | -0,11<br>6,80<br>0,61<br>1,50         | 0,62<br>6,40<br>1,50          |
|          |                                                |                                |                                                                   |                           |                                    |                                 | -0,08<br>7,00<br>1,38<br>2,65         | 0,30<br>5,17<br>2,65          |
|          |                                                |                                |                                                                   |                           |                                    |                                 | -0,08<br>7,00<br>1,38<br>2,65         | 0,30<br>5,17<br>2,65          |
|          |                                                |                                |                                                                   |                           |                                    |                                 | -0,23<br>6,61<br>5,40<br>6,70         | 0,68<br>6,02<br>6,70          |
|          |                                                |                                |                                                                   |                           |                                    |                                 | -0,23<br>6,61<br>5,40<br>6,70         | 0,68<br>6,02<br>6,70          |
|          |                                                |                                |                                                                   |                           |                                    |                                 | -0,53<br>9,90<br>6,97<br>5,89         | 0,22<br>10,86<br>5,89         |
|          |                                                |                                |                                                                   |                           |                                    |                                 | -0,53<br>9,90<br>6,97<br>5,89         | 0,22<br>10,86<br>5,89         |



R=0.3

| $k=0,02$ | 0,2                        | 0,5                        | 1                       | 2                      | 5                        | 10                      | 20                                   | 50                    |
|----------|----------------------------|----------------------------|-------------------------|------------------------|--------------------------|-------------------------|--------------------------------------|-----------------------|
| 0,5      | -20,72<br>1605,17<br>17,16 | 223,98<br>2300,00<br>24,26 |                         |                        |                          |                         |                                      |                       |
| 1        | 0,28<br>634,64<br>8,95     | 25,52<br>807,04<br>9,81    | -0,50<br>841,14<br>7,01 | 9,00<br>904,26<br>7,32 |                          |                         |                                      |                       |
| 2        | -72,34<br>328,95<br>7,85   | 791,96<br>388,90<br>8,31   | 2,00<br>305,45<br>5,52  | 0,78<br>557,99<br>5,93 | -8,36<br>394,50<br>-4,19 | 86,62<br>401,84<br>3,49 |                                      |                       |
| 5        | 21,02<br>106,83<br>6,83    | 4,61<br>124,30<br>6,08     | 4,61<br>85,14<br>2,70   | 2,01<br>113,57<br>3,94 | 0,64<br>29,26<br>1,16    | 0,80<br>64,27<br>0,90   | 0,28<br>47,91<br>1,70                | 0,41<br>79,56<br>1,71 |
| 10       | 42,38<br>39,65<br>5,03     | 8,56<br>43,53<br>4,75      | 8,09<br>21,40<br>1,86   | 4,86<br>32,24<br>2,97  | 0,25<br>0,68<br>0,45     | 0,66<br>4,96<br>0,98    | 0,08<br>0,05<br>0,23                 | 0,23<br>0,13<br>0,21  |
| 20       | 73,19<br>10,74<br>4,23     | 20,85<br>10,98<br>4,16     | 10,55<br>3,58<br>1,82   | 8,29<br>6,25<br>3,01   | 0,23<br>0,01<br>0,21     | 0,85<br>0,04<br>0,22    | 0,06<br>0,03<br>0,06                 | 0,15<br>0,05<br>0,04  |
| 50       | 96,64<br>3,26<br>4,41      | 70,92<br>3,08<br>3,62      | 10,88<br>1,30<br>1,55   | 11,45<br>2,35<br>2,03  | -0,28<br>0,01<br>0,27    | 2,72<br>0,08<br>0,48    | 0,03<br>0,06<br>0,05                 | 0,11<br>0,12<br>0,07  |
| 100      | 93,00<br>1,42<br>4,85      | 69,39<br>1,63<br>3,78      | 11,76<br>0,88<br>1,72   | 15,40<br>1,49<br>2,08  | -0,22<br>0,25<br>0,34    | 2,15<br>0,95<br>1,21    | -0,15<br>0,37<br>0,29                | 1,57<br>0,87<br>1,56  |
|          |                            |                            |                         |                        |                          |                         | 0,05<br>0,21<br>0,12<br>0,01<br>0,25 | 0,29<br>31,24<br>1,12 |
|          |                            |                            |                         |                        |                          |                         | 0,01<br>12,30<br>0,64                | 0,25<br>10,07<br>0,81 |
|          |                            |                            |                         |                        |                          |                         | -0,09<br>5,58<br>1,85                | 0,27<br>4,38<br>2,03  |
|          |                            |                            |                         |                        |                          |                         | -0,21<br>2,71<br>1,17                | 0,25<br>2,34<br>1,15  |
|          |                            |                            |                         |                        |                          |                         | -0,56<br>2,38<br>3,43                | 0,65<br>3,05<br>2,64  |

| $k=0,05$ | 0,2                             | 0,5                              | 1                               | 2                                | 5                        | 10                       | 20                     | 50                     |
|----------|---------------------------------|----------------------------------|---------------------------------|----------------------------------|--------------------------|--------------------------|------------------------|------------------------|
| 0,5      | -93751,60<br>23592,28<br>207,97 | 547422,08<br>148761,09<br>850,41 |                                 |                                  |                          |                          |                        |                        |
| 1        | -32559,86<br>-3748,82<br>71,07  | 322349,38<br>46481,57<br>520,95  | -17946,39<br>-5465,96<br>415,44 | 133205,63<br>46223,41<br>2591,46 |                          |                          |                        |                        |
| 2        | 9,06<br>308,18<br>15,34         | 2,89<br>348,55<br>17,45          | 2,62<br>291,62<br>13,29         | 1,03<br>309,87<br>15,11          | -7,55<br>301,88<br>11,53 | 82,56<br>346,05<br>11,91 |                        |                        |
| 5        | 22,62<br>81,94<br>16,17         | 6,46<br>88,33<br>14,92           | 6,35<br>102,89<br>8,06          | 2,34<br>128,37<br>10,36          | 1,85<br>84,72<br>4,52    | 1,02<br>105,62<br>6,12   | 0,61<br>111,84<br>4,87 | 0,37<br>115,72<br>6,60 |
| 10       | 41,86<br>45,61<br>9,04          | 11,45<br>42,85<br>8,60           | 12,38<br>36,48<br>3,83          | 5,12<br>38,49<br>5,77            | 2,93<br>19,44<br>2,48    | 1,93<br>29,11<br>4,02    | 0,51<br>11,48<br>1,10  | 0,66<br>23,64<br>2,71  |
| 20       | 69,84<br>13,09<br>8,24          | 21,44<br>11,28<br>12,08          | 22,19<br>12,70<br>5,73          | 8,40<br>12,81<br>9,71            | 3,05<br>4,47<br>0,59     | 2,98<br>7,91<br>1,09     | 0,39<br>3,15<br>0,27   | 0,60<br>6,66<br>0,40   |
| 50       | 78,54<br>6,61<br>9,07           | 39,52<br>6,14<br>9,31            | 20,84<br>5,48<br>6,06           | 14,52<br>5,69<br>6,45            | 1,45<br>1,98<br>1,33     | 2,98<br>3,84<br>2,48     | 0,14<br>1,64<br>0,25   | 0,43<br>3,69<br>0,48   |
| 100      | 223,59<br>2,16<br>11,83         | 321,63<br>2,51<br>10,66          | 44,07<br>3,19<br>8,09           | 83,31<br>3,40<br>9,08            | 0,18<br>3,98<br>1,21     | 4,84<br>4,09<br>2,79     | -0,26<br>4,25<br>0,64  | 2,06<br>4,82<br>1,97   |
|          |                                 |                                  |                                 |                                  |                          |                          | 0,19<br>39,53<br>3,13  | 0,33<br>41,15<br>4,40  |
|          |                                 |                                  |                                 |                                  |                          |                          | 0,18<br>10,82<br>0,33  | 0,37<br>12,57<br>0,25  |
|          |                                 |                                  |                                 |                                  |                          |                          | 0,13<br>16,28<br>0,91  | 0,25<br>14,41<br>1,82  |
|          |                                 |                                  |                                 |                                  |                          |                          | -0,05<br>9,67<br>1,26  | 0,31<br>8,31<br>2,10   |
|          |                                 |                                  |                                 |                                  |                          |                          | -0,35<br>7,74<br>4,74  | 2,02<br>6,55<br>5,30   |
|          |                                 |                                  |                                 |                                  |                          |                          | -0,16<br>5,06<br>5,36  | 0,35<br>4,05<br>6,27   |
|          |                                 |                                  |                                 |                                  |                          |                          | -0,59<br>9,73<br>6,67  | 0,56<br>11,82<br>6,26  |

R=0.4

$\tau_1 \times \text{frame rate}$

| $k=0,001$ | 0,2                     | 0,5                     | 1                      | 2                       | 5                     | 10                   | 20                   | 50                   |
|-----------|-------------------------|-------------------------|------------------------|-------------------------|-----------------------|----------------------|----------------------|----------------------|
| 0,5       | 1,25<br>3513,75<br>2,46 | 0,40<br>4123,09<br>1,09 |                        |                         |                       |                      |                      |                      |
| 1         | 3,69<br>2629,44<br>2,33 | 0,48<br>2818,84<br>0,62 | 0,19<br>595,05<br>1,35 | 0,26<br>1313,41<br>0,54 |                       |                      |                      |                      |
| 2         | 6,81<br>783,64<br>1,52  | 1,92<br>994,37<br>0,94  | -0,01<br>0,00<br>0,22  | 0,13<br>0,01<br>0,21    | -0,01<br>0,01<br>0,20 | 0,08<br>0,02<br>0,18 |                      |                      |
| 5         | 12,07<br>123,06<br>0,84 | 5,49<br>199,17<br>0,69  | -0,01<br>0,00<br>0,08  | 0,05<br>0,00<br>0,07    | 0,00<br>0,00<br>0,01  | 0,02<br>0,00<br>0,01 | 0,00<br>0,00<br>0,03 | 0,02<br>0,01<br>0,03 |
| 10        | 24,13<br>22,18<br>0,83  | 10,73<br>41,52<br>0,68  | 0,00<br>0,00<br>0,07   | 0,05<br>0,00<br>0,05    | 0,00<br>0,00<br>0,01  | 0,01<br>0,00<br>0,00 | 0,00<br>0,00<br>0,01 | 0,02<br>0,00<br>0,06 |
| 20        | 25,04<br>0,81<br>1,14   | 21,72<br>4,47<br>0,67   | 0,00<br>0,00<br>0,05   | 0,03<br>0,00<br>0,04    | 0,00<br>0,00<br>0,01  | 0,01<br>0,00<br>0,00 | 0,00<br>0,01<br>0,16 | 0,04<br>0,04<br>0,11 |
| 50        | 36,09<br>0,05<br>1,31   | 37,61<br>0,12<br>0,45   | -0,06<br>-0,01<br>0,20 | 0,14<br>0,02<br>0,38    | 0,00<br>0,00<br>0,01  | 0,01<br>0,00<br>0,00 | 0,00<br>0,01<br>0,02 | 0,01<br>0,03<br>0,01 |
| 100       | 58,75<br>0,03<br>1,27   | 69,03<br>0,14<br>0,45   | -0,01<br>0,00<br>0,05  | 0,03<br>0,01<br>0,05    | -0,01<br>0,00<br>0,02 | 0,05<br>0,03<br>0,05 | 0,00<br>0,01<br>0,01 | 0,00<br>0,02<br>0,02 |

| $k=0,002$ | 0,2                     | 0,5                     | 1                       | 2                       | 5                      | 10                     | 20                   | 50                   |
|-----------|-------------------------|-------------------------|-------------------------|-------------------------|------------------------|------------------------|----------------------|----------------------|
| 0,5       | 1,34<br>2849,25<br>3,13 | 0,48<br>3413,91<br>1,80 |                         |                         |                        |                        |                      |                      |
| 1         | 3,66<br>1744,13<br>2,78 | 0,67<br>1659,65<br>1,27 | 0,36<br>1120,57<br>1,75 | 0,33<br>1514,10<br>0,63 |                        |                        |                      |                      |
| 2         | 7,83<br>662,35<br>2,42  | 1,49<br>724,25<br>1,32  | 0,04<br>0,01<br>0,44    | 0,24<br>0,02<br>0,32    | -0,02<br>12,54<br>0,43 | 0,15<br>123,90<br>0,33 |                      |                      |
| 5         | 17,42<br>134,38<br>1,64 | 5,02<br>170,53<br>1,09  | 0,00<br>0,00<br>0,19    | 0,11<br>0,00<br>0,15    | 0,00<br>0,01<br>0,01   | 0,03<br>0,00<br>0,01   | 0,00<br>0,00<br>0,08 | 0,04<br>0,02<br>0,06 |
| 10        | 33,27<br>44,48<br>1,21  | 10,42<br>61,96<br>1,05  | 0,00<br>0,00<br>0,14    | 0,09<br>0,00<br>0,12    | 0,00<br>0,00<br>0,01   | 0,02<br>0,00<br>0,01   | 0,00<br>0,01<br>0,13 | 0,04<br>0,03<br>0,11 |
| 20        | 21,89<br>2,58<br>1,39   | 208,21<br>7,35<br>1,10  | 0,00<br>0,00<br>0,11    | 0,06<br>0,00<br>0,10    | 0,00<br>0,00<br>0,01   | 0,01<br>0,00<br>0,00   | 0,00<br>0,01<br>0,02 | 0,06<br>0,11<br>0,18 |
| 50        | 95,99<br>0,18<br>1,51   | 53,70<br>0,30<br>0,93   | -0,12<br>-0,01<br>0,36  | 0,18<br>0,02<br>0,43    | 0,00<br>0,01<br>0,01   | 0,01<br>0,00<br>0,00   | 0,00<br>0,02<br>0,00 | 0,01<br>0,03<br>0,03 |
| 100       | 99,83<br>0,22<br>1,78   | 99,14<br>0,39<br>0,75   | -0,01<br>0,00<br>0,11   | 0,08<br>0,02<br>0,10    | 0,00<br>0,03<br>0,02   | 0,01<br>0,00<br>0,03   | 0,01<br>0,06<br>0,05 | 0,01<br>0,11<br>0,05 |

| $k=0,005$ | 0,2                     | 0,5                     | 1                      | 2                       | 5                      | 10                     | 20                    | 50                   |
|-----------|-------------------------|-------------------------|------------------------|-------------------------|------------------------|------------------------|-----------------------|----------------------|
| 0,5       | 1,55<br>2316,48<br>4,84 | 0,68<br>2266,35<br>4,65 |                        |                         |                        |                        |                       |                      |
| 1         | 3,51<br>898,81<br>3,68  | 0,92<br>1078,65<br>3,03 | 0,52<br>746,84<br>2,46 | 0,28<br>1065,65<br>1,75 |                        |                        |                       |                      |
| 2         | 8,33<br>524,01<br>3,81  | 1,56<br>608,29<br>2,88  | 0,63<br>74,33<br>1,00  | 0,64<br>196,69<br>0,62  | 0,07<br>160,92<br>1,06 | 0,27<br>343,15<br>0,68 |                       |                      |
| 5         | 18,11<br>101,87<br>2,82 | 5,27<br>141,39<br>2,76  | 0,09<br>0,01<br>0,49   | 0,42<br>0,03<br>0,39    | 0,01<br>0,00<br>0,05   | 0,09<br>0,02<br>0,04   | 0,10<br>0,05<br>0,18  | 0,05<br>0,02<br>0,20 |
| 10        | 37,83<br>40,33<br>2,34  | 9,63<br>55,55<br>2,10   | 0,25<br>0,00<br>0,41   | 1,21<br>0,01<br>0,40    | 0,01<br>0,00<br>0,03   | 0,05<br>0,01<br>0,02   | 0,00<br>0,01<br>0,03  | 0,04<br>0,01<br>0,02 |
| 20        | 65,21<br>4,66<br>2,59   | 21,36<br>8,23<br>2,21   | 0,02<br>0,00<br>0,29   | 0,16<br>0,01<br>0,25    | 0,00<br>0,01<br>0,03   | 0,02<br>0,00<br>0,02   | 0,01<br>0,01<br>0,06  | 0,04<br>0,03<br>0,04 |
| 50        | 98,40<br>0,80<br>2,32   | 47,02<br>1,07<br>1,62   | -0,10<br>-0,01<br>0,40 | 0,19<br>0,03<br>0,34    | 0,00<br>0,00<br>0,04   | 0,04<br>0,03<br>0,03   | 0,00<br>0,06<br>0,09  | 0,02<br>0,28<br>0,53 |
| 100       | 132,93<br>0,66<br>2,64  | 63,11<br>0,90<br>1,41   | -0,60<br>0,01<br>0,31  | 5,72<br>0,06<br>0,47    | 0,00<br>0,01<br>0,05   | 0,03<br>0,06<br>0,05   | -0,01<br>0,18<br>0,18 | 0,04<br>0,95<br>0,17 |

| $k=0,01$ | 0,2                     | 0,5                     | 1                      | 2                      | 5                      | 10                     | 20                    | 50                    |
|----------|-------------------------|-------------------------|------------------------|------------------------|------------------------|------------------------|-----------------------|-----------------------|
| 0,5      | 1,99<br>1670,50<br>6,85 | 1,05<br>1954,99<br>8,03 |                        |                        |                        |                        |                       |                       |
| 1        | 3,80<br>787,85<br>5,19  | 0,95<br>1023,60<br>5,79 | 0,59<br>830,84<br>3,99 | 0,33<br>989,01<br>3,33 |                        |                        |                       |                       |
| 2        | 8,33<br>323,64<br>5,38  | 1,81<br>382,95<br>5,33  | 1,26<br>216,71<br>1,52 | 0,79<br>354,16<br>0,84 | 0,23<br>306,53<br>1,91 | 0,29<br>471,29<br>1,49 |                       |                       |
| 5        | 20,33<br>119,44<br>4,32 | 5,05<br>123,36<br>4,11  | 1,12<br>22,52<br>0,70  | 1,22<br>59,85<br>0,47  | 0,07<br>0,03<br>0,14   | 0,20<br>0,08<br>0,16   | -0,01<br>2,64<br>0,38 | 0,19<br>17,63<br>0,28 |
| 10       | 39,41<br>36,29<br>3,65  | 21,63<br>45,11<br>3,52  | 0,92<br>2,76<br>0,52   | 1,95<br>10,85<br>0,35  | 0,01<br>0,02<br>0,07   | 0,11<br>0,03<br>0,06   | 0,01<br>0,03<br>0,06  | 0,08<br>4,96<br>0,47  |
| 20       | 73,26<br>10,75<br>3,42  | 18,49<br>13,09<br>2,97  | 0,89<br>0,16<br>0,51   | 2,93<br>1,11<br>0,41   | -0,01<br>0,00<br>0,06  | 0,08<br>0,02<br>0,02   | 0,01<br>0,03<br>0,01  | 0,05<br>0,03<br>0,11  |
| 50       | 98,28<br>1,62<br>3,47   | 44,98<br>1,91<br>2,42   | 0,16<br>0,00<br>0,51   | 1,88<br>0,05<br>0,50   | 0,00<br>0,00<br>0,07   | 0,08<br>0,05<br>0,12   | 0,00<br>0,01<br>0,03  | 0,04<br>0,06<br>0,02  |
| 100      | 105,13<br>1,15<br>3,31  | 60,88<br>1,34<br>1,86   | -2,52<br>0,02<br>0,63  | 13,45<br>0,14<br>0,94  | 0,00<br>0,07<br>0,12   | 0,07<br>0,18<br>0,09   | -0,17<br>0,08<br>0,21 | 2,03<br>0,24<br>1,27  |

R=0.4

| $k=0,02$ | 0,2                      |                          | 0,5                      |                        | 1                      |                        | 2                     |                       | 5                      |                       | 10                     |                       | 20                    |                      | 50                    |                      |
|----------|--------------------------|--------------------------|--------------------------|------------------------|------------------------|------------------------|-----------------------|-----------------------|------------------------|-----------------------|------------------------|-----------------------|-----------------------|----------------------|-----------------------|----------------------|
|          | 0,5                      | 3,34<br>2161,44<br>11,35 | 4,55<br>2725,14<br>16,54 |                        |                        |                        |                       |                       |                        |                       |                        |                       |                       |                      |                       |                      |
| 1        | 4,01<br>690,25<br>8,23   | 1,30<br>909,56<br>10,17  | 0,70<br>704,37<br>5,71   | 0,48<br>745,52<br>6,22 |                        |                        |                       |                       |                        |                       |                        |                       |                       |                      |                       |                      |
| 2        | -44,66<br>275,39<br>8,23 | 526,45<br>339,00<br>9,35 | 1,75<br>268,35<br>4,37   | 0,74<br>334,05<br>5,11 | 0,98<br>273,82<br>4,28 | 0,30<br>341,08<br>5,25 |                       |                       |                        |                       |                        |                       |                       |                      |                       |                      |
| 5        | 19,97<br>100,11<br>6,18  | 5,98<br>119,46<br>6,36   | 3,57<br>63,75<br>1,81    | 2,36<br>99,66<br>2,57  | 0,42<br>16,98<br>0,66  | 0,53<br>53,66<br>0,52  | 0,11<br>40,42<br>0,63 | 0,30<br>78,99<br>0,67 |                        |                       |                        |                       |                       |                      |                       |                      |
| 10       | -8,33<br>39,20<br>4,77   | 498,12<br>41,37<br>4,84  | 5,16<br>20,67<br>0,83    | 4,07<br>36,55<br>1,04  | 0,08<br>0,02<br>0,18   | 0,28<br>0,04<br>0,19   | 0,04<br>0,07<br>0,14  | 0,17<br>0,35<br>0,13  | -0,03<br>17,92<br>0,67 | 0,22<br>27,00<br>0,95 |                        |                       |                       |                      |                       |                      |
| 20       | 66,96<br>8,47<br>5,28    | 19,61<br>9,85<br>4,51    | 6,81<br>3,26<br>0,99     | 6,53<br>6,14<br>1,37   | 0,03<br>0,01<br>0,13   | 0,17<br>0,04<br>0,12   | 0,01<br>0,01<br>0,04  | 0,10<br>0,05<br>0,03  | 0,01<br>0,29<br>0,20   | 0,15<br>1,24<br>0,15  | -0,05<br>12,87<br>0,50 | 0,26<br>11,57<br>0,36 |                       |                      |                       |                      |
| 50       | 94,99<br>2,74<br>5,01    | 51,78<br>3,03<br>3,84    | 7,22<br>0,86<br>1,43     | 9,30<br>1,79<br>1,75   | 0,03<br>0,04<br>0,14   | 0,15<br>0,09<br>0,15   | 0,02<br>0,06<br>0,05  | 0,07<br>0,13<br>0,04  | 0,00<br>1,04<br>0,13   | 0,10<br>2,27<br>0,15  | -0,03<br>4,53<br>0,61  | 0,16<br>3,89<br>0,24  | -0,17<br>5,71<br>1,61 | 0,25<br>5,17<br>1,67 |                       |                      |
| 100      | 87,31<br>1,38<br>5,09    | 164,78<br>1,54<br>4,14   | 4,21<br>0,46<br>0,99     | 11,25<br>1,12<br>1,28  | 0,04<br>0,50<br>0,23   | 0,15<br>1,00<br>0,18   | -0,20<br>0,80<br>0,30 | 1,97<br>1,58<br>0,98  | -0,01<br>2,51<br>0,36  | 0,06<br>2,64<br>0,28  | -0,09<br>2,60<br>0,61  | 0,12<br>2,18<br>0,32  | -0,28<br>2,40<br>1,24 | 0,23<br>2,22<br>0,86 | -0,42<br>2,07<br>3,61 | 0,21<br>2,78<br>2,31 |

| $k=0,05$ | 0,2                     |                                | 0,5                             |                                  | 1                       |                         | 2                     |                        | 5                     |                       | 10                    |                       | 20                    |                      | 50                    |                      |
|----------|-------------------------|--------------------------------|---------------------------------|----------------------------------|-------------------------|-------------------------|-----------------------|------------------------|-----------------------|-----------------------|-----------------------|-----------------------|-----------------------|----------------------|-----------------------|----------------------|
|          | 0,5                     | -174985,6<br>-34786,4<br>392,8 | 734116,8<br>183713,9<br>1025,9  |                                  |                         |                         |                       |                        |                       |                       |                       |                       |                       |                      |                       |                      |
| 1        | -94,6<br>648,0<br>20,5  | 673,1<br>799,1<br>22,6         | -3946,77<br>-756,15<br>36,73    | 38239,12<br>15229,27<br>215,71   |                         |                         |                       |                        |                       |                       |                       |                       |                       |                      |                       |                      |
| 2        | 9,1<br>272,8<br>12,9    | 3,3<br>315,0<br>14,9           | -12509,58<br>-2057,47<br>248,55 | 124493,98<br>23834,43<br>2367,50 | 0,62<br>287,34<br>10,61 | 0,44<br>319,16<br>12,68 |                       |                        |                       |                       |                       |                       |                       |                      |                       |                      |
| 5        | -202,9<br>116,9<br>11,7 | 2231,7<br>130,4<br>11,6        | 5,89<br>122,58<br>6,18          | 2,45<br>120,22<br>8,10           | 1,45<br>81,48<br>3,25   | 1,00<br>109,05<br>5,94  | 0,39<br>92,20<br>2,76 | 0,42<br>119,47<br>3,67 |                       |                       |                       |                       |                       |                      |                       |                      |
| 10       | 44,0<br>40,3<br>8,0     | 13,2<br>40,5<br>8,8            | 11,26<br>31,80<br>4,49          | 5,04<br>40,34<br>7,12            | 1,45<br>13,00<br>0,82   | 1,61<br>25,43<br>1,68   | 0,41<br>14,63<br>0,62 | 0,54<br>26,89<br>1,21  | 0,11<br>33,80<br>3,46 | 0,29<br>37,95<br>5,17 |                       |                       |                       |                      |                       |                      |
| 20       | 69,1<br>11,8<br>9,8     | 26,9<br>12,1<br>12,4           | 20,37<br>11,37<br>6,10          | 11,20<br>10,44<br>10,71          | 1,50<br>1,79<br>1,51    | 2,43<br>5,28<br>4,15    | 0,13<br>0,95<br>0,14  | 0,36<br>3,04<br>0,11   | 0,03<br>9,39<br>0,32  | 0,26<br>12,79<br>0,24 | 0,02<br>13,16<br>0,53 | 0,29<br>12,91<br>0,85 |                       |                      |                       |                      |
| 50       | 86,0<br>4,0<br>10,8     | 116,8<br>4,3<br>9,6            | 16,74<br>4,32<br>6,88           | 13,41<br>5,26<br>7,15            | 0,56<br>1,92<br>0,86    | 3,71<br>3,89<br>2,05    | 0,00<br>1,25<br>0,19  | 0,20<br>3,51<br>0,19   | -0,11<br>7,34<br>0,54 | 1,02<br>8,07<br>0,67  | -0,14<br>9,28<br>1,02 | 0,81<br>6,28<br>0,93  | -0,12<br>7,82<br>5,39 | 0,26<br>6,35<br>6,42 |                       |                      |
| 100      | 151,7<br>2,1<br>12,0    | 238,0<br>2,7<br>11,5           | 41,24<br>3,71<br>5,50           | 76,86<br>4,66<br>7,16            | 0,35<br>4,45<br>0,87    | 1,52<br>4,43<br>2,04    | -0,19<br>4,76<br>0,56 | 2,15<br>4,72<br>0,86   | -0,06<br>5,97<br>0,58 | 0,12<br>4,51<br>0,37  | -0,17<br>5,60<br>0,88 | 0,23<br>3,74<br>0,43  | -0,39<br>3,51<br>4,28 | 1,29<br>3,49<br>3,81 | -0,66<br>5,64<br>6,72 | 0,50<br>7,26<br>5,89 |

R=0.5

$\tau_1 \times \text{frame rate}$

| $k=0,001$ | 0,2                     | 0,5                     | 1                        | 2                       | 5                      | 10                   | 20                   | 50                   |
|-----------|-------------------------|-------------------------|--------------------------|-------------------------|------------------------|----------------------|----------------------|----------------------|
| 0,5       | 1,45<br>3362,60<br>2,51 | 0,31<br>3180,67<br>1,15 |                          |                         |                        |                      |                      |                      |
| 1         | 3,30<br>735,28<br>1,90  | 0,72<br>1270,12<br>1,17 | -0,34<br>1184,95<br>1,18 | 3,53<br>1968,92<br>0,40 |                        |                      |                      |                      |
| 2         | 7,23<br>1017,17<br>1,35 | 1,85<br>1146,87<br>0,66 | 0,01<br>0,00<br>0,13     | 0,12<br>0,01<br>0,15    | -0,01<br>0,01<br>0,19  | 0,06<br>0,04<br>0,13 |                      |                      |
| 5         | 9,32<br>83,07<br>0,80   | 6,21<br>178,09<br>0,54  | 0,00<br>0,00<br>0,07     | 0,05<br>0,00<br>0,05    | -0,01<br>0,00<br>0,01  | 0,01<br>0,00<br>0,04 | 0,00<br>0,00<br>0,03 |                      |
| 10        | 15,98<br>10,96<br>1,00  | 11,11<br>24,82<br>0,58  | -0,01<br>0,00<br>0,05    | 0,03<br>0,00<br>0,05    | 0,00<br>0,00<br>0,00   | 0,01<br>0,00<br>0,01 | 0,08<br>0,09<br>0,06 | 0,02<br>0,02<br>0,05 |
| 20        | 15,36<br>0,89<br>1,18   | 18,46<br>4,26<br>0,64   | 0,00<br>0,00<br>0,04     | 0,02<br>0,00<br>0,03    | 0,00<br>0,00<br>0,00   | 0,01<br>0,00<br>0,00 | 0,00<br>0,01<br>0,15 | 0,03<br>0,05<br>0,11 |
| 50        | 36,02<br>0,07<br>1,46   | 39,34<br>0,17<br>0,56   | -0,27<br>-0,05<br>0,63   | 0,26<br>0,05<br>0,56    | 0,00<br>0,00<br>0,01   | 0,01<br>0,01<br>0,00 | 0,00<br>0,01<br>0,01 | 0,01<br>0,04<br>0,18 |
| 100       | 50,77<br>0,08<br>1,72   | 69,80<br>0,24<br>0,46   | 0,00<br>0,00<br>0,05     | 0,04<br>0,02<br>0,06    | -0,02<br>-0,01<br>0,03 | 0,08<br>0,06<br>0,08 | 0,00<br>0,02<br>0,01 | 0,00<br>0,03<br>0,02 |

| $k=0,002$ | 0,2                     | 0,5                     | 1                       | 2                       | 5                      | 10                   | 20                   | 50                   |
|-----------|-------------------------|-------------------------|-------------------------|-------------------------|------------------------|----------------------|----------------------|----------------------|
| 0,5       | 1,40<br>2796,40<br>2,60 | 0,40<br>2989,50<br>1,46 |                         |                         |                        |                      |                      |                      |
| 1         | 3,23<br>398,32<br>2,22  | 0,82<br>723,85<br>1,46  | 0,46<br>1583,98<br>1,71 | 0,28<br>1725,59<br>0,57 |                        |                      |                      |                      |
| 2         | 7,48<br>788,71<br>1,67  | 2,86<br>792,29<br>1,03  | 0,02<br>10,05<br>0,39   | 0,25<br>99,88<br>0,31   | -0,01<br>0,05<br>0,34  | 0,14<br>0,11<br>0,27 |                      |                      |
| 5         | 14,80<br>106,83<br>1,06 | 6,01<br>149,88<br>0,81  | 0,01<br>0,00<br>0,13    | 0,08<br>0,01<br>0,09    | 0,00<br>0,01<br>0,01   | 0,03<br>0,02<br>0,06 | 0,00<br>0,00<br>0,02 |                      |
| 10        | 28,37<br>35,63<br>1,17  | 12,62<br>57,37<br>1,08  | 0,00<br>0,00<br>0,10    | 0,07<br>0,00<br>0,08    | 0,00<br>0,00<br>0,01   | 0,02<br>0,00<br>0,01 | 0,00<br>0,01<br>0,15 | 0,04<br>0,03<br>0,10 |
| 20        | 41,76<br>2,47<br>1,59   | 27,00<br>8,34<br>1,13   | -0,01<br>0,00<br>0,09   | 0,06<br>0,00<br>0,07    | 0,00<br>0,00<br>0,01   | 0,01<br>0,00<br>0,00 | 0,00<br>0,02<br>0,02 | 0,01<br>0,13<br>0,16 |
| 50        | 80,15<br>0,23<br>1,97   | 53,41<br>0,52<br>0,86   | -0,21<br>-0,04<br>0,54  | 0,22<br>0,04<br>0,48    | 0,00<br>0,01<br>0,01   | 0,00<br>0,01<br>0,00 | 0,01<br>0,03<br>0,03 | 0,02<br>0,08<br>0,02 |
| 100       | 102,29<br>0,28<br>2,11  | 68,27<br>0,45<br>0,65   | -1,30<br>0,00<br>0,29   | 7,40<br>0,06<br>1,17    | -0,02<br>-0,01<br>0,03 | 0,07<br>0,06<br>0,06 | 0,00<br>0,01<br>0,02 | 0,01<br>0,03<br>0,03 |

| $k=0,005$ | 0,2                     | 0,5                     | 1                       | 2                       | 5                     | 10                     | 20                    | 50                   |
|-----------|-------------------------|-------------------------|-------------------------|-------------------------|-----------------------|------------------------|-----------------------|----------------------|
| 0,5       | 1,56<br>1831,34<br>4,45 | 0,77<br>2184,79<br>5,26 |                         |                         |                       |                        |                       |                      |
| 1         | 3,53<br>662,53<br>3,23  | 0,87<br>843,53<br>3,26  | 0,53<br>1472,40<br>2,16 | 0,24<br>1544,04<br>1,37 |                       |                        |                       |                      |
| 2         | 8,10<br>491,25<br>3,03  | 1,70<br>617,43<br>2,66  | 0,46<br>124,46<br>0,72  | 0,55<br>298,16<br>0,44  | 0,02<br>94,86<br>0,75 | 0,27<br>252,30<br>0,44 |                       |                      |
| 5         | 17,07<br>75,18<br>2,66  | 5,85<br>115,18<br>2,40  | 0,00<br>0,00<br>0,39    | 0,21<br>0,01<br>0,30    | 0,00<br>0,02<br>0,04  | 0,07<br>0,01<br>0,03   | -0,02<br>0,01<br>0,18 | 0,09<br>0,06<br>0,16 |
| 10        | 36,75<br>34,93<br>2,25  | 9,90<br>44,80<br>2,16   | 0,05<br>0,00<br>0,29    | 0,59<br>0,01<br>0,22    | 0,00<br>0,01<br>0,02  | 0,04<br>0,02<br>0,02   | 0,00<br>0,02<br>0,30  | 0,03<br>0,28<br>0,24 |
| 20        | 54,38<br>7,65<br>2,52   | 76,05<br>10,83<br>2,27  | 0,00<br>0,00<br>0,28    | 0,15<br>0,01<br>0,20    | 0,01<br>0,01<br>0,02  | 0,03<br>0,02<br>0,01   | 0,00<br>0,04<br>0,05  | 0,02<br>0,04<br>0,38 |
| 50        | 113,64<br>1,45<br>2,58  | 49,58<br>2,28<br>1,80   | -0,17<br>-0,02<br>0,48  | 0,23<br>0,04<br>0,39    | 0,00<br>0,02<br>0,03  | 0,03<br>0,02<br>0,01   | 0,00<br>0,06<br>0,01  | 0,05<br>0,55<br>0,10 |
| 100       | 116,77<br>0,74<br>3,10  | 56,36<br>0,76<br>1,50   | -1,81<br>0,00<br>0,50   | 8,72<br>0,09<br>1,22    | -0,01<br>0,03<br>0,06 | 0,05<br>0,09<br>0,05   | 0,00<br>0,01<br>0,05  | 0,02<br>1,02<br>0,13 |

| $k=0,01$ | 0,2                     | 0,5                     | 1                      | 2                       | 5                      | 10                     | 20                    | 50                    |
|----------|-------------------------|-------------------------|------------------------|-------------------------|------------------------|------------------------|-----------------------|-----------------------|
| 0,5      | 1,88<br>1825,15<br>6,73 | 1,34<br>2354,04<br>9,20 |                        |                         |                        |                        |                       |                       |
| 1        | 3,61<br>548,38<br>4,41  | 1,15<br>837,44<br>5,37  | 0,53<br>975,23<br>2,98 | 0,32<br>1166,66<br>3,00 |                        |                        |                       |                       |
| 2        | 7,91<br>394,72<br>4,06  | 1,66<br>442,30<br>4,23  | 0,93<br>129,21<br>1,05 | 0,78<br>249,48<br>0,66  | 0,18<br>251,67<br>1,35 | 0,28<br>387,90<br>0,77 |                       |                       |
| 5        | 20,99<br>142,53<br>4,78 | 4,52<br>172,15<br>4,84  | 0,38<br>4,33<br>0,53   | 0,81<br>22,61<br>0,35   | 0,01<br>0,02<br>0,11   | 0,14<br>0,04<br>0,10   | -2,63<br>0,11<br>0,35 | 25,93<br>0,29<br>0,33 |
| 10       | 38,75<br>37,38<br>3,23  | 11,20<br>42,50<br>3,49  | 0,35<br>1,49<br>0,44   | 1,21<br>7,82<br>0,36    | 0,00<br>0,02<br>0,06   | 0,07<br>0,01<br>0,04   | 0,00<br>0,03<br>0,05  | 0,06<br>3,03<br>0,44  |
| 20       | 68,19<br>9,39<br>4,46   | 19,87<br>12,26<br>3,70  | -3,67<br>0,12<br>0,49  | 44,26<br>1,22<br>0,37   | -0,02<br>-0,01<br>0,09 | 0,10<br>0,03<br>0,17   | 0,00<br>0,03<br>0,02  | 0,04<br>0,10<br>0,12  |
| 50       | 86,80<br>2,03<br>3,78   | 53,49<br>2,38<br>2,99   | 0,01<br>0,00<br>0,41   | 0,34<br>0,05<br>0,33    | 0,00<br>0,06<br>0,06   | -0,01<br>0,01<br>0,03  | 0,03<br>0,07<br>0,02  | 0,00<br>0,25<br>0,05  |
| 100      | 80,76<br>1,13<br>3,95   | 66,86<br>1,31<br>3,02   | -1,25<br>0,08<br>0,56  | 7,49<br>0,24<br>1,16    | 0,01<br>0,15<br>0,13   | 0,06<br>0,38<br>0,11   | 0,00<br>0,27<br>0,10  | 0,05<br>0,71<br>0,24  |

R=0.5

| $k=0,02$ | 0,2                     |                           | 0,5                       |                        | 1                      |                        | 2                      |                        | 5                      |                       | 10                     |                       | 20                    |                      | 50                    |                      |
|----------|-------------------------|---------------------------|---------------------------|------------------------|------------------------|------------------------|------------------------|------------------------|------------------------|-----------------------|------------------------|-----------------------|-----------------------|----------------------|-----------------------|----------------------|
|          | 0,5                     | 15,20<br>1786,12<br>17,92 | 98,44<br>2510,69<br>23,24 |                        |                        |                        |                        |                        |                        |                       |                        |                       |                       |                      |                       |                      |
| 1        | 1,88<br>606,89<br>8,15  | 19,34<br>749,26<br>11,66  | 0,61<br>604,03<br>4,61    | 0,51<br>765,18<br>6,05 |                        |                        |                        |                        |                        |                       |                        |                       |                       |                      |                       |                      |
| 2        | 8,22<br>296,57<br>7,58  | 2,31<br>393,44<br>9,74    | 1,49<br>213,51<br>3,21    | 0,83<br>286,90<br>5,09 | 0,26<br>297,56<br>3,23 | 0,35<br>378,29<br>3,43 |                        |                        |                        |                       |                        |                       |                       |                      |                       |                      |
| 5        | 20,38<br>100,63<br>6,74 | 5,17<br>133,94<br>6,81    | 2,51<br>47,94<br>0,96     | 1,93<br>87,31<br>1,36  | 0,18<br>6,23<br>0,44   | 0,33<br>28,15<br>0,48  | -6,14<br>21,45<br>0,54 | 42,88<br>48,59<br>0,43 |                        |                       |                        |                       |                       |                      |                       |                      |
| 10       | 41,40<br>29,32<br>4,69  | 12,53<br>37,29<br>5,41    | 3,05<br>9,56<br>0,73      | 3,32<br>21,11<br>1,01  | 0,05<br>0,33<br>0,15   | 0,31<br>3,01<br>0,14   | 0,01<br>0,03<br>0,11   | 0,14<br>0,09<br>0,09   | -0,06<br>28,17<br>0,59 | 0,25<br>37,14<br>0,50 |                        |                       |                       |                      |                       |                      |
| 20       | 23,03<br>9,86<br>7,37   | 444,45<br>11,57<br>8,05   | 4,35<br>1,38<br>1,11      | 5,76<br>4,38<br>1,67   | -0,05<br>0,00<br>0,24  | 0,19<br>0,06<br>0,29   | 0,02<br>0,03<br>0,04   | 0,09<br>0,07<br>0,03   | 0,02<br>0,66<br>0,18   | 0,13<br>2,64<br>0,15  | -0,14<br>11,02<br>0,61 | 0,23<br>11,82<br>0,40 |                       |                      |                       |                      |
| 50       | 72,84<br>3,22<br>5,11   | 77,90<br>3,04<br>4,19     | 2,36<br>0,36<br>1,15      | 6,10<br>1,24<br>2,62   | 0,01<br>0,03<br>0,11   | 0,12<br>0,14<br>0,09   | 0,02<br>0,10<br>0,07   | 0,07<br>0,18<br>0,05   | -0,01<br>0,91<br>0,16  | 0,06<br>2,01<br>0,18  | -0,06<br>5,17<br>0,76  | 0,13<br>4,12<br>0,29  | -0,43<br>5,57<br>2,18 | 2,01<br>4,22<br>1,80 |                       |                      |
| 100      | 69,64<br>1,13<br>5,96   | 127,00<br>1,38<br>4,13    | 0,19<br>0,81<br>0,68      | 5,66<br>1,38<br>0,73   | 0,02<br>0,81<br>0,26   | 0,12<br>1,44<br>0,22   | -0,01<br>1,26<br>0,31  | 0,06<br>2,03<br>0,28   | -0,03<br>1,99<br>0,38  | 0,05<br>2,56<br>0,30  | -0,09<br>3,34<br>0,81  | 0,11<br>2,11<br>0,33  | -0,30<br>2,40<br>1,67 | 0,41<br>3,41<br>1,46 | -0,49<br>2,03<br>3,78 | 0,48<br>2,80<br>2,56 |

| $k=0,05$ | 0,2                             |                                   | 0,5                              |                                  | 1                      |                         | 2                     |                        | 5                      |                       | 10                    |                       | 20                    |                      | 50                    |                      |
|----------|---------------------------------|-----------------------------------|----------------------------------|----------------------------------|------------------------|-------------------------|-----------------------|------------------------|------------------------|-----------------------|-----------------------|-----------------------|-----------------------|----------------------|-----------------------|----------------------|
|          | 0,5                             | -96338,92<br>-20478,57<br>-164,16 | 573281,14<br>123968,51<br>648,46 |                                  |                        |                         |                       |                        |                        |                       |                       |                       |                       |                      |                       |                      |
| 1        | -47720,09<br>-5599,80<br>102,04 | 288714,02<br>40565,36<br>480,97   | -11752,40<br>-3274,34<br>166,20  | 109403,29<br>40339,56<br>1457,36 |                        |                         |                       |                        |                        |                       |                       |                       |                       |                      |                       |                      |
| 2        | -18524,46<br>-1156,24<br>167,17 | 182970,65<br>14592,11<br>1505,66  | -11943,88<br>-1920,06<br>189,68  | 118861,51<br>22718,50<br>1806,33 | 0,52<br>392,83<br>8,97 | 0,41<br>336,75<br>10,66 |                       |                        |                        |                       |                       |                       |                       |                      |                       |                      |
| 5        | -31,49<br>88,07<br>13,24        | 537,70<br>107,47<br>13,87         | 5,41<br>77,15<br>8,13            | 2,74<br>94,61<br>10,50           | 0,99<br>59,34<br>2,15  | 0,83<br>93,13<br>4,11   | 0,27<br>87,09<br>2,94 | 0,33<br>111,01<br>4,97 |                        |                       |                       |                       |                       |                      |                       |                      |
| 10       | 43,79<br>31,27<br>8,23          | 13,46<br>38,26<br>9,32            | 9,45<br>25,55<br>3,84            | 5,13<br>33,82<br>5,66            | 0,88<br>10,62<br>0,44  | 1,14<br>22,65<br>0,51   | 0,17<br>12,44<br>0,39 | 0,39<br>22,51<br>1,55  | -0,06<br>42,60<br>1,31 | 0,28<br>49,90<br>2,23 |                       |                       |                       |                      |                       |                      |
| 20       | 67,37<br>12,45<br>11,98         | 30,44<br>13,20<br>12,32           | 14,84<br>10,25<br>7,15           | 8,98<br>12,31<br>10,56           | 0,78<br>2,25<br>0,67   | 1,29<br>6,32<br>1,92    | 0,08<br>1,46<br>0,15  | 0,30<br>4,90<br>0,16   | -0,02<br>11,07<br>0,40 | 0,24<br>14,53<br>0,27 | 0,00<br>17,97<br>0,52 | 0,24<br>17,88<br>0,37 |                       |                      |                       |                      |
| 50       | 64,39<br>4,18<br>10,20          | 38,75<br>4,16<br>10,04            | 14,07<br>4,09<br>7,59            | 12,50<br>5,35<br>9,65            | 0,23<br>1,55<br>0,53   | 0,91<br>3,15<br>1,09    | 0,02<br>2,71<br>0,30  | 0,19<br>4,21<br>0,26   | -0,02<br>7,02<br>0,60  | 0,15<br>7,22<br>0,41  | -0,17<br>8,46<br>1,05 | 0,24<br>6,09<br>0,41  | -0,20<br>7,80<br>6,10 | 0,26<br>6,34<br>5,61 |                       |                      |
| 100      | 97,19<br>2,74<br>13,24          | 124,66<br>4,65<br>12,78           | 17,44<br>4,52<br>4,67            | 55,38<br>5,03<br>7,86            | 0,02<br>4,64<br>0,56   | 0,30<br>4,60<br>0,43    | -0,03<br>4,16<br>0,50 | 0,13<br>4,08<br>0,36   | -0,19<br>5,83<br>0,74  | 1,23<br>4,67<br>0,57  | -0,18<br>4,41<br>1,10 | 0,21<br>3,74<br>0,68  | -0,29<br>3,42<br>4,94 | 0,26<br>3,94<br>5,41 | -0,56<br>6,54<br>5,67 | 0,29<br>7,88<br>4,50 |

R=0.6

$\tau_1 \times \text{frame rate}$

| $k=0,001$ | 0,2                     | 0,5                     | 1                      | 2                       | 5                     | 10                   | 20                      | 50                     |
|-----------|-------------------------|-------------------------|------------------------|-------------------------|-----------------------|----------------------|-------------------------|------------------------|
| 0,5       | 1,40<br>3018,71<br>1,98 | 0,28<br>3157,93<br>0,81 |                        |                         |                       |                      |                         |                        |
| 1         | 2,34<br>42,24<br>1,18   | 1,03<br>280,61<br>0,93  | 0,08<br>875,04<br>0,85 | 0,27<br>1802,26<br>0,45 |                       |                      |                         |                        |
| 2         | 6,36<br>610,75<br>0,94  | 1,97<br>707,64<br>0,68  | 0,01<br>0,00<br>0,25   | 0,10<br>0,02<br>0,20    | -0,01<br>0,01<br>0,18 | 0,06<br>0,05<br>0,14 |                         |                        |
| 5         | 5,92<br>27,00<br>1,12   | 5,07<br>82,72<br>0,61   | 0,01<br>0,00<br>0,05   | 0,04<br>0,00<br>0,04    | 0,00<br>0,00<br>0,01  | 0,01<br>0,01<br>0,01 | -61,08<br>-0,03<br>0,58 | 114,38<br>0,06<br>0,92 |
| 10        | 12,91<br>11,16<br>1,50  | 11,79<br>25,59<br>1,09  | 0,01<br>0,00<br>0,04   | 0,03<br>0,00<br>0,03    | 0,00<br>0,00<br>0,00  | 0,01<br>0,00<br>0,00 | 0,00<br>0,00<br>0,01    | 0,02<br>0,02<br>0,08   |
| 20        | 10,08<br>0,55<br>1,51   | 15,30<br>3,89<br>0,62   | 0,00<br>0,00<br>0,03   | 0,02<br>0,00<br>0,02    | 0,00<br>0,00<br>0,00  | 0,01<br>0,00<br>0,00 | 0,00<br>0,01<br>0,17    | 0,03<br>0,07<br>0,13   |
| 50        | 25,65<br>0,11<br>1,70   | 34,89<br>0,42<br>0,50   | 0,00<br>0,00<br>0,04   | 0,03<br>0,01<br>0,03    | 0,00<br>0,00<br>0,00  | 0,01<br>0,01<br>0,00 | 0,00<br>0,02<br>0,00    | 0,01<br>0,05<br>0,01   |
| 100       | 23,08<br>0,08<br>1,94   | 37,35<br>0,23<br>0,35   | 0,00<br>0,00<br>0,04   | 0,02<br>0,02<br>0,03    | 0,00<br>0,00<br>0,01  | 0,03<br>0,03<br>0,01 | 0,00<br>0,04<br>0,06    | 0,01<br>0,18<br>0,06   |

| $k=0,002$ | 0,2                     | 0,5                     | 1                       | 2                       | 5                     | 10                   | 20                      | 50                     |
|-----------|-------------------------|-------------------------|-------------------------|-------------------------|-----------------------|----------------------|-------------------------|------------------------|
| 0,5       | 1,52<br>1808,62<br>3,04 | 0,43<br>2098,36<br>2,17 |                         |                         |                       |                      |                         |                        |
| 1         | 2,61<br>136,47<br>1,46  | 1,11<br>447,99<br>1,99  | 0,19<br>1618,55<br>1,12 | 0,30<br>2113,29<br>0,56 |                       |                      |                         |                        |
| 2         | 7,40<br>504,72<br>1,70  | 1,73<br>585,83<br>1,54  | -0,02<br>0,01<br>0,32   | 0,22<br>0,04<br>0,24    | -0,04<br>0,12<br>0,29 | 0,12<br>0,10<br>0,23 |                         |                        |
| 5         | 13,49<br>82,34<br>1,28  | 5,79<br>128,53<br>1,36  | 0,00<br>0,00<br>0,12    | 0,08<br>0,01<br>0,09    | 0,00<br>0,00<br>0,01  | 0,02<br>0,01<br>0,01 | -47,26<br>-0,03<br>0,55 | 103,31<br>0,07<br>0,88 |
| 10        | 24,41<br>21,54<br>1,51  | 12,66<br>36,51<br>1,29  | 0,00<br>0,00<br>0,08    | 0,06<br>0,00<br>0,07    | -0,01<br>0,00<br>0,02 | 0,05<br>0,01<br>0,06 | 0,00<br>0,01<br>0,01    | 0,03<br>0,04<br>0,11   |
| 20        | 2,78<br>2,48<br>1,91    | 357,01<br>5,27<br>1,30  | 0,00<br>0,00<br>0,08    | 0,05<br>0,01<br>0,07    | 0,00<br>0,01<br>0,01  | 0,01<br>0,00<br>0,00 | 0,00<br>0,02<br>0,02    | 0,01<br>0,16<br>0,21   |
| 50        | 71,19<br>0,80<br>2,20   | 47,97<br>1,25<br>0,96   | -0,01<br>0,00<br>0,07   | 0,06<br>0,02<br>0,07    | 0,00<br>0,01<br>0,01  | 0,01<br>0,02<br>0,01 | 0,00<br>0,04<br>0,03    | 0,01<br>0,10<br>0,02   |
| 100       | 88,71<br>0,38<br>2,58   | 66,46<br>0,51<br>0,84   | 0,00<br>0,00<br>0,08    | 0,04<br>0,04<br>0,06    | 0,00<br>0,05<br>0,03  | 0,00<br>0,01<br>0,02 | 0,01<br>0,10<br>0,15    | 0,01<br>0,06<br>0,15   |

| $k=0,005$ | 0,2                     | 0,5                     | 1                       | 2                       | 5                      | 10                     | 20                      | 50                    |
|-----------|-------------------------|-------------------------|-------------------------|-------------------------|------------------------|------------------------|-------------------------|-----------------------|
| 0,5       | 1,51<br>1527,27<br>4,44 | 0,84<br>1918,89<br>5,82 |                         |                         |                        |                        |                         |                       |
| 1         | 2,80<br>135,88<br>2,51  | 1,24<br>376,58<br>4,14  | 0,36<br>1013,68<br>1,59 | 0,33<br>1154,60<br>1,17 |                        |                        |                         |                       |
| 2         | 7,92<br>425,58<br>2,90  | 1,53<br>432,82<br>3,07  | 0,28<br>119,20<br>0,70  | 0,48<br>291,27<br>0,42  | -0,02<br>98,97<br>0,62 | 0,26<br>328,69<br>0,48 |                         |                       |
| 5         | 18,49<br>93,12<br>2,41  | 4,94<br>123,38<br>2,95  | 0,00<br>0,00<br>0,35    | 0,22<br>0,02<br>0,25    | 0,00<br>0,00<br>0,04   | 0,06<br>0,03<br>0,03   | -30,93<br>-0,01<br>0,56 | 85,00<br>0,09<br>0,68 |
| 10        | 34,44<br>39,62<br>2,37  | 10,70<br>53,39<br>2,36  | 0,01<br>0,00<br>0,19    | 0,13<br>0,01<br>0,15    | -0,01<br>0,00<br>0,04  | 0,05<br>0,02<br>0,07   | 0,00<br>0,02<br>0,03    | 0,03<br>0,17<br>0,25  |
| 20        | -20,36<br>9,23<br>2,94  | 798,84<br>10,71<br>2,70 | -0,02<br>0,00<br>0,20   | 0,11<br>0,01<br>0,15    | 0,00<br>0,01<br>0,02   | 0,03<br>0,00<br>0,03   | 0,00<br>0,02<br>0,06    | 0,10<br>3,45<br>0,34  |
| 50        | 99,56<br>1,71<br>3,29   | 45,26<br>2,18<br>2,02   | -0,02<br>0,00<br>0,22   | 0,13<br>0,03<br>0,17    | 0,00<br>0,03<br>0,03   | 0,04<br>0,04<br>0,04   | 0,00<br>0,10<br>0,01    | 0,04<br>1,17<br>0,18  |
| 100       | 100,60<br>0,71<br>3,62  | 77,89<br>0,89<br>1,82   | -0,03<br>0,01<br>0,22   | 0,11<br>0,09<br>0,17    | -0,01<br>0,02<br>0,06  | 0,05<br>0,11<br>0,05   | 0,00<br>0,15<br>0,07    | 0,01<br>0,15<br>0,07  |

| $k=0,01$ | 0,2                      | 0,5                      | 1                      | 2                      | 5                      | 10                     | 20                     | 50                    |
|----------|--------------------------|--------------------------|------------------------|------------------------|------------------------|------------------------|------------------------|-----------------------|
| 0,5      | 1,61<br>1873,06<br>14,02 | 6,08<br>2384,23<br>17,53 |                        |                        |                        |                        |                        |                       |
| 1        | 3,34<br>313,42<br>5,25   | 1,26<br>585,64<br>7,36   | 0,49<br>844,09<br>2,81 | 0,30<br>980,18<br>3,37 |                        |                        |                        |                       |
| 2        | 8,00<br>319,61<br>6,68   | 2,28<br>421,59<br>6,45   | 0,94<br>213,90<br>0,98 | 0,63<br>309,20<br>0,63 | 0,07<br>243,56<br>1,42 | 0,28<br>329,81<br>1,70 |                        |                       |
| 5        | 19,42<br>100,94<br>4,35  | 4,84<br>150,20<br>5,35   | 0,25<br>3,20<br>0,39   | 0,64<br>15,69<br>0,27  | 0,01<br>0,02<br>0,10   | 0,14<br>0,07<br>0,09   | -17,29<br>0,13<br>0,47 | 79,66<br>0,22<br>0,47 |
| 10       | 39,75<br>38,92<br>3,89   | 10,14<br>43,56<br>3,95   | 0,08<br>0,01<br>0,36   | 0,40<br>0,03<br>0,30   | 0,01<br>0,01<br>0,05   | 0,07<br>0,03<br>0,04   | 0,00<br>0,05<br>0,05   | 0,07<br>11,98<br>0,48 |
| 20       | 63,28<br>9,44<br>4,30    | 37,39<br>10,57<br>3,94   | 0,21<br>0,13<br>0,39   | 1,38<br>1,27<br>0,36   | -0,01<br>0,00<br>0,05  | 0,07<br>0,03<br>0,02   | 0,00<br>0,04<br>0,11   | 0,05<br>0,13<br>0,08  |
| 50       | 101,52<br>2,54<br>5,05   | 109,72<br>2,47<br>3,87   | -0,03<br>0,00<br>0,34  | 0,21<br>0,06<br>0,25   | 0,01<br>0,02<br>0,05   | 0,05<br>0,08<br>0,04   | 0,00<br>0,03<br>0,03   | 0,03<br>3,46<br>0,26  |
| 100      | 70,23<br>1,04<br>4,14    | 77,02<br>1,24<br>2,47    | -1,83<br>0,26<br>0,51  | 13,75<br>0,59<br>1,33  | 0,00<br>0,17<br>0,14   | 0,05<br>0,32<br>0,11   | 0,00<br>0,79<br>0,18   | 0,02<br>1,15<br>0,18  |

R=0.6

| $\tau \times$ frame rate | $k=0,02$ |         | 0,2    |        | 0,5    |        | 1     |       | 2     |       | 5     |       | 10    |      | 20    |      | 50 |  |
|--------------------------|----------|---------|--------|--------|--------|--------|-------|-------|-------|-------|-------|-------|-------|------|-------|------|----|--|
|                          | 0,5      | 6,91    | 52,79  |        |        |        |       |       |       |       |       |       |       |      |       |      |    |  |
| 1                        | 2347,58  | 2967,99 |        |        |        |        |       |       |       |       |       |       |       |      |       |      |    |  |
| 2                        | 19,17    | 22,67   |        |        |        |        |       |       |       |       |       |       |       |      |       |      |    |  |
| 5                        | 4,05     | 1,64    | -0,31  | 8,81   |        |        |       |       |       |       |       |       |       |      |       |      |    |  |
| 10                       | 710,36   | 860,39  | 701,11 | 812,59 |        |        |       |       |       |       |       |       |       |      |       |      |    |  |
| 20                       | 9,64     | 13,87   | 4,01   | 5,57   |        |        |       |       |       |       |       |       |       |      |       |      |    |  |
| 50                       | 8,38     | 2,32    | 1,41   | 0,68   | -13,39 | 134,58 |       |       |       |       |       |       |       |      |       |      |    |  |
| 100                      | 260,32   | 360,05  | 218,07 | 296,48 | 345,84 | 465,54 |       |       |       |       |       |       |       |      |       |      |    |  |
| 200                      | 8,02     | 9,25    | 4,04   | 6,28   | 1,96   | 2,69   |       |       |       |       |       |       |       |      |       |      |    |  |
| 500                      | -181,89  | 1577,53 | 1,96   | 1,72   | 0,05   | 0,30   | -6,15 | 35,46 |       |       |       |       |       |      |       |      |    |  |
| 1000                     | 101,68   | 118,06  | 51,98  | 86,93  | 5,18   | 22,61  | 19,08 | 52,13 |       |       |       |       |       |      |       |      |    |  |
| 2000                     | 6,63     | 7,32    | 0,93   | 1,93   | 0,32   | 0,23   | 0,59  | 0,51  |       |       |       |       |       |      |       |      |    |  |
| 5000                     | 42,66    | 12,25   | 2,62   | 3,05   | 0,01   | 0,16   | 0,01  | 0,12  | -0,04 | 0,19  |       |       |       |      |       |      |    |  |
| 10000                    | 34,63    | 39,50   | 11,13  | 23,85  | 0,01   | 0,07   | 0,05  | 0,13  | 26,06 | 33,48 |       |       |       |      |       |      |    |  |
| 20000                    | 6,00     | 5,48    | 0,60   | 0,90   | 0,12   | 0,09   | 0,12  | 0,10  | 0,75  | 1,04  |       |       |       |      |       |      |    |  |
| 50000                    | 64,05    | 27,24   | 2,65   | 4,12   | -3,16  | 13,66  | 0,02  | 0,08  | 0,01  | 0,10  | -0,16 | 0,22  |       |      |       |      |    |  |
| 100000                   | 9,80     | 11,54   | 0,99   | 3,00   | 0,00   | 0,08   | 0,04  | 0,11  | 1,37  | 3,61  | 12,36 | 13,57 |       |      |       |      |    |  |
| 200000                   | 6,83     | 6,67    | 0,85   | 1,31   | 0,66   | 2,17   | 0,04  | 0,03  | 0,22  | 0,16  | 0,90  | 0,53  |       |      |       |      |    |  |
| 500000                   | 75,96    | 51,63   | 0,40   | 6,80   | 0,02   | 0,12   | 0,01  | 0,07  | -0,01 | 0,07  | -0,08 | 0,15  | -0,20 | 0,22 |       |      |    |  |
| 1000000                  | 2,71     | 3,39    | 0,21   | 0,87   | 0,11   | 0,22   | 0,29  | 1,02  | 1,92  | 3,38  | 5,29  | 4,59  | 5,18  | 4,78 |       |      |    |  |
| 2000000                  | 7,61     | 6,43    | 0,82   | 2,10   | 0,12   | 0,10   | 0,09  | 0,12  | 0,29  | 0,33  | 0,99  | 0,41  | 2,86  | 2,22 |       |      |    |  |
| 5000000                  | 74,47    | 172,60  | -0,84  | 12,16  | 0,01   | 0,12   | -0,01 | 0,05  | -0,01 | 0,05  | -0,10 | 0,10  | -0,29 | 0,21 | -0,41 | 0,20 |    |  |
| 10000000                 | 1,68     | 2,08    | 1,32   | 1,83   | 1,24   | 1,97   | 1,78  | 2,35  | 3,29  | 2,96  | 2,60  | 1,96  | 2,09  | 2,15 | 1,45  | 2,24 |    |  |
| 20000000                 | 6,36     | 5,89    | 0,73   | 1,18   | 0,35   | 0,31   | 0,41  | 0,34  | 0,65  | 0,44  | 0,90  | 0,37  | 1,88  | 1,35 | 4,46  | 2,49 |    |  |

| $\tau \times$ frame rate | $k=0,05$  |           | 0,2       |           | 0,5      |          | 1     |        | 2     |       | 5     |       | 10    |      | 20    |      | 50 |  |
|--------------------------|-----------|-----------|-----------|-----------|----------|----------|-------|--------|-------|-------|-------|-------|-------|------|-------|------|----|--|
|                          | 0,5       | -140176,3 | 684331,6  |           |          |          |       |        |       |       |       |       |       |      |       |      |    |  |
| 1                        | -34149,1  | 182863,9  |           |           |          |          |       |        |       |       |       |       |       |      |       |      |    |  |
| 2                        | 268,4     | 916,9     |           |           |          |          |       |        |       |       |       |       |       |      |       |      |    |  |
| 5                        | -273616,5 | 835940,1  | -32990,61 | 188870,73 |          |          |       |        |       |       |       |       |       |      |       |      |    |  |
| 10                       | -36001,2  | 112502,2  | -10301,99 | 62096,01  |          |          |       |        |       |       |       |       |       |      |       |      |    |  |
| 20                       | 423,5     | 1160,0    | 237,53    | 1396,36   |          |          |       |        |       |       |       |       |       |      |       |      |    |  |
| 50                       | -59,2     | 669,2     | -7745,10  | 76716,94  | -3356,07 | 33396,50 |       |        |       |       |       |       |       |      |       |      |    |  |
| 100                      | 325,7     | 381,1     | -1143,89  | 14309,21  | -671,52  | 12353,71 |       |        |       |       |       |       |       |      |       |      |    |  |
| 200                      | 18,5      | 20,4      | 182,93    | 1725,09   | 124,11   | 1144,90  |       |        |       |       |       |       |       |      |       |      |    |  |
| 500                      | 23,4      | 8,5       | 4,40      | 2,36      | -1,88    | 24,48    | 0,12  | 0,33   |       |       |       |       |       |      |       |      |    |  |
| 1000                     | 92,6      | 101,9     | 100,21    | 128,14    | 49,34    | 82,74    | 87,10 | 114,94 |       |       |       |       |       |      |       |      |    |  |
| 2000                     | 15,2      | 15,5      | 4,10      | 6,73      | 1,89     | 4,30     | 1,91  | 4,17   |       |       |       |       |       |      |       |      |    |  |
| 5000                     | 40,3      | 24,7      | 4,79      | 23,45     | 0,44     | 0,70     | -0,01 | 0,26   | 0,00  | 0,25  |       |       |       |      |       |      |    |  |
| 10000                    | 40,7      | 38,7      | 24,57     | 33,60     | 7,23     | 20,46    | 4,43  | 14,06  | 46,72 | 44,31 |       |       |       |      |       |      |    |  |
| 20000                    | 11,2      | 13,8      | 4,80      | 6,47      | 0,39     | 0,29     | 0,29  | 0,46   | 2,54  | 4,10  |       |       |       |      |       |      |    |  |
| 50000                    | 67,9      | 33,9      | 12,75     | 10,48     | 0,41     | 1,10     | 0,04  | 0,20   | -0,04 | 0,17  | -0,09 | 0,24  |       |      |       |      |    |  |
| 100000                   | 11,6      | 13,0      | 13,09     | 14,89     | 1,19     | 4,54     | 1,12  | 4,32   | 13,18 | 14,18 | 17,71 | 16,42 |       |      |       |      |    |  |
| 200000                   | 17,6      | 16,1      | 6,65      | 10,79     | 0,37     | 0,43     | 0,13  | 0,12   | 0,63  | 0,42  | 0,81  | 0,48  |       |      |       |      |    |  |
| 500000                   | 60,0      | 63,7      | 8,43      | 9,28      | 0,07     | 0,29     | 0,00  | 0,15   | -0,05 | 0,15  | -0,19 | 0,21  | -0,23 | 0,23 |       |      |    |  |
| 1000000                  | 4,4       | 4,7       | 4,96      | 5,63      | 2,43     | 4,47     | 4,51  | 5,80   | 8,17  | 6,89  | 8,49  | 6,98  | 6,36  | 6,22 |       |      |    |  |
| 2000000                  | 18,8      | 18,3      | 6,16      | 9,59      | 0,43     | 0,33     | 0,46  | 0,41   | 0,79  | 0,48  | 1,44  | 0,87  | 6,08  | 5,04 |       |      |    |  |
| 5000000                  | 125,2     | 179,8     | 8,08      | 26,78     | 0,01     | 0,22     | -0,02 | 0,11   | -0,08 | 0,10  | -0,17 | 0,18  | -0,27 | 0,22 | -0,65 | 0,23 |    |  |
| 10000000                 | 3,3       | 4,1       | 5,78      | 6,42      | 5,84     | 5,12     | 5,44  | 4,60   | 6,17  | 4,84  | 4,91  | 3,98  | 3,16  | 3,09 | 4,52  | 6,48 |    |  |
| 20000000                 | 19,9      | 22,8      | 5,01      | 10,89     | 0,73     | 0,49     | 0,74  | 0,50   | 0,88  | 0,54  | 1,21  | 0,60  | 5,67  | 4,84 | 6,46  | 5,10 |    |  |

R=0.7

$\tau_1 \times \text{frame rate}$

| $k=0,001$ | 0,2                     | 0,5                     | 1                       | 2                      | 5                      | 10                   | 20                   | 50                   |
|-----------|-------------------------|-------------------------|-------------------------|------------------------|------------------------|----------------------|----------------------|----------------------|
| 0,5       | 1,35<br>2290,53<br>2,20 | 0,35<br>2665,98<br>1,69 |                         |                        |                        |                      |                      |                      |
| 1         | 3,37<br>1225,55<br>1,25 | 0,65<br>1559,70<br>0,82 | -0,76<br>130,72<br>3,26 | 0,27<br>510,52<br>1,09 |                        |                      |                      |                      |
| 2         | 5,40<br>325,02<br>0,92  | 2,17<br>591,29<br>0,77  | -0,02<br>0,00<br>0,14   | 0,11<br>0,03<br>0,23   | -0,01<br>0,02<br>0,20  | 0,06<br>0,06<br>0,16 |                      |                      |
| 5         | 5,61<br>41,09<br>1,43   | 4,42<br>88,23<br>0,72   | 0,00<br>0,00<br>0,04    | 0,03<br>0,01<br>0,03   | 0,00<br>0,00<br>0,01   | 0,01<br>0,00<br>0,07 | 0,00<br>0,00<br>0,12 |                      |
| 10        | 11,13<br>3,46<br>2,03   | 11,21<br>12,91<br>0,83  | 0,00<br>0,00<br>0,04    | 0,02<br>0,00<br>0,03   | 0,00<br>0,00<br>0,01   | 0,01<br>0,00<br>0,06 | 0,00<br>0,00<br>0,00 | 0,01<br>0,03<br>0,07 |
| 20        | 9,71<br>0,13<br>1,98    | 14,95<br>0,89<br>0,96   | 0,00<br>0,00<br>0,04    | 0,02<br>0,00<br>0,03   | -0,01<br>-0,01<br>0,15 | 0,07<br>0,03<br>0,33 | 0,00<br>0,00<br>0,00 | 0,00<br>0,01<br>0,01 |
| 50        | 11,76<br>0,10<br>1,92   | 33,17<br>0,42<br>0,65   | 0,00<br>0,00<br>0,03    | 0,02<br>0,01<br>0,03   | 0,00<br>0,00<br>0,01   | 0,00<br>0,00<br>0,00 | 0,00<br>0,02<br>0,02 | 0,01<br>0,08<br>0,01 |
| 100       | -2,08<br>0,04<br>2,29   | 75,69<br>0,18<br>0,66   | 0,00<br>0,00<br>0,04    | 0,02<br>0,02<br>0,02   | 0,00<br>0,00<br>0,01   | 0,00<br>0,00<br>0,06 | 0,00<br>0,03<br>0,16 | 0,00<br>0,03<br>0,03 |

| $k=0,002$ | 0,2                     | 0,5                     | 1                       | 2                       | 5                      | 10                   | 20                    | 50                   |
|-----------|-------------------------|-------------------------|-------------------------|-------------------------|------------------------|----------------------|-----------------------|----------------------|
| 0,5       | 1,44<br>2124,99<br>2,93 | 0,56<br>2352,05<br>3,14 |                         |                         |                        |                      |                       |                      |
| 1         | 3,47<br>1112,38<br>1,76 | 0,70<br>1247,10<br>1,85 | -0,40<br>864,85<br>2,19 | 0,39<br>1439,89<br>1,54 |                        |                      |                       |                      |
| 2         | 6,57<br>237,00<br>1,57  | 1,87<br>394,13<br>2,02  | -0,02<br>0,01<br>0,24   | 0,18<br>0,05<br>0,22    | -0,04<br>0,07<br>0,34  | 0,10<br>0,15<br>0,25 |                       |                      |
| 5         | 11,75<br>105,86<br>1,25 | 6,06<br>158,27<br>1,13  | 0,01<br>0,00<br>0,11    | 0,08<br>0,01<br>0,10    | 0,00<br>0,00<br>0,02   | 0,02<br>0,03<br>0,17 |                       |                      |
| 10        | 21,88<br>24,08<br>2,09  | 12,89<br>39,48<br>1,74  | 0,00<br>0,00<br>0,09    | 0,06<br>0,01<br>0,07    | 0,00<br>0,00<br>0,02   | 0,01<br>0,01<br>0,09 | 0,00<br>0,02<br>0,17  | 0,02<br>0,06<br>0,17 |
| 20        | -25,35<br>2,36<br>2,74  | 471,53<br>5,37<br>1,52  | 0,00<br>0,00<br>0,07    | 0,05<br>0,01<br>0,05    | -0,02<br>-0,01<br>0,18 | 0,07<br>0,03<br>0,30 | 0,00<br>0,00<br>0,00  | 0,01<br>0,03<br>0,02 |
| 50        | 62,16<br>0,49<br>2,75   | 49,81<br>0,98<br>1,37   | -0,01<br>0,00<br>0,08   | 0,06<br>0,02<br>0,11    | 0,00<br>0,00<br>0,01   | 0,01<br>0,02<br>0,01 | 0,00<br>0,05<br>0,01  | 0,01<br>0,26<br>0,05 |
| 100       | 53,02<br>0,26<br>3,30   | 105,67<br>0,51<br>1,20  | 0,00<br>0,01<br>0,08    | 0,04<br>0,05<br>0,05    | 0,00<br>0,00<br>0,03   | 0,01<br>0,06<br>0,03 | -0,02<br>0,09<br>0,23 | 0,07<br>0,14<br>0,06 |

| $k=0,005$ | 0,2                     | 0,5                     | 1                      | 2                       | 5                      | 10                     | 20                    | 50                   |
|-----------|-------------------------|-------------------------|------------------------|-------------------------|------------------------|------------------------|-----------------------|----------------------|
| 0,5       | 1,75<br>1418,39<br>6,07 | 0,98<br>1770,46<br>8,38 |                        |                         |                        |                        |                       |                      |
| 1         | 3,37<br>893,59<br>3,20  | 0,97<br>890,93<br>5,16  | 0,12<br>823,84<br>2,42 | 0,95<br>1282,44<br>2,54 |                        |                        |                       |                      |
| 2         | 7,45<br>184,92<br>5,17  | 1,87<br>288,40<br>6,42  | 0,19<br>78,99<br>0,56  | 0,39<br>225,88<br>0,34  | -0,07<br>99,80<br>0,53 | 0,21<br>286,07<br>0,33 |                       |                      |
| 5         | 18,28<br>74,60<br>3,53  | 5,27<br>110,94<br>3,79  | 0,00<br>0,01<br>0,47   | 0,20<br>0,03<br>0,36    | 0,01<br>0,04<br>0,04   | 0,05<br>0,09<br>0,53   |                       |                      |
| 10        | 33,18<br>41,46<br>3,22  | 13,53<br>45,72<br>3,16  | -0,01<br>0,00<br>0,31  | 0,13<br>0,01<br>0,25    | 0,00<br>0,00<br>0,03   | 0,03<br>0,02<br>0,06   | 0,00<br>0,27<br>0,35  | 0,06<br>1,10<br>0,25 |
| 20        | 51,38<br>7,50<br>4,08   | 54,38<br>9,48<br>3,57   | -0,02<br>0,00<br>0,19  | 0,11<br>0,02<br>0,17    | -0,01<br>0,00<br>0,11  | 0,06<br>0,03<br>0,23   | 0,00<br>0,03<br>0,02  | 0,04<br>0,07<br>0,07 |
| 50        | 78,06<br>1,15<br>4,83   | 51,93<br>1,80<br>3,08   | -0,03<br>-0,01<br>0,21 | 0,13<br>0,05<br>0,17    | 0,00<br>0,02<br>0,04   | 0,03<br>0,06<br>0,02   | 0,00<br>0,06<br>0,03  | 0,01<br>0,17<br>0,03 |
| 100       | 67,47<br>0,79<br>4,58   | 76,06<br>1,00<br>2,37   | -0,02<br>0,06<br>0,20  | 0,10<br>0,16<br>0,09    | 0,00<br>0,07<br>0,10   | 0,02<br>0,16<br>0,09   | -0,01<br>0,11<br>0,18 | 0,07<br>0,40<br>0,23 |

| $k=0,01$ | 0,2                        | 0,5                        | 1                        | 2                         | 5                      | 10                     | 20                     | 50                     |
|----------|----------------------------|----------------------------|--------------------------|---------------------------|------------------------|------------------------|------------------------|------------------------|
| 0,5      | -37,17<br>1999,38<br>17,30 | 320,51<br>2594,64<br>19,09 |                          |                           |                        |                        |                        |                        |
| 1        | 3,41<br>521,56<br>4,78     | 1,30<br>715,99<br>7,71     | -31,68<br>867,43<br>3,00 | 317,63<br>1024,66<br>4,11 |                        |                        |                        |                        |
| 2        | 7,58<br>201,51<br>7,08     | 1,94<br>275,94<br>8,52     | 0,68<br>190,84<br>0,88   | 0,54<br>325,97<br>0,57    | 0,07<br>342,62<br>1,38 | 0,24<br>419,34<br>1,95 |                        |                        |
| 5        | -51,37<br>104,16<br>5,73   | 705,04<br>116,89<br>6,32   | 0,10<br>1,24<br>0,59     | 0,41<br>12,14<br>0,43     | -3,30<br>0,01<br>0,14  | 32,68<br>0,08<br>0,38  | -12,11<br>1,65<br>0,52 | 52,69<br>10,87<br>0,61 |
| 10       | 37,66<br>36,10<br>5,75     | 11,95<br>46,90<br>6,08     | 0,04<br>0,01<br>0,47     | 0,32<br>0,04<br>0,32      | 0,00<br>0,00<br>0,08   | 0,07<br>0,94<br>0,16   | 0,06<br>0,02<br>0,12   | 0,06<br>0,07<br>0,18   |
| 20       | 66,61<br>8,20<br>5,97      | 26,31<br>8,79<br>4,89      | 0,02<br>0,00<br>0,34     | 0,22<br>0,04<br>0,30      | 0,00<br>0,04<br>0,10   | 0,06<br>0,06<br>0,18   | -0,01<br>0,00<br>0,03  | 0,06<br>0,06<br>0,05   |
| 50       | 54,67<br>2,00<br>6,50      | 141,11<br>2,51<br>6,05     | -0,71<br>0,01<br>0,44    | 6,73<br>0,10<br>0,90      | 0,00<br>0,02<br>0,06   | 0,05<br>0,11<br>0,05   | 0,00<br>0,05<br>0,11   | 0,03<br>0,17<br>0,15   |
| 100      | 65,48<br>0,87<br>6,86      | 105,31<br>1,16<br>4,41     | -0,04<br>0,40<br>0,46    | 0,23<br>0,91<br>0,40      | 0,00<br>0,56<br>0,26   | 0,05<br>1,06<br>0,25   | -0,01<br>0,88<br>0,38  | 0,06<br>1,66<br>0,39   |

R=0.7

| $k=0,02$ | 0,2                     |                             | 0,5                            |                         | 1                      |                        | 2                      |                        | 5                      |                       | 10                     |                       | 20                    |                      | 50                    |                      |
|----------|-------------------------|-----------------------------|--------------------------------|-------------------------|------------------------|------------------------|------------------------|------------------------|------------------------|-----------------------|------------------------|-----------------------|-----------------------|----------------------|-----------------------|----------------------|
|          | 0,5                     | 2320,54<br>3191,48<br>38,55 | 23341,81<br>12663,67<br>115,21 |                         |                        |                        |                        |                        |                        |                       |                        |                       |                       |                      |                       |                      |
| 1        | 4,21<br>860,44<br>8,05  | 2,16<br>1167,99<br>13,37    | 0,43<br>784,93<br>5,01         | 0,42<br>1035,01<br>7,47 |                        |                        |                        |                        |                        |                       |                        |                       |                       |                      |                       |                      |
| 2        | 8,28<br>388,62<br>11,00 | 2,80<br>470,92<br>14,74     | 0,23<br>267,39<br>3,28         | 7,85<br>356,99<br>5,70  | 0,08<br>289,75<br>2,20 | 0,26<br>349,19<br>3,64 |                        |                        |                        |                       |                        |                       |                       |                      |                       |                      |
| 5        | 179,61<br>94,76<br>8,09 | 999,40<br>120,97<br>10,83   | 1,15<br>30,98<br>0,76          | 1,23<br>63,85<br>2,13   | 0,04<br>3,25<br>0,26   | 0,23<br>17,31<br>0,18  | -5,35<br>28,17<br>0,64 | 30,63<br>76,60<br>0,58 |                        |                       |                        |                       |                       |                      |                       |                      |
| 10       | 38,60<br>28,77<br>7,64  | 13,53<br>36,28<br>7,63      | -0,54<br>6,57<br>0,68          | 17,76<br>16,45<br>0,77  | 0,02<br>0,04<br>0,11   | 0,18<br>0,09<br>0,10   | -0,04<br>0,03<br>0,21  | 0,10<br>0,15<br>0,25   | -0,14<br>27,51<br>1,03 | 0,19<br>38,85<br>0,80 |                        |                       |                       |                      |                       |                      |
| 20       | 59,24<br>8,18<br>10,93  | 33,59<br>9,40<br>12,00      | 1,22<br>0,99<br>0,65           | 2,84<br>3,41<br>0,60    | -0,01<br>0,03<br>0,10  | 0,11<br>0,08<br>0,11   | 0,00<br>0,04<br>0,07   | 0,09<br>0,12<br>0,17   | -0,01<br>2,69<br>0,33  | 0,09<br>5,64<br>0,25  | -0,15<br>17,54<br>1,56 | 0,20<br>14,13<br>1,23 |                       |                      |                       |                      |
| 50       | 74,14<br>2,79<br>11,10  | 65,00<br>2,98<br>9,51       | -1,49<br>0,62<br>0,83          | 20,48<br>1,57<br>2,01   | 0,00<br>0,35<br>0,17   | 0,11<br>1,05<br>0,16   | -0,01<br>0,32<br>0,13  | 0,06<br>0,94<br>0,16   | -0,01<br>2,63<br>0,44  | 0,06<br>4,21<br>0,49  | -0,12<br>5,51<br>1,37  | 0,14<br>4,33<br>0,48  | -0,22<br>5,00<br>3,58 | 0,21<br>3,97<br>2,46 |                       |                      |
| 100      | 114,01<br>2,05<br>8,64  | 192,29<br>2,02<br>8,08      | -1,22<br>2,59<br>0,79          | 13,06<br>3,34<br>0,77   | -0,01<br>2,37<br>0,61  | 0,10<br>2,68<br>0,45   | -0,01<br>3,05<br>0,71  | 0,07<br>3,14<br>0,54   | -0,02<br>3,22<br>0,75  | 0,04<br>3,08<br>0,56  | -0,11<br>3,30<br>1,29  | 0,11<br>2,75<br>0,48  | -0,30<br>2,09<br>3,18 | 0,24<br>2,13<br>2,40 | -0,43<br>1,16<br>5,51 | 0,18<br>1,99<br>2,59 |

| $k=0,05$ | 0,2                            |                                 | 0,5                             |                                 | 1                       |                         | 2                      |                        | 5                      |                       | 10                     |                       | 20                    |                      | 50                    |                      |
|----------|--------------------------------|---------------------------------|---------------------------------|---------------------------------|-------------------------|-------------------------|------------------------|------------------------|------------------------|-----------------------|------------------------|-----------------------|-----------------------|----------------------|-----------------------|----------------------|
|          | 0,5                            | -185521,3<br>-34515,7<br>-480,6 | 783742,8<br>185406,6<br>1210,9  |                                 |                         |                         |                        |                        |                        |                       |                        |                       |                       |                      |                       |                      |
| 1        | -147348,3<br>-15057,4<br>311,1 | 602824,0<br>65645,9<br>929,3    | -28927,49<br>-9490,01<br>142,02 | 183317,82<br>86431,96<br>752,10 |                         |                         |                        |                        |                        |                       |                        |                       |                       |                      |                       |                      |
| 2        | -1150,0<br>255,3<br>52,3       | 11189,5<br>935,8<br>326,3       | -39,88<br>359,42<br>14,41       | 288,15<br>370,46<br>19,41       | 0,36<br>343,87<br>10,57 | 0,40<br>367,92<br>14,23 |                        |                        |                        |                       |                        |                       |                       |                      |                       |                      |
| 5        | -68,7<br>97,8<br>15,9          | 639,6<br>105,7<br>18,8          | -17,31<br>85,26<br>9,73         | 218,05<br>121,13<br>14,07       | -4,23<br>56,96<br>2,55  | 32,80<br>93,39<br>6,10  | 0,17<br>127,46<br>4,35 | 0,28<br>138,97<br>7,51 |                        |                       |                        |                       |                       |                      |                       |                      |
| 10       | 43,1<br>40,4<br>13,8           | 20,7<br>43,2<br>14,2            | 6,67<br>26,43<br>4,23           | 4,99<br>34,24<br>7,41           | -1,64<br>4,17<br>0,61   | 18,74<br>12,59<br>2,01  | -1,05<br>12,07<br>0,48 | 10,38<br>22,66<br>0,61 | -0,06<br>53,43<br>3,37 | 0,23<br>43,24<br>4,47 |                        |                       |                       |                      |                       |                      |
| 20       | 66,6<br>12,5<br>22,0           | 46,4<br>12,2<br>19,8            | 7,37<br>8,12<br>5,52            | 6,87<br>11,60<br>10,44          | 0,11<br>1,77<br>0,33    | 0,41<br>5,51<br>0,33    | 0,01<br>2,47<br>0,21   | 0,18<br>7,22<br>0,28   | -0,09<br>16,16<br>1,02 | 0,19<br>18,50<br>0,54 | -0,11<br>20,29<br>1,50 | 0,19<br>19,27<br>1,03 |                       |                      |                       |                      |
| 50       | 92,1<br>4,8<br>20,1            | 131,3<br>4,5<br>26,4            | 4,76<br>7,61<br>4,83            | 6,91<br>10,55<br>9,87           | 0,03<br>5,44<br>0,62    | 0,31<br>8,23<br>0,63    | -0,01<br>6,49<br>0,71  | 0,12<br>7,89<br>0,65   | -0,07<br>10,14<br>1,18 | 0,11<br>8,01<br>0,62  | -0,17<br>9,38<br>1,88  | 0,17<br>6,52<br>0,86  | -0,21<br>7,62<br>8,07 | 0,21<br>6,05<br>6,95 |                       |                      |
| 100      | 130,4<br>4,4<br>24,1           | 185,9<br>6,3<br>32,6            | 11,57<br>6,16<br>2,82           | 61,64<br>5,60<br>4,86           | -0,06<br>7,10<br>0,92   | 0,22<br>5,37<br>0,66    | -0,04<br>6,67<br>1,02  | 0,12<br>5,66<br>0,72   | -0,09<br>5,89<br>1,17  | 0,12<br>4,31<br>0,63  | -0,20<br>4,48<br>2,06  | 0,18<br>4,01<br>2,03  | -0,26<br>2,63<br>5,94 | 0,21<br>2,87<br>5,29 | -0,53<br>5,81<br>8,74 | 0,19<br>6,70<br>6,30 |

R=0.8

$\tau_1 \times \text{frame rate}$

| $k=0,001$ | 0,2                     | 0,5                     | 1                       | 2                       | 5                     | 10                   | 20                   | 50                    |
|-----------|-------------------------|-------------------------|-------------------------|-------------------------|-----------------------|----------------------|----------------------|-----------------------|
| 0,5       | 1,30<br>1300,14<br>7,06 | 0,42<br>2010,26<br>4,45 |                         |                         |                       |                      |                      |                       |
| 1         | 3,06<br>902,16<br>1,50  | 0,70<br>1302,10<br>1,51 | -0,06<br>311,32<br>1,28 | 0,29<br>1141,39<br>0,86 |                       |                      |                      |                       |
| 2         | 5,02<br>400,18<br>1,00  | 2,04<br>616,62<br>0,81  | -0,02<br>0,00<br>0,07   | 0,07<br>0,03<br>0,06    | -0,02<br>0,02<br>0,30 | 0,06<br>0,08<br>0,24 |                      |                       |
| 5         | 4,11<br>17,14<br>2,15   | 4,11<br>57,02<br>0,94   | 0,00<br>0,00<br>0,55    | 0,03<br>0,01<br>0,73    | 0,00<br>0,01<br>0,01  | 0,01<br>0,00<br>0,05 | 0,01<br>0,02<br>0,04 |                       |
| 10        | 4,74<br>2,57<br>2,56    | 7,34<br>12,03<br>1,10   | 0,00<br>0,00<br>0,03    | 0,02<br>0,00<br>0,03    | 0,00<br>0,00<br>0,03  | 0,00<br>0,02<br>0,01 | 0,00<br>0,01<br>0,01 | -0,01<br>0,00<br>0,32 |
| 20        | 7,74<br>0,19<br>2,75    | 14,32<br>1,23<br>1,29   | 0,00<br>0,00<br>0,03    | 0,02<br>0,01<br>0,02    | 0,00<br>0,01<br>0,00  | 0,00<br>0,01<br>0,00 | 0,00<br>0,02<br>0,01 | 0,00<br>0,15<br>0,27  |
| 50        | -11,84<br>0,03<br>2,70  | 68,91<br>0,17<br>1,09   | -0,01<br>0,00<br>0,04   | 0,04<br>0,02<br>0,08    | 0,00<br>0,01<br>0,01  | 0,00<br>0,02<br>0,01 | 0,00<br>0,04<br>0,03 | 0,01<br>0,13<br>0,03  |
| 100       | 6,96<br>0,06<br>2,87    | 22,78<br>0,23<br>0,87   | 0,00<br>0,00<br>0,05    | 0,04<br>0,05<br>0,04    | 0,00<br>0,01<br>0,02  | 0,00<br>0,02<br>0,05 | 0,00<br>0,11<br>0,21 | 0,00<br>0,03<br>0,21  |

| $k=0,002$ | 0,2                     | 0,5                     | 1                       | 2                       | 5                      | 10                     | 20                   | 50                    |
|-----------|-------------------------|-------------------------|-------------------------|-------------------------|------------------------|------------------------|----------------------|-----------------------|
| 0,5       | 1,45<br>1376,22<br>8,28 | 0,73<br>2001,61<br>7,64 |                         |                         |                        |                        |                      |                       |
| 1         | 3,26<br>719,18<br>2,42  | 0,79<br>1013,47<br>3,37 | -0,04<br>446,95<br>1,42 | 0,29<br>1183,13<br>1,39 |                        |                        |                      |                       |
| 2         | 6,63<br>443,82<br>1,46  | 1,90<br>579,53<br>2,02  | -0,03<br>0,02<br>0,22   | 0,15<br>0,07<br>0,22    | -0,06<br>13,87<br>0,58 | 0,12<br>136,27<br>0,43 |                      |                       |
| 5         | 9,35<br>56,60<br>1,96   | 6,46<br>113,56<br>1,42  | 0,01<br>0,00<br>1,14    | 0,06<br>0,02<br>0,95    | 0,00<br>0,03<br>0,03   | 0,02<br>0,06<br>0,20   | 0,04<br>0,06<br>0,26 |                       |
| 10        | 16,96<br>19,25<br>2,87  | 12,19<br>33,77<br>2,29  | 0,00<br>0,00<br>0,17    | 0,05<br>0,01<br>0,33    | -0,01<br>0,00<br>0,11  | 0,05<br>0,03<br>0,42   | 0,00<br>0,02<br>0,01 | -0,01<br>0,02<br>0,28 |
| 20        | 26,35<br>2,61<br>3,92   | 21,23<br>5,34<br>2,76   | -0,01<br>0,00<br>0,06   | 0,04<br>0,01<br>0,04    | 0,00<br>0,01<br>0,01   | 0,00<br>0,02<br>0,01   | 0,00<br>0,04<br>0,03 | 0,01<br>0,04<br>0,51  |
| 50        | 26,62<br>0,68<br>4,03   | 69,78<br>1,14<br>1,86   | -0,01<br>0,00<br>0,09   | 0,07<br>0,04<br>0,16    | 0,00<br>0,03<br>0,01   | 0,00<br>0,04<br>0,01   | 0,00<br>0,09<br>0,02 | 0,01<br>0,68<br>0,13  |
| 100       | 39,44<br>0,34<br>4,63   | 61,38<br>0,60<br>2,23   | -0,02<br>0,00<br>0,12   | 0,08<br>0,10<br>0,10    | 0,00<br>0,02<br>0,06   | 0,00<br>0,13<br>0,06   | 0,00<br>0,48<br>0,14 | 0,00<br>1,14<br>0,38  |

| $k=0,005$ | 0,2                         | 0,5                         | 1                       | 2                       | 5                       | 10                     | 20                    | 50                    |
|-----------|-----------------------------|-----------------------------|-------------------------|-------------------------|-------------------------|------------------------|-----------------------|-----------------------|
| 0,5       | -179,45<br>1443,82<br>11,37 | 1066,13<br>2197,11<br>14,13 |                         |                         |                         |                        |                       |                       |
| 1         | 3,62<br>464,40<br>8,56      | 1,11<br>697,02<br>11,45     | -0,01<br>638,75<br>3,35 | 0,35<br>1023,44<br>4,64 |                         |                        |                       |                       |
| 2         | 7,33<br>294,71<br>4,49      | 1,89<br>447,22<br>7,04      | 0,04<br>19,46<br>0,63   | 0,33<br>134,55<br>0,29  | -0,07<br>170,88<br>0,72 | 0,18<br>327,68<br>0,61 |                       |                       |
| 5         | 12,91<br>57,39<br>3,37      | 5,90<br>83,52<br>3,83       | -0,01<br>0,01<br>1,09   | 0,17<br>0,04<br>0,89    | 0,00<br>0,06<br>0,07    | 0,06<br>0,14<br>0,05   | -0,03<br>0,04<br>0,54 | 0,07<br>0,14<br>0,49  |
| 10        | 32,16<br>38,61<br>4,16      | 12,65<br>50,68<br>4,02      | 0,00<br>0,01<br>0,60    | 0,11<br>0,03<br>0,72    | 0,02<br>-0,02<br>0,18   | 0,19<br>0,07<br>0,56   | -0,02<br>0,06<br>0,29 | 0,08<br>0,75<br>0,69  |
| 20        | 53,78<br>9,03<br>7,20       | 24,95<br>9,94<br>6,56       | -0,02<br>0,00<br>0,18   | 0,10<br>0,03<br>0,19    | 0,00<br>0,03<br>0,01    | 0,02<br>0,01<br>0,01   | 0,00<br>0,04<br>0,15  | -0,01<br>7,50<br>1,35 |
| 50        | 51,06<br>1,95<br>7,35       | 306,19<br>2,24<br>4,89      | 0,00<br>0,02<br>0,18    | 0,11<br>0,08<br>0,14    | 0,00<br>0,02<br>0,05    | 0,04<br>0,09<br>0,06   | 0,00<br>0,03<br>0,03  | 0,00<br>2,06<br>0,09  |
| 100       | 65,21<br>1,18<br>7,86       | 103,81<br>1,29<br>4,82      | 0,00<br>0,20<br>0,25    | 0,11<br>0,33<br>0,21    | -0,01<br>0,36<br>0,25   | 0,06<br>0,84<br>0,31   | 0,00<br>0,81<br>0,26  | 0,01<br>1,58<br>0,30  |

| $k=0,01$ | 0,2                       | 0,5                        | 1                      | 2                      | 5                       | 10                     | 20                    | 50                     |
|----------|---------------------------|----------------------------|------------------------|------------------------|-------------------------|------------------------|-----------------------|------------------------|
| 0,5      | 12,22<br>2221,36<br>29,69 | 118,63<br>2732,04<br>38,96 |                        |                        |                         |                        |                       |                        |
| 1        | 3,99<br>700,83<br>11,35   | 2,15<br>742,70<br>17,28    | 0,18<br>636,30<br>3,78 | 0,33<br>943,59<br>5,33 |                         |                        |                       |                        |
| 2        | 7,86<br>300,82<br>12,79   | 2,92<br>362,56<br>17,46    | 0,35<br>137,41<br>0,96 | 0,46<br>248,27<br>1,21 | -0,02<br>323,14<br>1,59 | 0,22<br>437,65<br>1,96 |                       |                        |
| 5        | 16,93<br>64,46<br>8,68    | 6,04<br>114,65<br>10,43    | 0,08<br>1,24<br>0,73   | 0,39<br>11,70<br>0,73  | 0,00<br>0,05<br>0,15    | 0,11<br>0,16<br>0,19   | -2,61<br>4,05<br>0,67 | 25,30<br>21,75<br>0,66 |
| 10       | -12,01<br>37,13<br>7,38   | 475,12<br>39,85<br>6,13    | -0,05<br>0,01<br>0,69  | 0,23<br>0,05<br>0,57   | 0,01<br>0,01<br>0,07    | 0,11<br>0,06<br>0,18   | -1,04<br>0,12<br>0,64 | 10,08<br>34,72<br>1,01 |
| 20       | 54,53<br>7,82<br>9,88     | 29,57<br>9,31<br>9,44      | 0,20<br>0,00<br>0,53   | 1,39<br>0,06<br>0,51   | 0,00<br>0,01<br>0,04    | 0,06<br>0,06<br>0,03   | 0,00<br>0,02<br>0,02  | -0,01<br>0,51<br>0,21  |
| 50       | 69,59<br>2,73<br>12,91    | 76,98<br>3,08<br>11,17     | 0,01<br>0,09<br>0,35   | 0,19<br>0,17<br>0,30   | 0,00<br>0,20<br>0,09    | 0,06<br>0,20<br>0,10   | 0,00<br>0,24<br>0,11  | 0,02<br>0,85<br>0,19   |
| 100      | 149,98<br>1,58<br>10,84   | 259,84<br>1,71<br>8,88     | -0,01<br>1,70<br>0,70  | 0,20<br>2,07<br>0,56   | 0,00<br>1,35<br>0,52    | 0,05<br>1,92<br>0,55   | 0,00<br>2,11<br>0,73  | 0,03<br>2,30<br>0,59   |

R=0.8

| $k=0,02$ | 0,2                       |                           | 0,5                        |                         | 1                       |                        | 2                       |                         | 5                      |                       | 10                     |                       | 20                    |                      | 50                    |                      |
|----------|---------------------------|---------------------------|----------------------------|-------------------------|-------------------------|------------------------|-------------------------|-------------------------|------------------------|-----------------------|------------------------|-----------------------|-----------------------|----------------------|-----------------------|----------------------|
|          | 0,5                       | 39,37<br>1513,64<br>40,14 | 197,26<br>2347,65<br>42,52 |                         |                         |                        |                         |                         |                        |                       |                        |                       |                       |                      |                       |                      |
| 1        | 6,27<br>509,70<br>29,07   | 5,16<br>695,84<br>37,69   | 0,18<br>760,64<br>7,21     | 1,84<br>943,20<br>9,86  |                         |                        |                         |                         |                        |                       |                        |                       |                       |                      |                       |                      |
| 2        | -18,91<br>283,70<br>22,23 | 270,05<br>366,89<br>27,31 | -0,18<br>216,10<br>4,35    | 10,52<br>305,93<br>7,54 | -0,04<br>320,65<br>3,97 | 1,09<br>381,02<br>5,95 |                         |                         |                        |                       |                        |                       |                       |                      |                       |                      |
| 5        | 15,48<br>99,50<br>13,62   | 7,85<br>116,40<br>17,98   | 0,81<br>26,24<br>0,98      | 1,02<br>61,64<br>2,67   | 0,00<br>5,01<br>0,36    | 0,20<br>23,24<br>0,33  | -10,63<br>57,84<br>0,98 | -46,25<br>97,73<br>0,92 |                        |                       |                        |                       |                       |                      |                       |                      |
| 10       | -192,58<br>47,86<br>12,99 | 2294,60<br>43,38<br>14,88 | 0,49<br>0,56<br>0,72       | 1,28<br>3,27<br>0,66    | 0,00<br>0,08<br>0,13    | 0,14<br>0,21<br>0,17   | -0,04<br>0,12<br>0,54   | 0,12<br>0,31<br>0,69    | -0,14<br>44,49<br>2,03 | 0,17<br>54,12<br>1,80 |                        |                       |                       |                      |                       |                      |
| 20       | 57,71<br>10,83<br>15,53   | 30,26<br>10,13<br>15,70   | 0,70<br>0,53<br>0,62       | 2,08<br>2,59<br>0,56    | 0,01<br>0,07<br>0,08    | 0,11<br>0,19<br>0,11   | -0,01<br>0,13<br>0,15   | 0,08<br>0,28<br>0,33    | -0,04<br>5,82<br>0,75  | 0,08<br>9,26<br>0,54  | -0,21<br>16,85<br>2,34 | 0,20<br>16,42<br>0,99 |                       |                      |                       |                      |
| 50       | 67,50<br>3,23<br>15,95    | 177,46<br>3,90<br>17,07   | -0,74<br>0,83<br>0,92      | 8,12<br>1,77<br>2,10    | 0,00<br>1,61<br>0,37    | 0,08<br>2,93<br>0,45   | 0,00<br>2,10<br>0,46    | 0,05<br>3,41<br>0,51    | -0,03<br>5,46<br>1,03  | 0,06<br>4,82<br>0,66  | -0,14<br>6,73<br>2,14  | 0,14<br>5,44<br>0,76  | -0,22<br>4,94<br>5,99 | 0,19<br>4,72<br>4,31 |                       |                      |
| 100      | 199,75<br>1,53<br>15,67   | 214,98<br>1,88<br>15,22   | 0,00<br>3,61<br>1,04       | 0,37<br>3,47<br>0,84    | 0,00<br>4,12<br>1,06    | 0,08<br>3,57<br>0,75   | -0,01<br>4,11<br>1,06   | 0,04<br>3,89<br>0,87    | -0,04<br>4,44<br>1,26  | 0,04<br>3,75<br>0,84  | -0,12<br>3,96<br>2,14  | 0,13<br>2,84<br>0,95  | -0,27<br>2,20<br>5,01 | 0,27<br>2,36<br>3,88 | -0,41<br>1,15<br>7,70 | 0,19<br>2,02<br>3,22 |

| $k=0,05$ | 0,2                           |                                | 0,5                              |                                   | 1                         |                           | 2                       |                         | 5                      |                       | 10                     |                       | 20                     |                      | 50                     |                      |
|----------|-------------------------------|--------------------------------|----------------------------------|-----------------------------------|---------------------------|---------------------------|-------------------------|-------------------------|------------------------|-----------------------|------------------------|-----------------------|------------------------|----------------------|------------------------|----------------------|
|          | 0,5                           | -177514,0<br>-37415,8<br>456,8 | 762294,3<br>167967,7<br>1420,7   |                                   |                           |                           |                         |                         |                        |                       |                        |                       |                        |                      |                        |                      |
| 1        | -12520,2<br>4813,1<br>356,3   | 575463,2<br>117048,5<br>1412,0 | -79185,41<br>-27617,04<br>491,46 | 284836,15<br>101868,82<br>1570,68 |                           |                           |                         |                         |                        |                       |                        |                       |                        |                      |                        |                      |
| 2        | -118144,0<br>-7648,5<br>316,0 | 539191,3<br>37529,2<br>1167,7  | -22355,49<br>-3580,38<br>283,53  | 186496,49<br>32207,37<br>1912,87  | -15,41<br>299,73<br>13,47 | 153,39<br>374,59<br>17,18 |                         |                         |                        |                       |                        |                       |                        |                      |                        |                      |
| 5        | -8205,4<br>-161,6<br>61,5     | 81894,1<br>2535,9<br>287,2     | -6162,74<br>-378,77<br>273,24    | 61086,99<br>4741,29<br>2612,88    | 0,21<br>83,29<br>2,21     | 0,52<br>115,99<br>4,42    | -2,19<br>100,98<br>4,71 | 21,72<br>123,57<br>7,87 |                        |                       |                        |                       |                        |                      |                        |                      |
| 10       | 29,7<br>33,1<br>23,2          | 137,8<br>33,7<br>26,8          | 4,54<br>34,16<br>4,49            | 4,05<br>45,06<br>8,74             | -1,35<br>10,83<br>0,69    | 14,42<br>25,09<br>1,82    | -1,88<br>23,52<br>0,96  | 13,62<br>32,92<br>2,00  | -0,05<br>49,51<br>5,83 | 0,23<br>54,15<br>8,04 |                        |                       |                        |                      |                        |                      |
| 20       | 66,2<br>14,2<br>27,5          | 87,5<br>14,2<br>34,3           | 5,72<br>12,20<br>8,08            | 6,64<br>15,15<br>18,21            | 0,04<br>5,79<br>0,58      | 0,33<br>11,02<br>0,64     | -0,02<br>10,53<br>0,63  | 0,15<br>17,85<br>0,70   | -0,17<br>23,07<br>2,31 | 0,42<br>21,54<br>2,87 | -0,13<br>19,51<br>3,49 | 0,22<br>18,73<br>3,58 |                        |                      |                        |                      |
| 50       | 149,4<br>6,5<br>36,9          | 247,1<br>6,9<br>45,2           | 8,29<br>10,26<br>2,98            | 31,86<br>9,51<br>5,89             | -0,04<br>8,53<br>1,15     | 0,23<br>9,77<br>0,89      | -0,04<br>9,48<br>1,20   | 0,11<br>9,73<br>0,99    | -0,11<br>12,32<br>2,09 | 0,13<br>8,78<br>1,47  | -0,17<br>9,93<br>2,73  | 0,18<br>7,30<br>1,28  | -0,26<br>5,53<br>10,95 | 0,21<br>5,33<br>8,49 |                        |                      |
| 100      | -5,3<br>3,7<br>31,8           | 2122,2<br>6,0<br>38,0          | 9,58<br>8,14<br>4,44             | 34,89<br>6,22<br>9,28             | -0,03<br>8,05<br>1,67     | 0,37<br>6,50<br>2,22      | -0,06<br>7,68<br>1,42   | 0,11<br>6,04<br>0,97    | -0,11<br>7,66<br>2,09  | 0,13<br>5,66<br>1,45  | -0,16<br>4,67<br>2,71  | 0,16<br>3,87<br>1,78  | -0,22<br>2,57<br>10,23 | 0,19<br>2,68<br>9,16 | -0,56<br>5,19<br>10,60 | 0,17<br>5,50<br>6,14 |

R=0.9

$\tau_1 \times \text{frame rate}$

| $k=0,001$ | 0,2                         | 0,5                         | 1                       | 2                       | 5                     | 10                   | 20                   | 50                     |
|-----------|-----------------------------|-----------------------------|-------------------------|-------------------------|-----------------------|----------------------|----------------------|------------------------|
| 0,5       | -159,01<br>5090,20<br>17,36 | 1070,59<br>5372,22<br>69,59 |                         |                         |                       |                      |                      |                        |
| 1         | 2,74<br>763,57<br>2,52      | 0,77<br>970,26<br>4,40      | 0,01<br>1168,15<br>0,92 | 0,16<br>1849,85<br>0,90 |                       |                      |                      |                        |
| 2         | 3,44<br>105,89<br>1,99      | 1,87<br>239,73<br>1,50      | 0,00<br>0,01<br>5,85    | 0,07<br>0,06<br>2,50    | -0,03<br>0,10<br>0,84 | 0,06<br>0,24<br>0,81 |                      |                        |
| 5         | 2,23<br>3,17<br>3,89        | 2,35<br>16,12<br>1,88       | 0,02<br>-0,01<br>2,53   | 0,17<br>0,05<br>2,25    | 0,00<br>0,00<br>0,06  | 0,01<br>0,02<br>0,29 | 0,00<br>0,06<br>0,08 |                        |
| 10        | 2,73<br>2,34<br>3,50        | 4,68<br>11,41<br>1,94       | 0,00<br>0,00<br>0,03    | 0,02<br>0,01<br>0,02    | 0,00<br>0,01<br>0,01  | 0,01<br>0,02<br>0,01 | 0,00<br>0,03<br>0,35 | 0,06<br>0,09<br>0,63   |
| 20        | 2,69<br>0,21<br>3,74        | 6,91<br>1,42<br>1,82        | 0,00<br>0,00<br>0,03    | 0,02<br>0,01<br>0,02    | 0,00<br>0,00<br>0,00  | 0,00<br>0,02<br>1,03 | 0,00<br>0,32<br>0,79 | 0,11<br>0,88<br>0,85   |
| 50        | 1,33<br>0,13<br>4,46        | 22,64<br>0,58<br>2,01       | 0,00<br>0,00<br>0,04    | 0,02<br>0,03<br>0,04    | 0,00<br>0,01<br>0,29  | 0,00<br>0,00<br>0,01 | 0,00<br>0,31<br>0,34 | 0,01<br>0,66<br>0,77   |
| 100       | 3,29<br>0,04<br>4,62        | 13,24<br>0,10<br>2,00       | 0,00<br>0,02<br>0,07    | 0,02<br>0,10<br>0,05    | 0,00<br>0,03<br>0,06  | 0,00<br>0,11<br>0,06 | 0,00<br>0,75<br>0,58 | 0,00<br>-0,08<br>1,99  |
|           |                             |                             |                         |                         |                       |                      | 0,07<br>0,32<br>1,63 | 0,11<br>0,12<br>2,17   |
|           |                             |                             |                         |                         |                       |                      |                      | -0,38<br>-0,34<br>7,39 |
|           |                             |                             |                         |                         |                       |                      |                      | 0,21<br>0,25<br>2,34   |

| $k=0,002$ | 0,2                         | 0,5                         | 1                      | 2                       | 5                       | 10                     | 20                   | 50                     |
|-----------|-----------------------------|-----------------------------|------------------------|-------------------------|-------------------------|------------------------|----------------------|------------------------|
| 0,5       | -275,44<br>2546,74<br>18,23 | 1094,54<br>3260,58<br>56,10 |                        |                         |                         |                        |                      |                        |
| 1         | 2,81<br>566,38<br>6,92      | 0,91<br>708,40<br>8,09      | 0,05<br>736,88<br>1,37 | 0,18<br>1316,02<br>1,63 |                         |                        |                      |                        |
| 2         | 5,79<br>224,80<br>3,61      | 2,07<br>322,03<br>6,02      | -0,02<br>0,05<br>5,85  | 0,16<br>0,15<br>2,61    | -0,11<br>102,69<br>1,37 | 0,16<br>330,38<br>1,23 |                      |                        |
| 5         | 7,94<br>22,81<br>5,59       | 5,21<br>48,80<br>4,66       | -0,01<br>-0,01<br>3,18 | 0,13<br>0,05<br>2,99    | 0,00<br>0,01<br>0,17    | 0,02<br>0,10<br>0,59   | 0,00<br>0,23<br>0,23 |                        |
| 10        | 2,59<br>19,29<br>5,78       | 124,15<br>35,03<br>6,81     | 0,00<br>0,00<br>0,67   | 0,04<br>0,02<br>1,32    | 0,00<br>0,03<br>0,02    | 0,01<br>0,03<br>0,01   | 0,00<br>0,07<br>0,88 | 0,08<br>0,25<br>0,97   |
| 20        | 20,36<br>3,09<br>6,84       | 17,74<br>5,73<br>6,11       | 0,00<br>0,00<br>0,06   | 0,04<br>0,02<br>0,04    | 0,00<br>0,02<br>0,01    | 0,01<br>0,04<br>0,01   | 0,00<br>0,01<br>0,91 | 0,10<br>6,14<br>1,43   |
| 50        | 24,54<br>0,86<br>8,82       | 45,86<br>1,71<br>6,06       | 0,00<br>0,00<br>0,06   | 0,03<br>0,06<br>0,05    | -0,02<br>0,10<br>0,43   | 0,07<br>0,10<br>1,23   | 0,00<br>0,08<br>0,03 | 0,00<br>1,84<br>0,76   |
| 100       | 29,72<br>0,65<br>8,69       | 39,27<br>1,08<br>5,36       | 0,00<br>0,12<br>0,16   | 0,03<br>0,26<br>0,15    | -0,01<br>0,55<br>0,44   | 0,06<br>0,11<br>0,94   | 0,00<br>0,28<br>0,22 | 0,00<br>1,21<br>0,30   |
|           |                             |                             |                        |                         |                         |                        | 0,05<br>0,12<br>0,91 | 0,01<br>2,38<br>2,29   |
|           |                             |                             |                        |                         |                         |                        |                      | -0,17<br>-0,15<br>3,10 |
|           |                             |                             |                        |                         |                         |                        |                      | 0,15<br>1,34<br>2,36   |
|           |                             |                             |                        |                         |                         |                        |                      | -0,34<br>-0,29<br>7,05 |
|           |                             |                             |                        |                         |                         |                        |                      | 0,18<br>0,27<br>2,66   |

| $k=0,005$ | 0,2                        | 0,5                        | 1                      | 2                      | 5                       | 10                     | 20                   | 50                     |
|-----------|----------------------------|----------------------------|------------------------|------------------------|-------------------------|------------------------|----------------------|------------------------|
| 0,5       | -68,09<br>2386,87<br>42,30 | 807,42<br>3260,73<br>54,42 |                        |                        |                         |                        |                      |                        |
| 1         | 3,31<br>610,47<br>17,26    | 1,71<br>796,47<br>24,50    | 0,08<br>447,10<br>3,69 | 0,22<br>838,89<br>6,10 |                         |                        |                      |                        |
| 2         | 7,03<br>249,09<br>15,89    | 2,59<br>313,96<br>24,72    | -0,07<br>45,89<br>2,81 | 0,25<br>183,09<br>2,10 | -0,06<br>468,40<br>1,62 | 0,17<br>549,23<br>2,58 |                      |                        |
| 5         | 14,23<br>57,14<br>14,49    | 8,74<br>86,57<br>16,11     | 0,00<br>0,01<br>2,01   | 0,15<br>0,08<br>2,16   | -0,04<br>-0,02<br>1,02  | 0,11<br>26,22<br>0,79  |                      |                        |
| 10        | 33,78<br>44,12<br>14,10    | 13,83<br>46,79<br>13,90    | -0,03<br>0,00<br>1,07  | 0,12<br>0,05<br>1,43   | -0,01<br>0,01<br>0,13   | 0,06<br>0,08<br>0,54   | 0,00<br>0,10<br>0,09 | 0,12<br>28,37<br>1,78  |
| 20        | 42,18<br>5,96<br>21,00     | 28,42<br>8,56<br>18,83     | -0,02<br>0,00<br>0,69  | 0,10<br>0,06<br>1,24   | -0,02<br>0,10<br>0,29   | 0,08<br>0,10<br>0,91   | 0,00<br>0,33<br>0,33 | 0,05<br>16,93<br>0,60  |
| 50        | 42,14<br>3,52<br>18,52     | 207,78<br>5,09<br>12,34    | 0,09<br>0,09<br>0,35   | 0,93<br>0,21<br>0,79   | -0,01<br>0,06<br>0,33   | 0,08<br>0,29<br>1,10   | 0,00<br>0,17<br>0,12 | 0,01<br>4,47<br>0,14   |
| 100       | 121,11<br>1,88<br>20,08    | 160,22<br>2,15<br>17,20    | 0,00<br>1,35<br>0,86   | 0,09<br>2,22<br>1,00   | -0,04<br>2,22<br>1,25   | 0,10<br>2,31<br>1,40   | 0,00<br>2,21<br>1,00 | 0,01<br>2,58<br>0,93   |
|           |                            |                            |                        |                        |                         |                        | 0,05<br>0,05<br>1,29 | 0,05<br>-0,04<br>2,14  |
|           |                            |                            |                        |                        |                         |                        |                      | -0,14<br>-0,15<br>6,06 |
|           |                            |                            |                        |                        |                         |                        |                      | 16,49<br>3,92<br>3,44  |
|           |                            |                            |                        |                        |                         |                        |                      | -0,25<br>-0,30<br>9,07 |
|           |                            |                            |                        |                        |                         |                        |                      | 0,18<br>0,27<br>4,46   |

| $k=0,01$ | 0,2                         | 0,5                          | 1                      | 2                      | 5                       | 10                     | 20                    | 50                     |
|----------|-----------------------------|------------------------------|------------------------|------------------------|-------------------------|------------------------|-----------------------|------------------------|
| 0,5      | -523,98<br>1736,48<br>92,21 | 3390,13<br>2881,55<br>112,83 |                        |                        |                         |                        |                       |                        |
| 1        | 4,32<br>841,61<br>38,13     | 7,45<br>1109,55<br>50,57     | 0,14<br>588,43<br>6,39 | 0,26<br>998,63<br>8,99 |                         |                        |                       |                        |
| 2        | 7,41<br>294,09<br>30,38     | 3,57<br>341,01<br>43,03      | 0,13<br>176,42<br>3,08 | 0,38<br>365,53<br>5,22 | -0,05<br>463,41<br>4,08 | 0,20<br>463,63<br>7,17 |                       |                        |
| 5        | 18,01<br>82,60<br>26,64     | 8,25<br>103,81<br>28,83      | 0,04<br>0,87<br>1,31   | 0,31<br>7,31<br>1,74   | -0,06<br>1,07<br>1,14   | 0,13<br>9,15<br>1,59   | 0,00<br>41,46<br>1,34 | 0,14<br>101,77<br>1,21 |
| 10       | 38,99<br>33,69<br>20,13     | 14,35<br>37,71<br>17,78      | -0,03<br>0,04<br>1,08  | 0,23<br>0,12<br>1,44   | -0,01<br>0,13<br>0,22   | 0,08<br>0,13<br>0,63   | 0,00<br>0,17<br>0,24  | 0,04<br>52,50<br>2,50  |
| 20       | 54,66<br>11,30<br>32,73     | 50,03<br>12,04<br>30,55      | 0,01<br>0,04<br>0,74   | 0,20<br>0,14<br>1,05   | -0,01<br>0,15<br>0,20   | 0,07<br>0,23<br>0,85   | 0,00<br>0,13<br>0,06  | 0,04<br>23,52<br>0,05  |
| 50       | 82,75<br>3,89<br>27,59      | 213,59<br>3,74<br>29,59      | 0,00<br>1,18<br>0,78   | 0,20<br>2,61<br>0,90   | -0,01<br>1,04<br>0,51   | 0,06<br>2,37<br>0,92   | 0,00<br>3,08<br>0,45  | 0,02<br>4,70<br>0,70   |
| 100      | 248,28<br>2,33<br>32,82     | 303,67<br>2,53<br>37,91      | -0,03<br>3,79<br>1,71  | 0,19<br>3,87<br>1,56   | -0,02<br>4,46<br>1,92   | 0,01<br>4,20<br>1,57   | 0,00<br>4,36<br>1,62  | 0,01<br>4,32<br>1,37   |
|          |                             |                              |                        |                        |                         |                        | 0,04<br>1,13<br>1,24  | 0,04<br>11,30<br>1,24  |
|          |                             |                              |                        |                        |                         |                        |                       | -0,10<br>-0,11<br>3,52 |
|          |                             |                              |                        |                        |                         |                        |                       | 0,16<br>23,52<br>2,34  |
|          |                             |                              |                        |                        |                         |                        |                       | -0,18<br>-0,21<br>9,42 |
|          |                             |                              |                        |                        |                         |                        |                       | 0,15<br>4,84<br>5,51   |
|          |                             |                              |                        |                        |                         |                        |                       | -0,34<br>0,49<br>10,61 |
|          |                             |                              |                        |                        |                         |                        |                       | 0,16<br>1,10<br>4,66   |

R=0.9

| $\lambda = 0,02$ | 0,2                                     |                                    | 0,5                              |                 | 1                               |                              | 2                             |                                | 5                              |                                | 10                            |              | 20                             |              | 50             |              |
|------------------|-----------------------------------------|------------------------------------|----------------------------------|-----------------|---------------------------------|------------------------------|-------------------------------|--------------------------------|--------------------------------|--------------------------------|-------------------------------|--------------|--------------------------------|--------------|----------------|--------------|
|                  | 0,5                                     | 74,95<br>1313,41<br>75,84<br>88,46 | 228,74<br>2510,90                |                 |                                 |                              |                               |                                |                                |                                |                               |              |                                |              |                |              |
| 1                | 12833,17<br>3902,20<br>163,94<br>816,60 | 127256,03<br>32679,19              | 0,20<br>814,23<br>11,44<br>19,15 | 0,40<br>1100,61 |                                 |                              |                               |                                |                                |                                |                               |              |                                |              |                |              |
| 2                | 14,95<br>311,13<br>60,74<br>70,13       | 41,59<br>452,17                    | 0,49<br>270,00<br>8,11<br>18,51  | 0,54<br>404,03  | 0,03<br>396,06<br>8,16<br>11,27 | 0,23<br>483,35               |                               |                                |                                |                                |                               |              |                                |              |                |              |
| 5                | -70,75<br>91,52<br>43,07<br>47,78       | 754,96<br>117,86<br>47,78          | -28,78<br>27,74<br>1,37<br>1,47  | 288,53<br>63,84 | -0,10<br>33,20<br>1,24<br>1,39  | 0,23<br>67,51<br>1,39        | 0,26<br>149,88                |                                |                                |                                |                               |              |                                |              |                |              |
| 10               | 38,65<br>38,77<br>33,43<br>34,61        | 24,34<br>40,59                     | 0,09<br>1,29<br>1,04<br>1,20     | 0,48<br>6,74    | -0,03<br>2,06<br>0,38<br>0,91   | 0,15<br>8,31<br>0,85<br>0,91 | 0,26<br>22,52                 | -0,11<br>52,63<br>5,84<br>6,52 | 0,17<br>69,15                  |                                |                               |              |                                |              |                |              |
| 20               | 50,24<br>9,32<br>45,43                  | 44,10<br>11,29<br>51,84            | 0,26<br>1,17<br>0,92<br>1,11     | 1,07<br>4,64    | 0,00<br>0,85<br>0,25<br>0,59    | 0,09<br>4,18<br>0,59<br>0,99 | 0,06<br>7,95<br>0,66          | -0,05<br>24,87<br>2,58<br>1,49 | 0,09<br>23,24                  | -0,15<br>21,33<br>5,19<br>3,13 | 0,17<br>22,22                 |              |                                |              |                |              |
| 50               | 154,60<br>5,86<br>40,90                 | 244,90<br>5,37<br>48,58            | -0,01<br>5,68<br>1,77<br>1,75    | 0,33<br>7,63    | -0,02<br>6,55<br>1,59<br>1,58   | 0,08<br>6,68                 | -1,91<br>6,26<br>1,49<br>1,60 | 18,35<br>7,91                  | -0,03<br>11,39<br>2,62<br>1,37 | 0,06<br>8,57                   | -0,14<br>9,82<br>4,79<br>2,88 | 0,15<br>8,16 | -0,22<br>3,85<br>11,85<br>7,91 | 0,18<br>4,73 |                |              |
| 100              | 1912,73<br>7,38<br>77,86                | 16528,05<br>43,57<br>236,24        | 0,04<br>8,19<br>3,68<br>12,00    | 0,99<br>6,77    | -0,02<br>7,26<br>2,33<br>1,59   | 0,09<br>5,59                 | -0,02<br>6,21<br>2,03<br>1,58 | 0,04<br>5,67                   | -0,07<br>7,80<br>3,40<br>2,65  | 0,10<br>5,19                   | -0,19<br>4,42<br>4,76<br>2,38 | 0,16<br>3,95 | -0,22<br>1,87<br>10,72<br>6,15 | 0,16<br>2,28 | -0,44<br>13,79 | 0,20<br>6,22 |

  

| $\lambda = 0,05$ | 0,2                                      |                                          | 0,5                                         |                       | 1                                           |                       | 2                                 |                 | 5                                |               | 10                              |               | 20                              |              | 50                              |              |
|------------------|------------------------------------------|------------------------------------------|---------------------------------------------|-----------------------|---------------------------------------------|-----------------------|-----------------------------------|-----------------|----------------------------------|---------------|---------------------------------|---------------|---------------------------------|--------------|---------------------------------|--------------|
|                  | 0,5                                      | -141035,3<br>-27245,1<br>861,9<br>2328,3 | 581905,3<br>167306,2                        |                       |                                             |                       |                                   |                 |                                  |               |                                 |               |                                 |              |                                 |              |
| 1                | -181081,6<br>-20415,0<br>840,0<br>2614,8 | 741456,4<br>89386,8                      | -52044,49<br>-15854,82<br>571,87<br>2149,22 | 256725,96<br>79345,14 |                                             |                       |                                   |                 |                                  |               |                                 |               |                                 |              |                                 |              |
| 2                | -113143,4<br>-5539,2<br>557,9<br>1812,2  | 576635,1<br>27981,3                      | -14728,56<br>-1887,77<br>201,77<br>1078,86  | 115114,11<br>17458,81 | -0,10<br>363,32<br>21,53<br>32,16           | 2,65<br>411,62        |                                   |                 |                                  |               |                                 |               |                                 |              |                                 |              |
| 5                | -27116,2<br>-613,4<br>235,4<br>1116,6    | 283275,1<br>7811,9                       | -9,92<br>116,51<br>28,42<br>37,98           | 154,80<br>149,02      | -15946,62<br>-2200,13<br>1183,97<br>8248,02 | 111976,29<br>16202,44 | -5,71<br>131,04<br>16,46<br>22,73 | 56,08<br>133,42 |                                  |               |                                 |               |                                 |              |                                 |              |
| 10               | -15162,3<br>-189,8<br>146,2<br>793,6     | 157627,3<br>2383,5                       | 3,32<br>44,46<br>15,37<br>28,28             | 4,05<br>55,15         | -2333,14<br>-133,76<br>310,78<br>3074,11    | 23213,95<br>1717,76   | -1,54<br>45,17<br>4,72<br>10,72   | 12,14<br>68,33  | -0,10<br>57,66<br>12,48<br>15,07 | 0,23<br>65,46 |                                 |               |                                 |              |                                 |              |
| 20               | -32012,6<br>-158,4<br>252,7<br>1012,9    | 273828,3<br>1473,2                       | 4,51<br>29,35<br>14,31<br>69,86             | 17,56<br>28,87        | -2898,00<br>-98,56<br>543,70<br>5392,55     | 28834,84<br>1178,19   | -0,06<br>28,17<br>2,73<br>5,41    | 0,16<br>28,75   | -0,14<br>25,83<br>7,85<br>9,31   | 0,20<br>18,78 | -0,11<br>21,66<br>9,17<br>10,85 | 0,18<br>18,78 |                                 |              |                                 |              |
| 50               | 2360,7<br>19,7<br>112,8                  | 15083,0<br>79,8<br>240,0                 | 9,79<br>19,00<br>8,79<br>19,38              | 39,93<br>13,72        | -1554,80<br>-7,14<br>302,33<br>2978,83      | 15469,66<br>247,61    | -1,06<br>15,48<br>3,28<br>4,55    | 9,57<br>13,02   | -0,12<br>15,75<br>6,46<br>7,85   | 0,14<br>12,80 | -0,15<br>8,37<br>6,44<br>4,75   | 0,16<br>8,18  | -0,24<br>4,93<br>17,58<br>13,50 | 0,17<br>5,53 |                                 |              |
| 100              | 2688,6<br>12,5<br>102,4                  | 23625,1<br>61,9                          | -85,31<br>10,86<br>43,81<br>292,39          | 1036,55<br>10,37      | -0,09<br>11,12<br>4,37<br>10,58             | 0,21<br>8,22          | -0,08<br>11,11<br>4,76<br>8,24    | 0,16<br>8,16    | -0,13<br>6,29<br>8,86<br>10,74   | 0,18<br>5,86  | -0,19<br>4,06<br>5,65<br>4,55   | 0,16<br>3,77  | -0,25<br>2,47<br>19,45<br>23,56 | 0,19<br>2,90 | -0,53<br>4,05<br>21,23<br>13,06 | 0,16<br>5,38 |
